# Supplementary material for: The Genomic Aftermath of Hybridization in the Opportunistic Pathogen Candida metapsilosis
Source: PubMed Central journal article supplement (PMC4627764; doi:10.1371/journal.pgen.1005626), 2015-10-30
Supplement: pgen.1005626.s002.pdf [file pgen.1005626.s002.pdf]

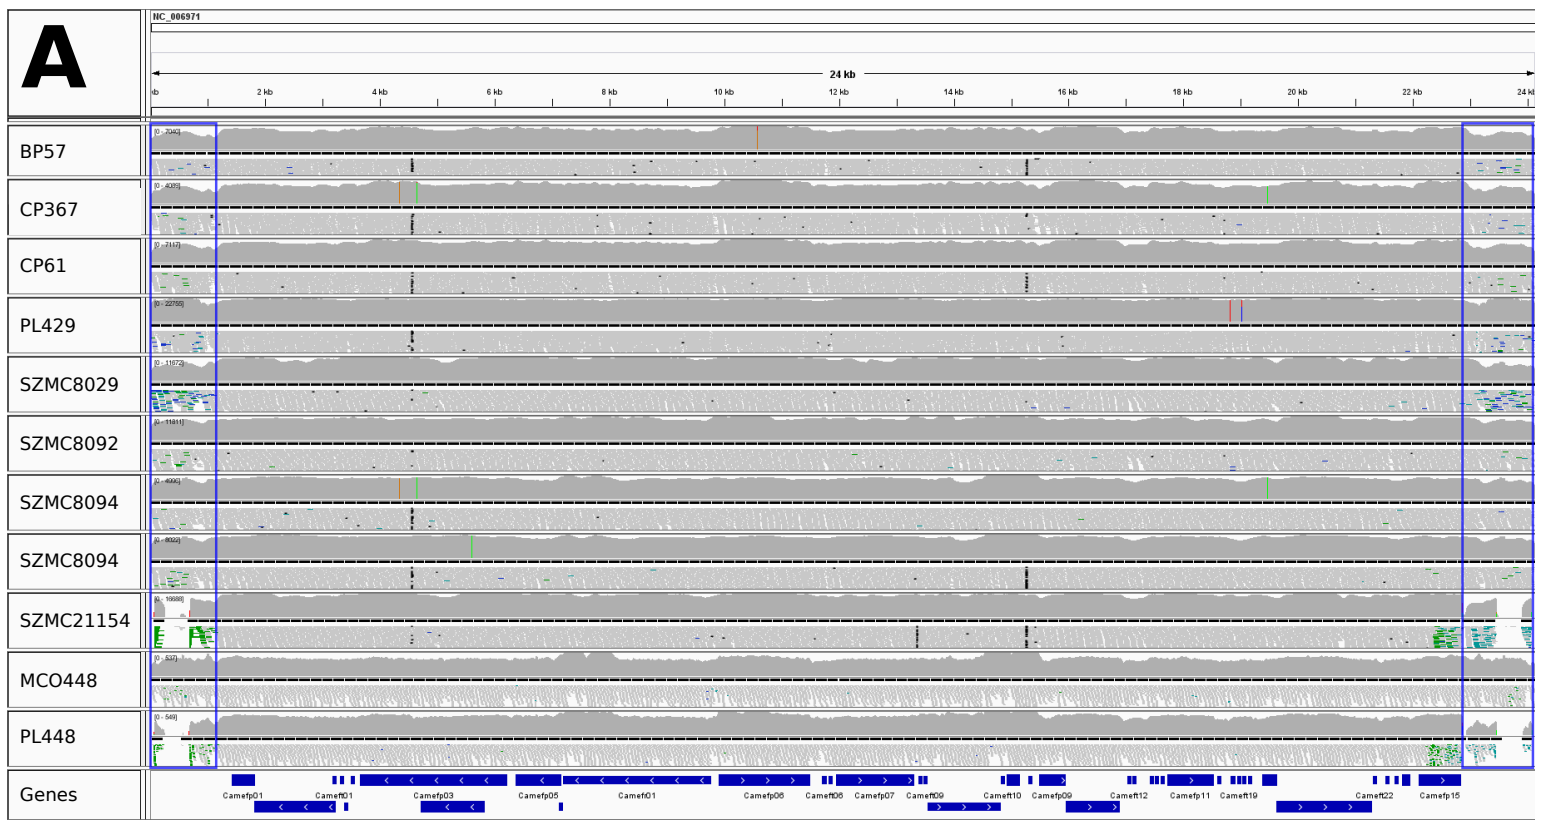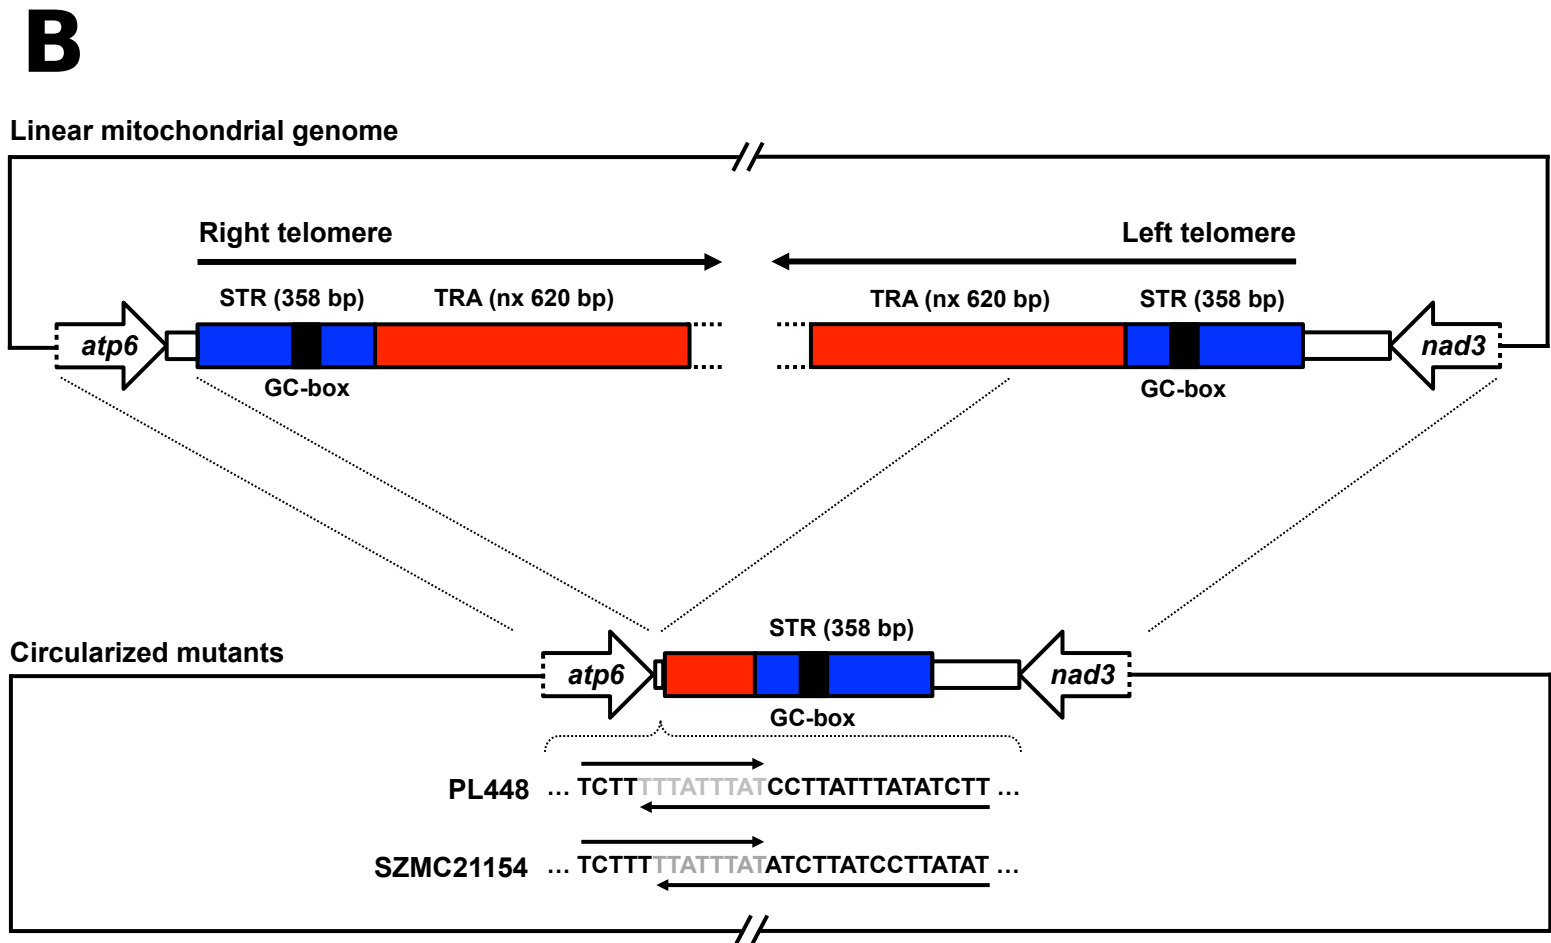

STR – subterminal repeat (358 bp)  
 TRA – tandem repeat array (nx 620 bp)
