# Supplementary material for: The Genomic Aftermath of Hybridization in the Opportunistic Pathogen Candida metapsilosis
Source: PubMed Central journal article supplement (PMC4627764; doi:10.1371/journal.pgen.1005626), 2015-10-30

**A**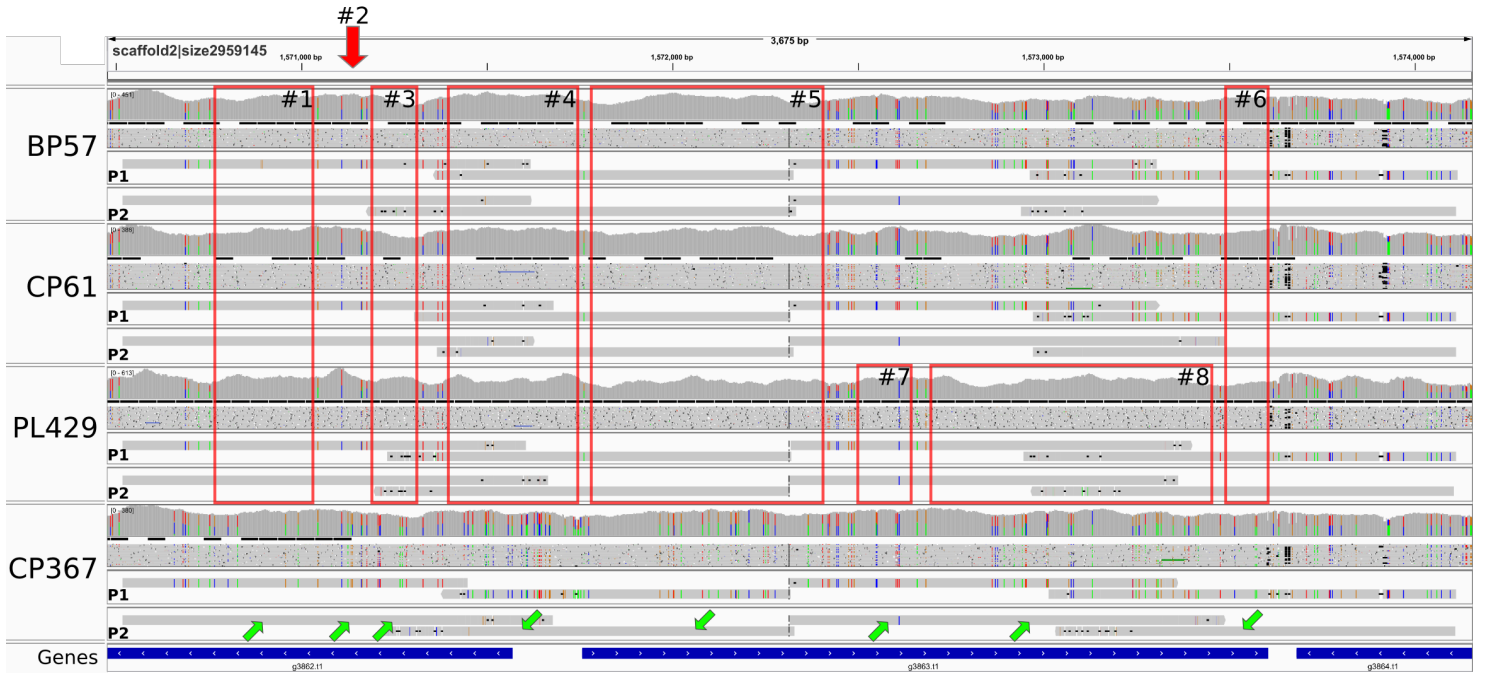**B**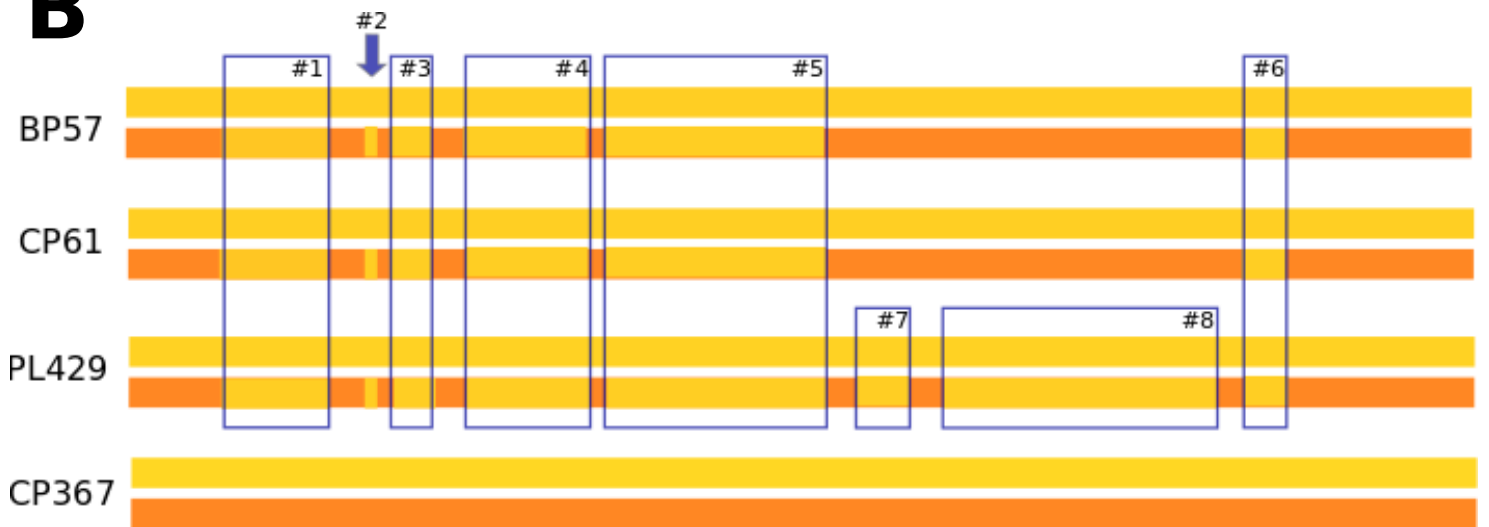

Supplement: pgen.1005626.s007.pdf [file pgen.1005626.s007.pdf]
