# Supplementary material for: The Genomic Aftermath of Hybridization in the Opportunistic Pathogen Candida metapsilosis
Source: PubMed Central journal article supplement (PMC4627764; doi:10.1371/journal.pgen.1005626), 2015-10-30
Supplement: pgen.1005626.s009.pdf [file pgen.1005626.s009.pdf]

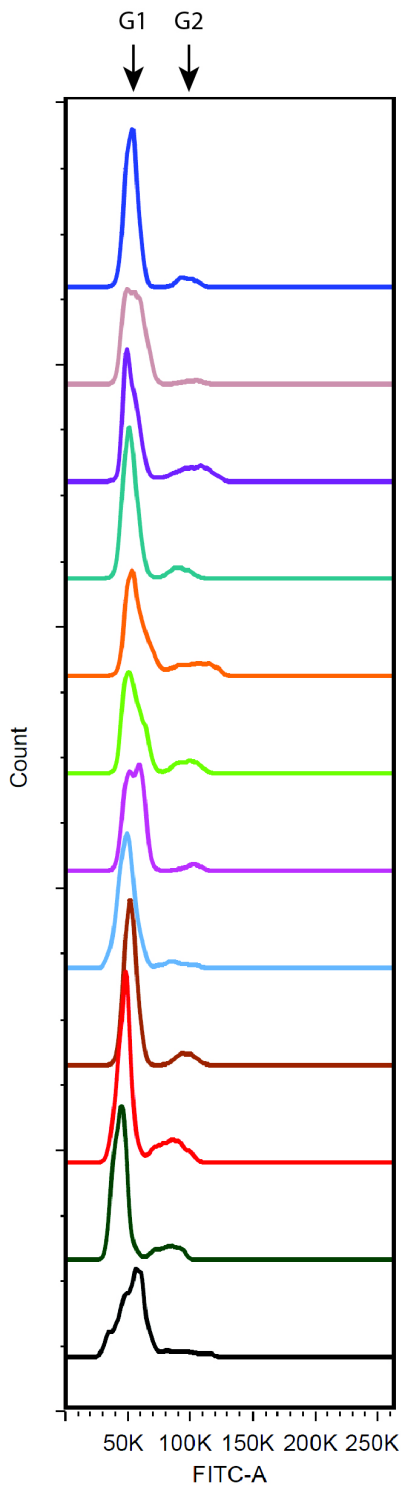

| Species                      | Strain     | G1 FITC-A<br>median | G2 FITC-A<br>median | Ratio<br>G2/G1 |
|------------------------------|------------|---------------------|---------------------|----------------|
| <i>Candida metapsilosis</i>  | SZMC 8092  | 52.86               | 97.09               | 1.84           |
| <i>Candida metapsilosis</i>  | SZMC 8093  | 54.30               | 102.48              | 1.89           |
| <i>Candida metapsilosis</i>  | SZMC 8094  | 52.06               | 103.11              | 1.98           |
| <i>Candida metapsilosis</i>  | SZMC 8095  | 51.51               | 91.20               | 1.77           |
| <i>Candida metapsilosis</i>  | SZMC 8098  | 55.48               | 105.39              | 1.90           |
| <i>Candida metapsilosis</i>  | SZMC 21154 | 52.95               | 97.97               | 1.85           |
| <i>Candida metapsilosis</i>  | SZMC 1548  | 54.54               | 101.41              | 1.86           |
| <i>Candida metapsilosis</i>  | SZMC 8022  | 48.97               | 88.78               | 1.81           |
| <i>Candida metapsilosis</i>  | SZMC 8029  | 52.06               | 96.32               | 1.85           |
| <i>Candida parapsilosis</i>  | GA 1       | 47.23               | 83.86               | 1.78           |
| <i>Candida orthopsilosis</i> | SZMC 1545  | 43.60               | 83.00               | 1.90           |
| <i>Candida albicans</i>      | SC 5314    | 53.34               | 101.43              | 1.90           |

- C.metapsilosis SZMC 8092
- C.metapsilosis SZMC 8093
- C.metapsilosis SZMC 8094
- C.metapsilosis SZMC 8095
- C.metapsilosis SZMC 8098
- C.metapsilosis SZMC 21154
- C.metapsilosis SZMC 1548
- C.metapsilosis SZMC 8022
- C.metapsilosis SZMC 8029
- C.parapsilosis GA1
- C.orthopsilosis SZMC 1545
- C.albicans SC 5314
