# Supplementary material for: The Genomic Aftermath of Hybridization in the Opportunistic Pathogen Candida metapsilosis
Source: PubMed Central journal article supplement (PMC4627764; doi:10.1371/journal.pgen.1005626), 2015-10-30
Supplement: pgen.1005626.s011.pdf [file pgen.1005626.s011.pdf]

**A**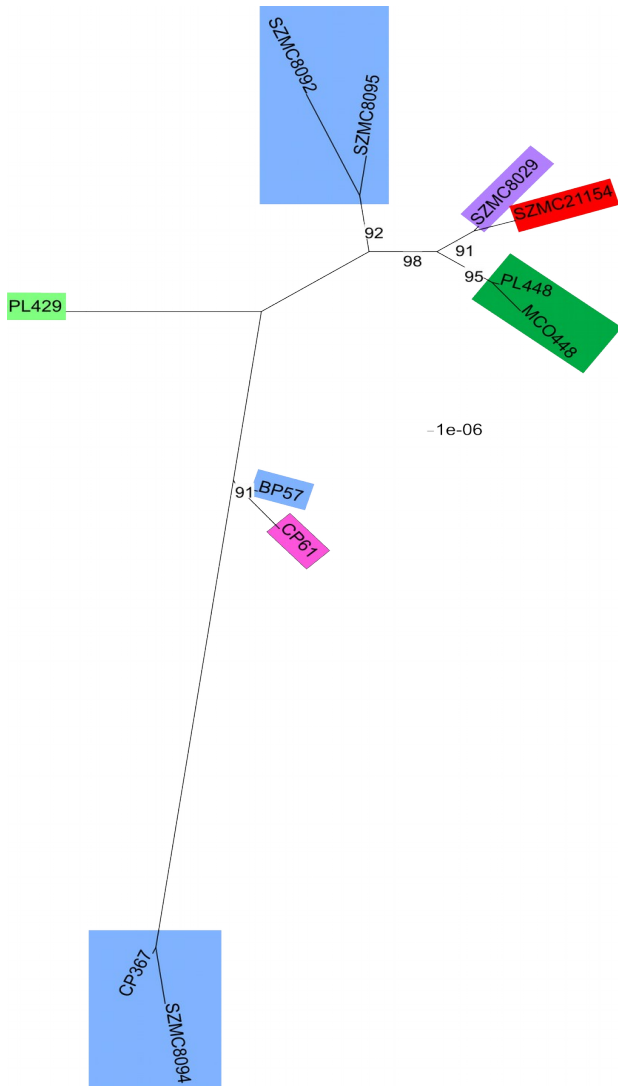**B**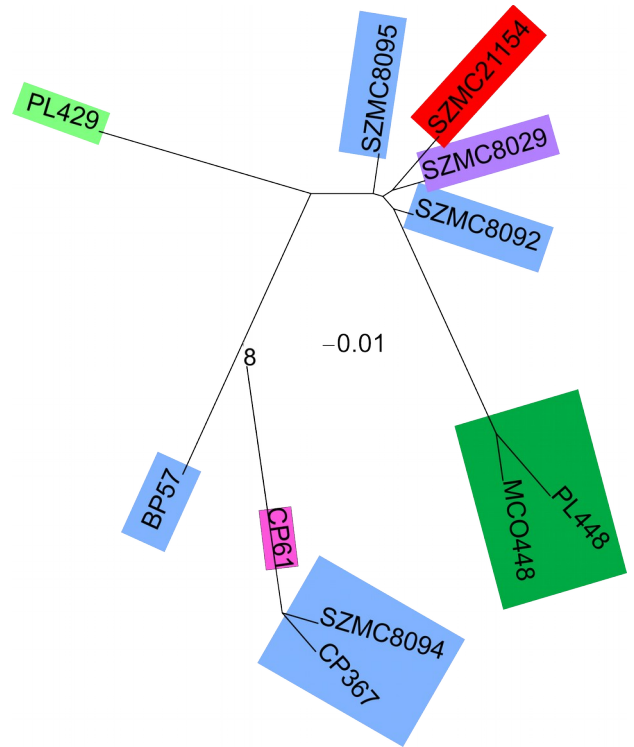

|                 |
|-----------------|
| Cataluna, ES    |
| Debrecen, HU    |
| Pécs, HU        |
| Pisa, IT        |
| Livermore, USA  |
| Washington, USA |

**C**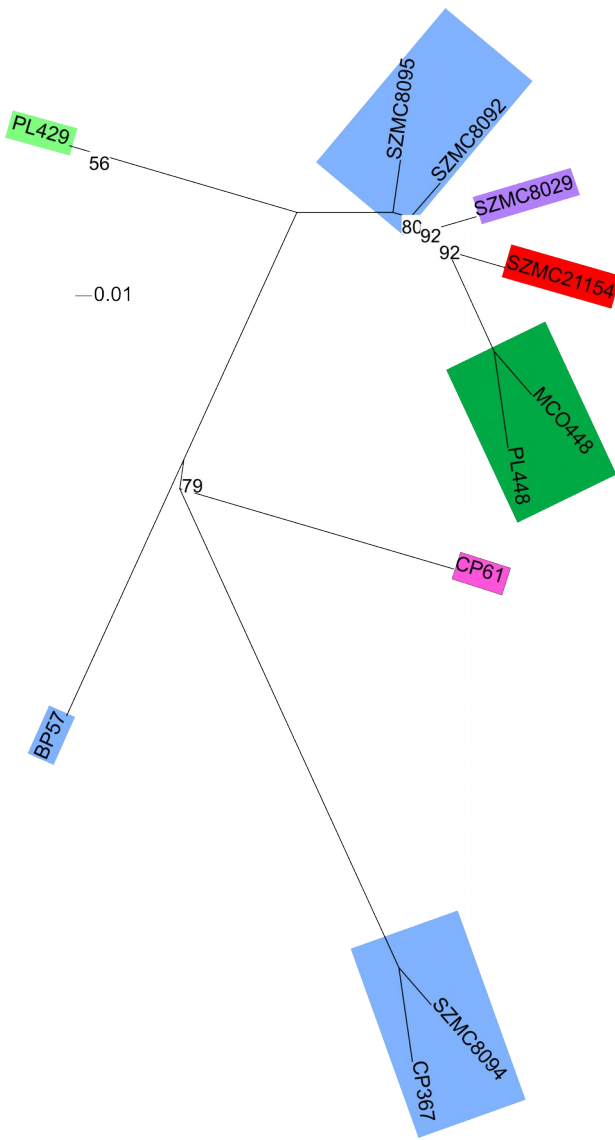**D**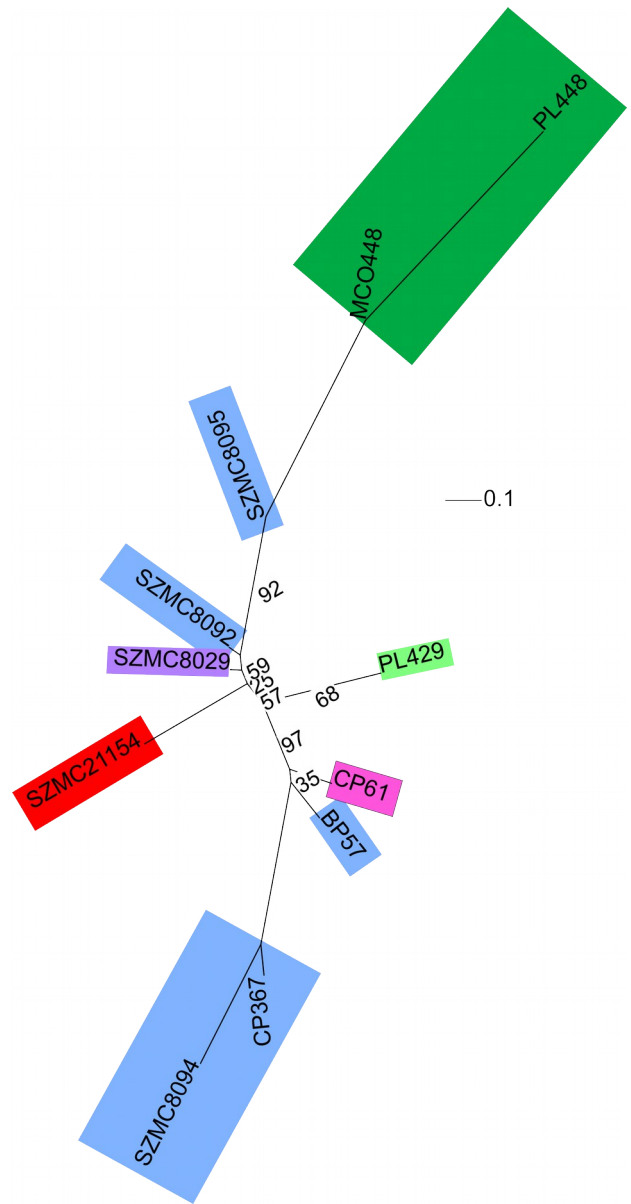

|                 |
|-----------------|
| Cataluna, ES    |
| Debrecen, HU    |
| Pécs, HU        |
| Pisa, IT        |
| Livermore, USA  |
| Washington, USA |

E

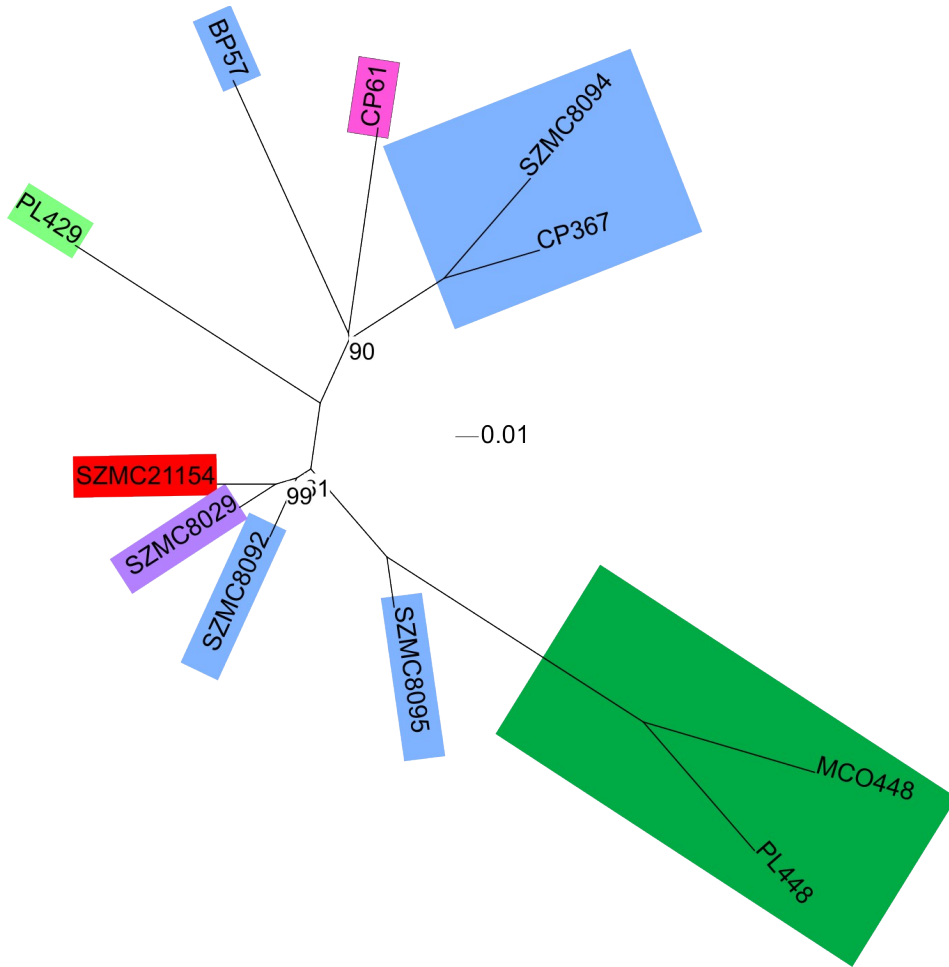

|                 |
|-----------------|
| Cataluna, ES    |
| Debrecen, HU    |
| Pécs, HU        |
| Pisa, IT        |
| Livermore, USA  |
| Washington, USA |
