# Supplementary material for: The Genomic Aftermath of Hybridization in the Opportunistic Pathogen Candida metapsilosis
Source: PubMed Central journal article supplement (PMC4627764; doi:10.1371/journal.pgen.1005626), 2015-10-30

**A**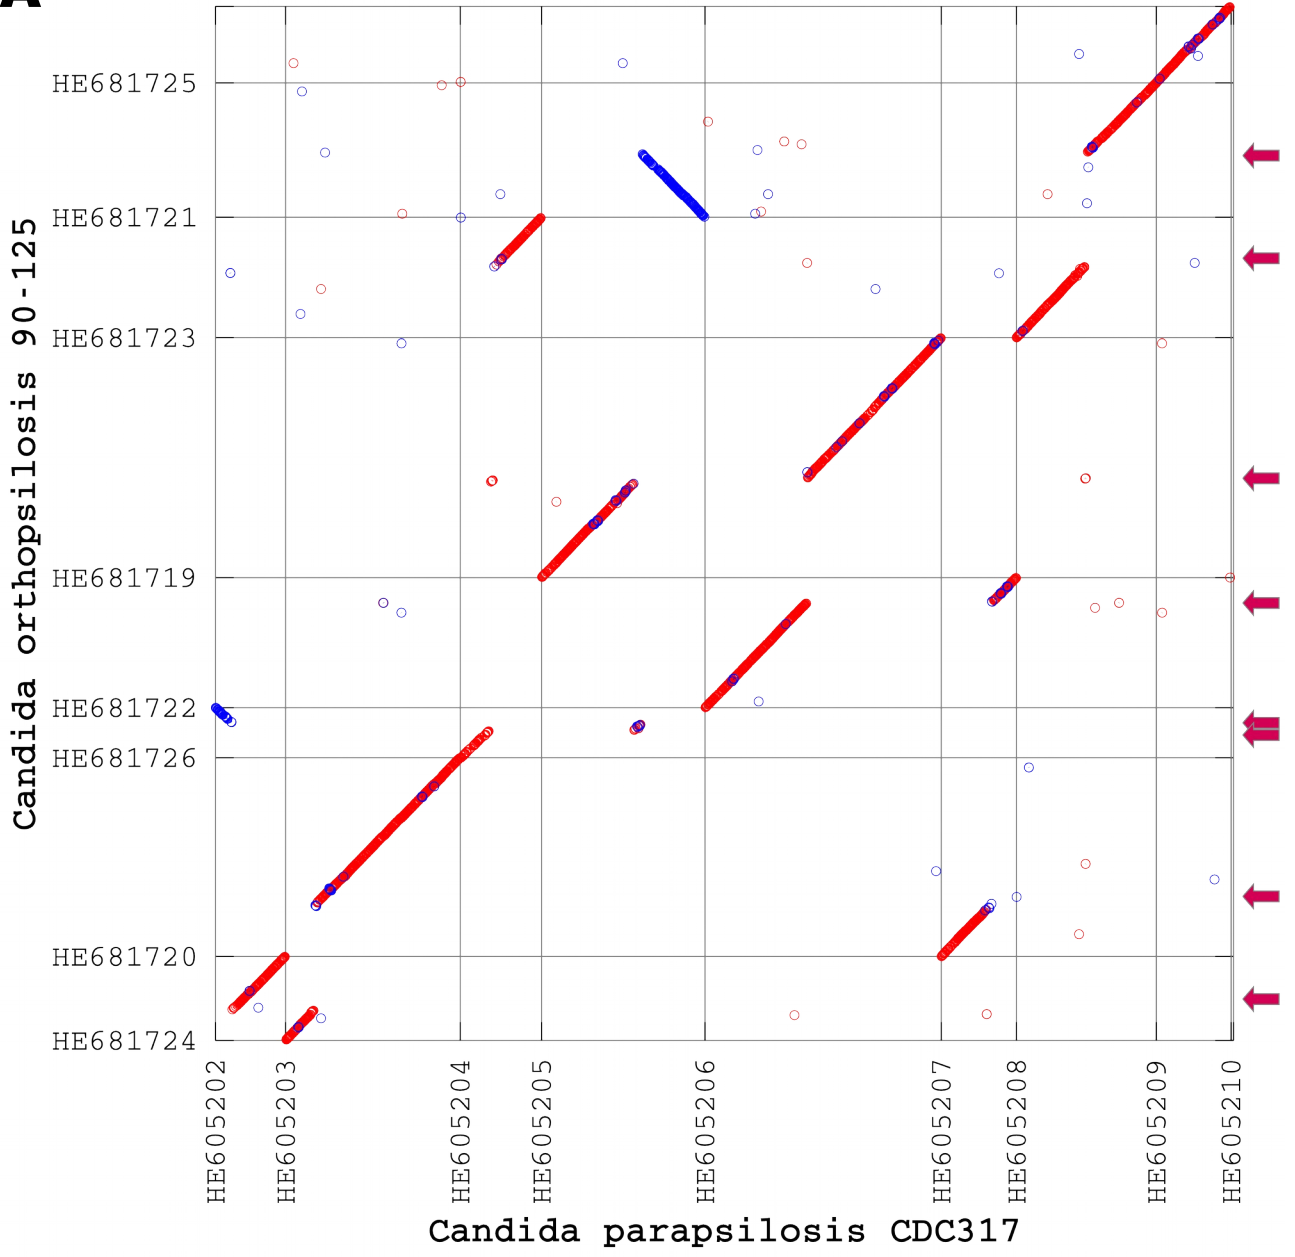

**B****Candida metapsilosis** SZMC8094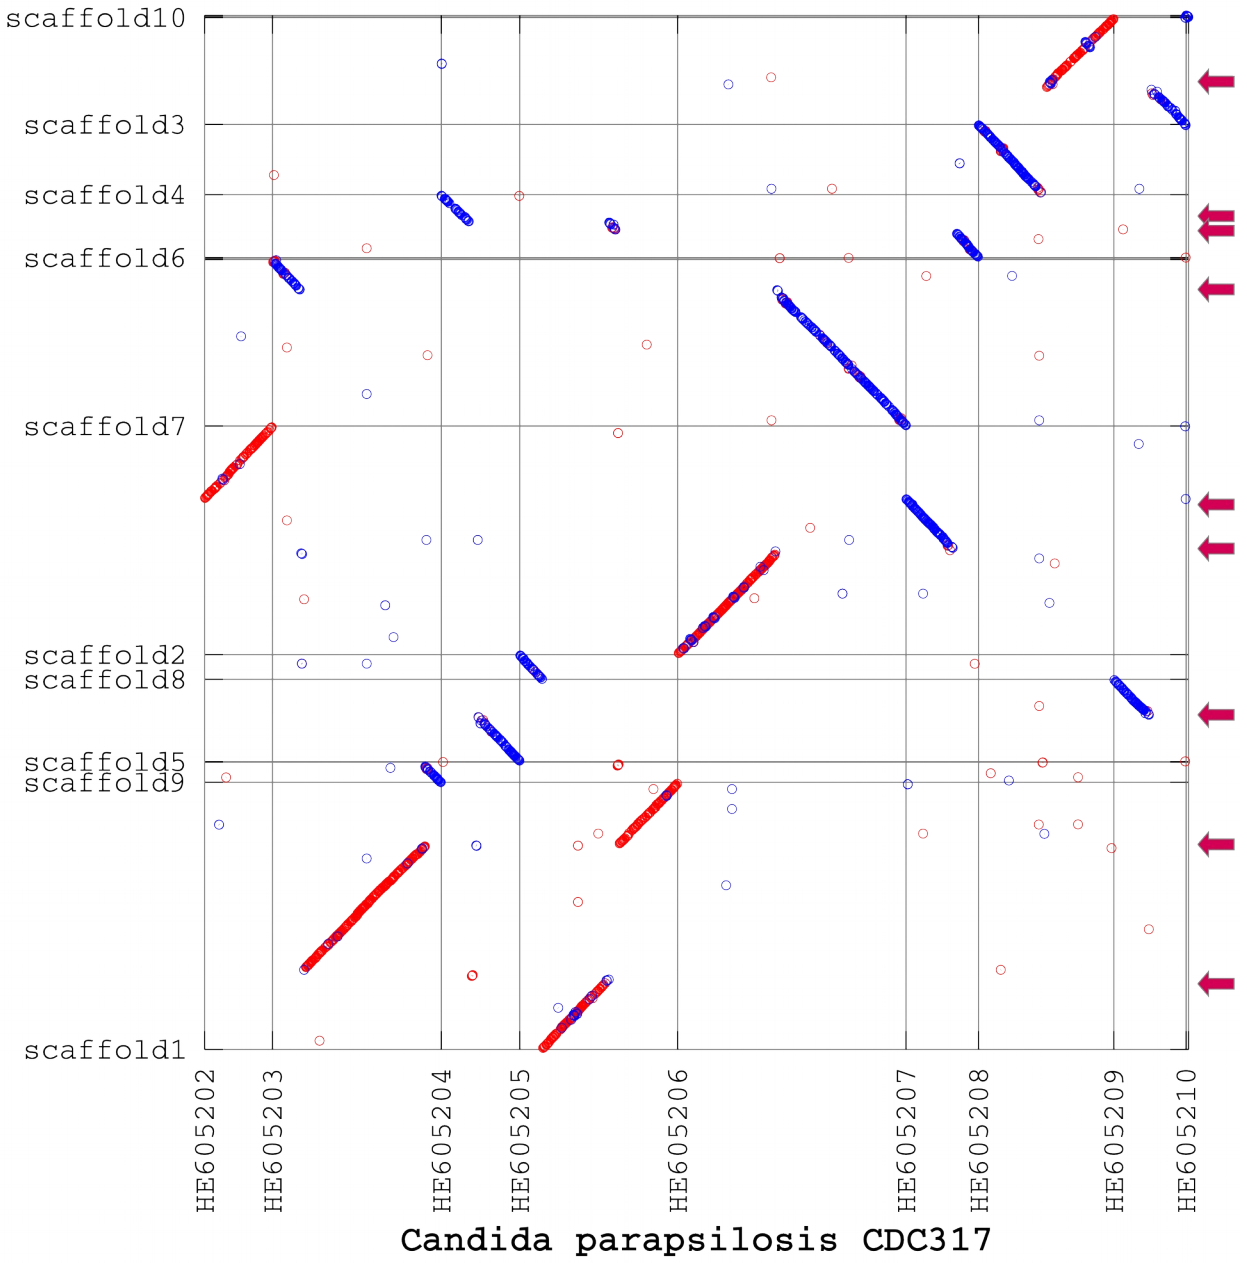

C

*Candida metapsilosis* SZMC8094

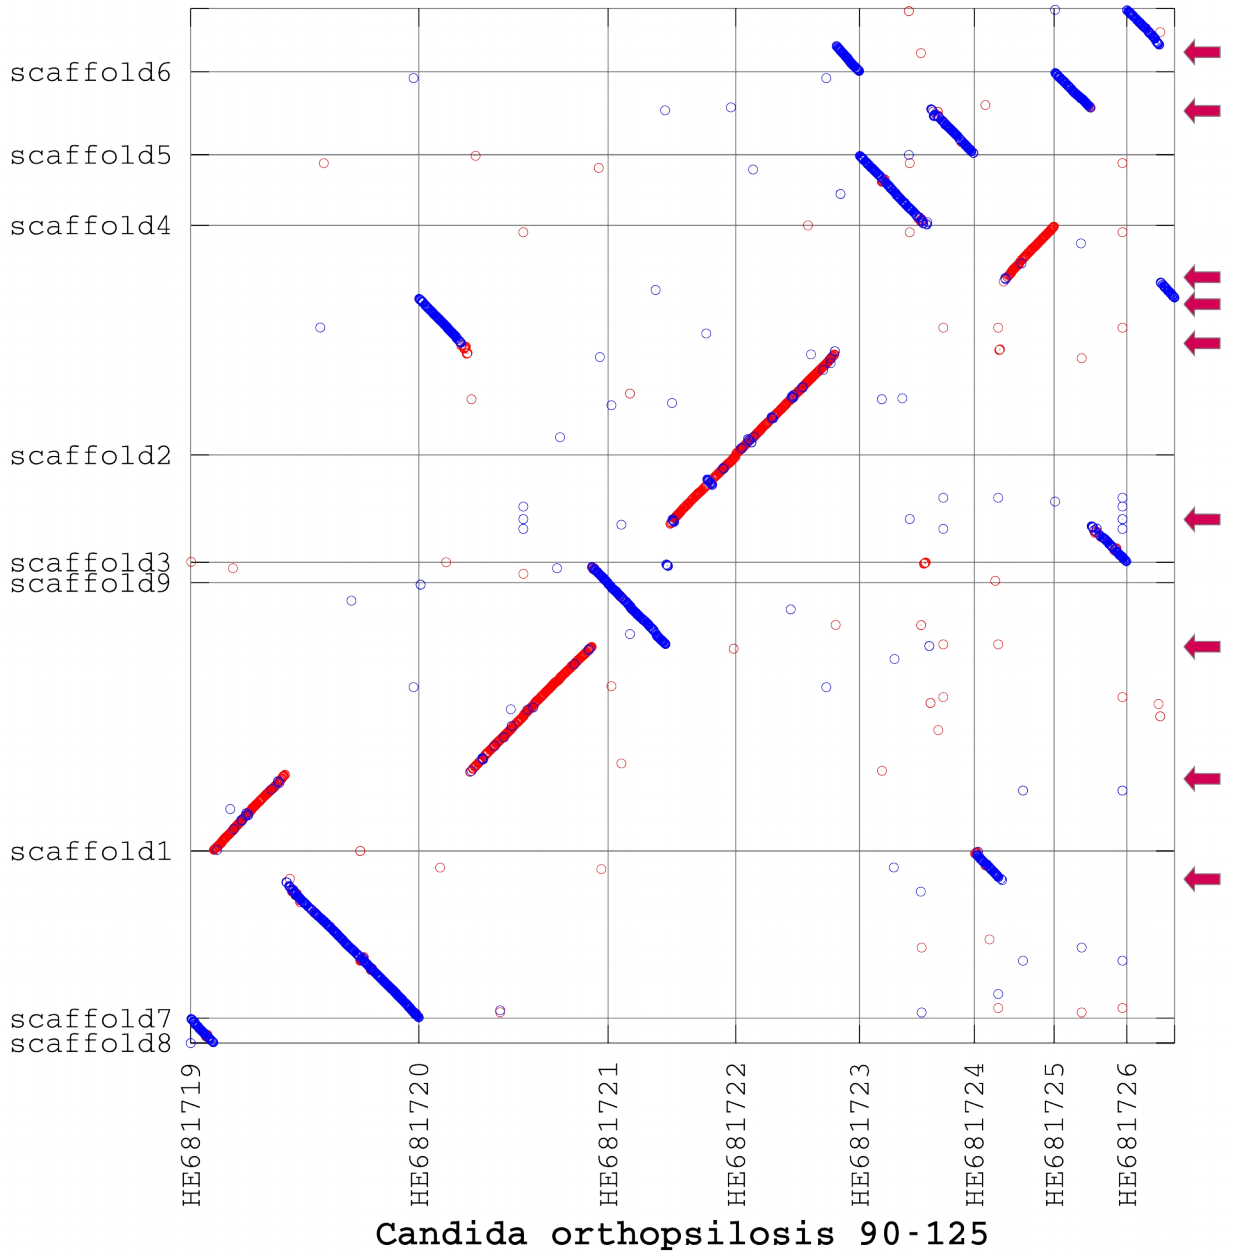

Supplement: pgen.1005626.s012.pdf [file pgen.1005626.s012.pdf]
