# Supplementary material for: The Genomic Aftermath of Hybridization in the Opportunistic Pathogen Candida metapsilosis
Source: PubMed Central journal article supplement (PMC4627764; doi:10.1371/journal.pgen.1005626), 2015-10-30
Supplement: pgen.1005626.s015.pdf [file pgen.1005626.s015.pdf]

| strain    | libraries                     | read length     | depth of coverage | k        | contigs | bases      | GC [%] | contigs >1kb | bases in contigs >1kb | N50    | N90   | Ns        | longest |
|-----------|-------------------------------|-----------------|-------------------|----------|---------|------------|--------|--------------|-----------------------|--------|-------|-----------|---------|
| PL429     | pe300                         | 76              | 412               | 63       | 14,975  | 21,989,545 | 37.94  | 4,199        | 19,092,291            | 10,535 | 3,928 | 513,678   | 186,352 |
| PL429     | pe400ov                       | 250             | 381               | 41 - 91  | 8,342   | 22,892,786 | 38.04  | 3,432        | 21,184,119            | 8,890  | 1,435 | 30,053    | 162,895 |
| PL429     | pe300; pe400ov                | 76; ~400        | 793               | 31 - 61  | 7,792   | 22,742,173 | 38.04  | 3,515        | 21,186,109            | 8,677  | 1,535 | 28,645    | 177,697 |
| PL429     | pe300; pe600; mp5000; pe400ov | 76; 46; 46; 250 | 1,308             | 31 - 127 | 24,925  | 25,093,078 | 38.04  | 6,831        | 19,130,027            | 2,539  | 292   | 0         | 21,506  |
| BP57      | pe600                         | 96              | 293               | 41 - 91  | 29,646  | 28,329,180 | 37.91  | 3,999        | 22,735,456            | 7,042  | 211   | 903,163   | 324,054 |
| CP367     | pe600                         | 96              | 265               | 41 - 91  | 12,801  | 24,371,510 | 37.99  | 3,291        | 22,043,223            | 9,870  | 1,086 | 940,164   | 247,133 |
| CP61      | pe600                         | 96              | 273               | 41 - 91  | 20,198  | 26,547,316 | 37.93  | 3,919        | 22,536,014            | 7,799  | 460   | 875,009   | 232,624 |
| SZMC21154 | pe600                         | 96              | 569               | 41 - 91  | 11,374  | 23,253,387 | 37.87  | 2,169        | 21,488,133            | 17,832 | 1,867 | 212,077   | 310,367 |
| SZMC8029  | pe600                         | 96              | 500               | 41 - 91  | 10,162  | 23,352,175 | 37.92  | 2,187        | 21,774,098            | 18,288 | 2,242 | 213,676   | 294,346 |
| SZMC8092  | pe600                         | 96              | 568               | 41 - 91  | 15,400  | 24,194,700 | 37.92  | 2,298        | 21,598,491            | 15,444 | 791   | 491,088   | 294,138 |
| SZMC8094  | pe600                         | 96              | 467               | 41 - 91  | 10,526  | 23,742,002 | 37.98  | 2,181        | 22,057,154            | 18,631 | 1,991 | 265,018   | 294,315 |
| SZMC8095  | pe600                         | 96              | 575               | 41 - 91  | 16,237  | 24,345,721 | 38.02  | 2,314        | 21,655,210            | 14,867 | 721   | 436,559   | 294,103 |
| MCO448    | pe600                         | 46              | 200               | 31 - 41  | 38,268  | 25,662,059 | 38.23  | 4,558        | 18,912,731            | 3,704  | 168   | 5,621,182 | 98,928  |
| PL448     | pe600                         | 46              | 212               | 31 - 41  | 44,777  | 24,993,393 | 38.01  | 4,255        | 17,145,966            | 3,001  | 153   | 4,433,373 | 246,982 |
