# Supplementary material for: The Genomic Aftermath of Hybridization in the Opportunistic Pathogen Candida metapsilosis
Source: PubMed Central journal article supplement (PMC4627764; doi:10.1371/journal.pgen.1005626), 2015-10-30
Supplement: pgen.1005626.s016.pdf [file pgen.1005626.s016.pdf]

| step        | file_name                                   | contigs | bases      | GC [%] | contigs >1kb | bases in contigs >1kb | N50       | N90     | Ns      | longest contig |
|-------------|---------------------------------------------|---------|------------|--------|--------------|-----------------------|-----------|---------|---------|----------------|
| SOAP2       | SZMC8094.k41-91.scafSeq                     | 10,526  | 23,742,002 | 37.98  | 2,181        | 22,057,154            | 18,631    | 1,991   | 265,018 | 294,315        |
| GapCloser   | SZMC8094.k41-91.gf1.scafSeq                 | 10,526  | 23,690,189 | 37.96  | 2,181        | 22,005,328            | 18,526    | 1,984   | 9,127   | 295,590        |
| HaploMerger | SZMC8094/genome.fa                          | 2,181   | 22,057,154 | 38.03  | 2,181        | 22,057,154            | 20,538    | 4,382   | 261,056 | 294,315        |
| HaploMerger | SZMC8094/assembly_hapA.fa                   | 714     | 9,758,829  | 38.05  | 712          | 9,757,071             | 23,399    | 6,516   | 135,647 | 123,420        |
| HaploMerger | SZMC8094/assembly_hapB.fa                   | 879     | 9,078,461  | 38.04  | 870          | 9,070,778             | 18,136    | 4,963   | 101,935 | 119,989        |
| HaploMerger | SZMC8094/optiNewScaffolds.fa                | 692     | 9,803,606  | 38.05  | 692          | 9,803,606             | 25,041    | 6,671   | 135,820 | 123,420        |
| HaploMerger | SZMC8094/unpaired.fa                        | 628     | 3,204,737  | 37.96  | 612          | 3,193,430             | 11,648    | 1,753   | 23,082  | 294,315        |
| HaploMerger | SZMC8094/genome.new.fa                      | 1,320   | 13,008,343 | 38.03  | 1,304        | 12,997,036            | 23,367    | 3,875   | 158,902 | 294,315        |
| SSPACE      | SZMC8094/ite0.final.scaffolds.fasta         | 1,320   | 13,008,343 | 38.03  | 1,304        | 12,997,036            | 23,367    | 3,875   | 158,902 | 294,315        |
| SSPACE      | SZMC8094/ite1.final.scaffolds.fasta         | 501     | 13,026,833 | 38.03  | 489          | 13,017,925            | 49,732    | 13,855  | 177,829 | 323,764        |
| SSPACE      | SZMC8094/ite2.final.scaffolds.fasta         | 501     | 13,026,833 | 38.03  | 489          | 13,017,925            | 49,732    | 13,855  | 177,829 | 323,764        |
| SSPACE      | SZMC8094/ite2.0.final.scaffolds.fasta       | 501     | 13,026,833 | 38.03  | 489          | 13,017,925            | 49,732    | 13,855  | 177,829 | 323,764        |
| SSPACE      | SZMC8094/ite2.1.final.scaffolds.fasta       | 84      | 13,401,073 | 38.03  | 73           | 13,392,897            | 784,089   | 252,448 | 552,069 | 1,447,475      |
| SSPACE      | SZMC8094/ite2.2.final.scaffolds.fasta       | 70      | 13,416,493 | 38.03  | 59           | 13,408,317            | 837,157   | 317,314 | 567,489 | 3,446,298      |
| SSPACE      | SZMC8094/fosmid.final.scaffolds.fasta       | 57      | 13,511,817 | 38.03  | 46           | 13,503,641            | 2,161,850 | 820,601 | 662,813 | 3,459,122      |
| GapCloser   | SZMC8094/fosmid.final.scaffolds.gf0.fasta   | 57      | 13,511,817 | 38.03  | 46           | 13,503,641            | 2,161,850 | 820,601 | 662,813 | 3,459,122      |
| GapCloser   | SZMC8094/fosmid.final.scaffolds.gf1.fasta   | 57      | 13,386,121 | 38.00  | 46           | 13,378,335            | 2,137,174 | 810,252 | 88,149  | 3,427,824      |
| GapCloser   | SZMC8094/fosmid.final.scaffolds.gf2.fasta   | 57      | 13,387,922 | 38.00  | 46           | 13,380,134            | 2,137,334 | 810,769 | 87,055  | 3,428,185      |
| GapCloser   | SZMC8094/fosmid.final.scaffolds.gf2.1.fasta | 57      | 13,392,383 | 38.00  | 46           | 13,384,593            | 2,138,427 | 810,870 | 59,223  | 3,429,230      |
| GapCloser   | SZMC8094/fosmid.final.scaffolds.gf2.2.fasta | 57      | 13,392,600 | 38.00  | 46           | 13,384,808            | 2,138,593 | 810,922 | 57,663  | 3,429,510      |
| GapCloser   | SZMC8094/fosmid.final.scaffolds.gf2.3.fasta | 57      | 13,393,615 | 38.00  | 46           | 13,385,821            | 2,138,759 | 810,974 | 57,662  | 3,429,874      |
