# Supplementary material for: The Genomic Aftermath of Hybridization in the Opportunistic Pathogen Candida metapsilosis
Source: PubMed Central journal article supplement (PMC4627764; doi:10.1371/journal.pgen.1005626), 2015-10-30
Supplement: pgen.1005626.s017.pdf [file pgen.1005626.s017.pdf]

| chromosome [1]               | MCO448       | PL448        | BP57         | CP367        | CP61         | SZMC21154    | SZMC8029     | SZMC8092     | SZMC8094     | SZMC8095    | PL429<br>pe300 | PL429<br>pe400ov | PL429<br>pe600 | PL429<br>mp5000 | PL429<br>fosmid | comments                    |
|------------------------------|--------------|--------------|--------------|--------------|--------------|--------------|--------------|--------------|--------------|-------------|----------------|------------------|----------------|-----------------|-----------------|-----------------------------|
| scaffold1 size3459122        | 1.94         | 1.80         | 1.97         | 1.95         | 1.97         | 1.80         | 1.95         | 1.97         | 1.90         | 2.01        | 1.92           | 1.95             | 1.98           | 1.98            | 2.04            |                             |
| scaffold2 size2959145        | 1.99         | <b>2.16</b>  | 1.96         | 1.96         | 1.95         | <b>2.39</b>  | 1.94         | 1.95         | 1.99         | 1.94        | 1.90           | 1.92             | 1.94           | 1.96            | 1.90            |                             |
| scaffold7 size2161850        | 1.89         | 1.78         | 1.94         | 1.92         | 1.93         | 1.75         | 1.90         | 1.91         | 1.89         | 1.90        | 1.87           | 1.90             | 1.90           | 1.92            | 2.09            |                             |
| scaffold3 size1388033        | 1.91         | 1.80         | 1.91         | 1.92         | 1.92         | 1.77         | 1.90         | 1.93         | 1.94         | 1.92        | 1.86           | 1.93             | 1.87           | 1.90            | 1.85            |                             |
| scaffold5 size1063617<br>[2] | <b>2.39</b>  | <b>3.08</b>  | <b>2.32</b>  | <b>2.34</b>  | <b>2.34</b>  | <b>2.25</b>  | <b>2.32</b>  | <b>2.35</b>  | <b>2.38</b>  | <b>2.36</b> | <b>2.21</b>    | <b>2.44</b>      | <b>2.24</b>    | <b>2.44</b>     | 2.05            | rDNA                        |
| scaffold4 size908642         | 1.91         | 1.79         | 1.94         | 1.96         | 1.94         | 1.77         | 1.92         | 1.93         | 1.95         | 1.91        | 1.87           | 1.94             | 1.91           | 1.94            | 1.74            |                             |
| scaffold6 size820601         | <b>2.23</b>  | 2.03         | 2.02         | 2.12         | 1.99         | 1.89         | 2.05         | 2.04         | <b>2.20</b>  | 2.07        | 2.00           | 2.07             | 2.04           | 2.09            | <b>2.38</b>     |                             |
| scaffold8 size317314         | <b>2.26</b>  | 2.01         | 2.00         | 1.99         | 1.98         | 1.88         | 2.01         | 2.02         | 2.16         | 2.13        | 1.97           | 2.03             | 2.01           | 2.11            | 2.15            |                             |
| scaffold9 size263853         | 2.15         | 2.06         | 1.96         | 1.99         | 1.96         | 1.79         | 1.93         | 1.96         | 2.11         | 1.99        | 1.93           | 1.95             | 1.96           | 2.04            | 1.86            |                             |
| scaffold10 size21864<br>[3]  | 1.80         | 1.99         | <b>14.78</b> | <b>8.33</b>  | <b>16.18</b> | <b>27.67</b> | <b>24.11</b> | <b>15.26</b> | <b>6.58</b>  | <b>9.83</b> | <b>48.78</b>   | <b>13.56</b>     | <b>23.07</b>   | <b>6.87</b>     | 0.00            | mitochondrial<br>chromosome |
| scaffold11 size20967         | 2.09         | 1.81         | 1.65         | 1.76         | 1.74         | 1.63         | 1.76         | 1.80         | 1.92         | 2.02        | 1.71           | 1.72             | 1.76           | 1.84            | 1.74            |                             |
| scaffold12 size15030         | <b>1.25</b>  | <b>1.09</b>  | <b>1.22</b>  | <b>1.24</b>  | <b>1.19</b>  | <b>1.11</b>  | <b>1.20</b>  | <b>1.21</b>  | <b>1.30</b>  | <b>1.27</b> | <b>1.17</b>    | <b>1.23</b>      | <b>1.16</b>    | <b>0.97</b>     | <b>3.89</b>     |                             |
| scaffold13 size9895          | 1.75         | 1.80         | <b>1.34</b>  | <b>1.98</b>  | <b>1.22</b>  | <b>2.12</b>  | <b>0.38</b>  | <b>1.31</b>  | <b>1.46</b>  | <b>1.27</b> | <b>2.02</b>    | <b>1.69</b>      | <b>1.76</b>    | <b>1.74</b>     | <b>0.00</b>     |                             |
| scaffold14 size8524          | 1.65         | <b>2.30</b>  | 1.76         | 1.71         | 1.73         | 1.74         | 1.86         | 1.83         | 1.77         | 1.76        | 1.84           | 1.67             | 1.69           | 1.79            | 0.69            |                             |
| scaffold16 size6993          | <b>0.87</b>  | 1.53         | 1.95         | 1.69         | 1.50         | <b>2.89</b>  | <b>3.63</b>  | <b>2.22</b>  | <b>1.24</b>  | <b>1.49</b> | <b>3.56</b>    | <b>2.61</b>      | <b>3.47</b>    | <b>2.66</b>     | <b>8.39</b>     |                             |
| scaffold15 size7016          | 2.02         | 2.16         | 1.70         | 1.91         | 1.72         | 1.76         | 1.62         | 1.65         | 1.83         | 1.86        | <b>1.42</b>    | 1.80             | <b>1.34</b>    | <b>1.34</b>     | 0.97            |                             |
| scaffold17 size5362          | <b>2.97</b>  | <b>2.88</b>  | <b>2.46</b>  | <b>3.04</b>  | <b>1.07</b>  | <b>3.37</b>  | 1.79         | 1.66         | 1.94         | <b>1.46</b> | <b>2.79</b>    | <b>2.50</b>      | <b>2.54</b>    | 1.92            | 0.00            |                             |
| scaffold18 size4846          | 1.83         | 2.80         | <b>2.77</b>  | <b>0.93</b>  | 1.75         | <b>4.72</b>  | <b>5.02</b>  | <b>5.02</b>  | <b>4.73</b>  | <b>5.42</b> | 0.00           | 8.87             | 8.67           | 1.73            | 0.00            |                             |
| scaffold45 size1071          | <b>22.49</b> | <b>23.70</b> | <b>9.07</b>  | <b>52.99</b> | <b>8.56</b>  | <b>7.76</b>  | <b>8.98</b>  | <b>8.80</b>  | <b>48.46</b> | <b>6.70</b> | <b>14.62</b>   | <b>9.47</b>      | <b>18.46</b>   | <b>4.66</b>     | <b>12.93</b>    |                             |
| scaffold48 size920           | 5.10         | 5.34         | 2.00         | 4.32         | 0.39         | 2.76         | 3.09         | 2.93         | 2.99         | 3.33        | 1.73           | <b>2.42</b>      | 2.05           | 0.74            | 0.00            |                             |
| scaffold54 size588           | 2.80         | <b>3.35</b>  | <b>1.34</b>  | <b>5.47</b>  | <b>1.08</b>  | <b>2.39</b>  | 1.98         | <b>2.85</b>  | <b>4.29</b>  | <b>1.43</b> | <b>5.50</b>    | <b>7.95</b>      | 2.05           | <b>2.98</b>     | <b>29.87</b>    |                             |
| scaffold19 size3739          | 0.48         | 1.04         | 1.55         | 2.05         | 1.68         | 0.26         | 0.29         | 0.28         | 1.97         | 0.33        | 1.86           | <b>2.67</b>      | 1.50           | 2.14            | 3.13            |                             |
| scaffold20 size3160          | 0.76         | 1.68         | 1.51         | 0.85         | <b>2.36</b>  | 1.55         | 1.59         | 1.00         | 0.72         | 0.88        | 1.30           | 0.82             | 1.25           | 0.48            | 0.00            |                             |
| scaffold21 size3072          | 1.37         | 1.31         | 0.97         | 1.25         | 1.00         | 0.94         | 0.96         | 0.96         | 1.07         | 1.14        | 1.06           | 1.55             | 0.89           | 0.91            | <b>3.81</b>     |                             |
| scaffold22 size2988          | 0.94         | 0.98         | 0.87         | 0.82         | 0.95         | 0.92         | 0.81         | 1.04         | 0.98         | 0.98        | 1.05           | 1.03             | 0.86           | 0.41            | 0.00            |                             |
| scaffold23 size2932          | 0.33         | 0.26         | 1.27         | 1.40         | 0.68         | 1.06         | 0.71         | 0.60         | <b>1.76</b>  | 0.70        | 0.55           | <b>3.34</b>      | 0.15           | 0.56            | <b>29.95</b>    |                             |
| scaffold24 size2890          | 0.04         | 0.03         | 0.99         | 1.15         | 1.00         | 0.05         | 0.02         | 0.02         | 1.37         | 0.03        | 0.03           | 0.10             | 0.02           | 0.03            | 0.00            |                             |
| scaffold25 size2889          | 0.74         | 0.77         | 0.95         | 0.88         | 0.95         | 0.69         | 0.85         | 0.83         | 0.90         | 0.74        | 0.72           | 0.68             | 0.79           | 0.56            | 0.00            |                             |
| scaffold26 size2760          | 1.22         | 1.08         | 0.73         | 0.82         | 0.76         | 0.75         | 0.85         | 0.82         | 0.89         | 1.03        | 0.77           | 1.14             | 0.64           | 0.61            | 0.00            |                             |
| scaffold27 size2613          | 0.01         | 0.01         | 0.97         | 1.02         | 1.00         | 0.00         | 0.00         | 0.00         | 0.99         | 0.00        | 0.01           | 0.01             | 0.01           | 0.01            | 0.00            |                             |
| scaffold28 size2552          | 0.96         | 0.86         | 1.08         | 0.92         | 1.02         | 0.00         | 1.01         | 1.07         | 1.06         | 0.96        | 0.98           | 0.96             | 1.05           | 0.99            | 0.00            |                             |
| scaffold29 size2468          | 1.53         | 1.48         | 1.62         | 1.49         | 1.62         | <b>2.20</b>  | 1.59         | 1.58         | 1.41         | 1.51        | 0.87           | 0.82             | 0.79           | 0.42            | <b>2.37</b>     |                             |
| scaffold30 size2308          | 0.73         | 0.93         | 1.02         | 0.86         | 0.98         | 0.88         | 0.90         | 0.94         | 0.86         | 0.78        | 1.06           | 0.89             | 1.07           | 1.00            | 0.00            |                             |
| scaffold31 size2209          | 0.52         | 0.46         | 1.64         | 1.31         | 1.64         | 0.73         | 0.82         | 0.84         | <b>1.58</b>  | 0.82        | 0.66           | 0.78             | 0.52           | 0.34            | <b>2.65</b>     |                             |
| scaffold32 size2198          | 0.22         | 0.34         | 0.62         | 1.00         | 1.08         | 0.40         | 1.10         | 1.10         | 1.03         | 0.91        | 1.44           | 0.76             | 1.27           | 0.72            | 0.00            |                             |
| scaffold33 size2195          | 1.03         | 0.98         | 1.57         | 0.86         | 0.39         | 1.67         | 1.83         | 1.00         | 0.89         | 0.97        | 1.10           | 1.09             | 1.03           | 0.82            | <b>2.67</b>     |                             |
| scaffold34 size2195          | 0.86         | 0.74         | 0.84         | 0.75         | 0.81         | 0.72         | 0.73         | 0.78         | 0.77         | 0.85        | 0.41           | 0.43             | 0.36           | 0.07            | 0.00            |                             |
| scaffold35 size2060          | 0.99         | 0.82         | 0.81         | 0.88         | 0.82         | 0.70         | 0.77         | 0.77         | 0.86         | 0.82        | 0.94           | 0.87             | 0.82           | 0.30            | 0.00            |                             |
| scaffold36 size1996          | 0.90         | 1.60         | 0.84         | 0.78         | 0.85         | 0.79         | 1.64         | 0.87         | 0.94         | 0.05        | 0.91           | 0.97             | 0.88           | 0.73            | 0.00            |                             |
| scaffold37 size1869          | 1.39         | 1.53         | 1.08         | 1.79         | 1.80         | 1.88         | 2.00         | 2.13         | <b>3.00</b>  | 1.97        | 1.86           | 1.80             | 1.90           | 1.38            | <b>3.13</b>     |                             |

|                     |      |      |      |      |      |      |      |      |      |      |      |      |      |      |       |
|---------------------|------|------|------|------|------|------|------|------|------|------|------|------|------|------|-------|
| scaffold38 size1589 | 2.24 | 1.85 | 0.55 | 1.54 | 1.38 | 1.67 | 1.72 | 1.73 | 1.59 | 2.09 | 2.44 | 2.14 | 1.91 | 0.71 | 0.00  |
| scaffold39 size1516 | 1.72 | 1.35 | 1.17 | 1.36 | 1.29 | 1.68 | 1.30 | 1.25 | 1.39 | 1.51 | 1.12 | 1.12 | 0.82 | 0.51 | 0.00  |
| scaffold40 size1514 | 0.60 | 0.55 | 1.36 | 1.31 | 1.27 | 0.67 | 0.73 | 0.68 | 1.69 | 0.78 | 0.93 | 0.61 | 0.55 | 0.43 | 0.00  |
| scaffold41 size1479 | 1.84 | 1.64 | 1.38 | 1.70 | 1.54 | 1.47 | 1.54 | 1.59 | 1.66 | 1.69 | 1.98 | 2.44 | 1.37 | 1.08 | 0.00  |
| scaffold42 size1291 | 0.00 | 0.00 | 0.69 | 0.79 | 0.11 | 0.00 | 0.00 | 0.00 | 0.93 | 0.00 | 0.00 | 0.01 | 0.00 | 0.01 | 0.00  |
| scaffold43 size1245 | 1.97 | 1.72 | 1.53 | 1.50 | 1.38 | 1.20 | 1.26 | 1.34 | 1.41 | 1.53 | 1.67 | 2.18 | 1.33 | 0.79 | 0.00  |
| scaffold44 size1158 | 0.00 | 0.00 | 0.87 | 0.98 | 0.93 | 0.00 | 0.00 | 0.00 | 1.03 | 0.00 | 0.00 | 0.00 | 0.00 | 0.00 | 0.00  |
| scaffold46 size1011 | 1.45 | 1.26 | 0.83 | 1.21 | 1.07 | 1.02 | 1.09 | 1.01 | 1.11 | 1.15 | 1.39 | 1.70 | 0.77 | 1.00 | 5.79  |
| scaffold47 size994  | 0.53 | 0.82 | 1.27 | 1.05 | 1.31 | 1.27 | 1.21 | 1.19 | 0.66 | 0.60 | 1.74 | 1.46 | 1.30 | 1.22 | 11.78 |
| scaffold49 size918  | 1.09 | 1.01 | 0.95 | 0.85 | 0.97 | 0.86 | 0.92 | 0.93 | 0.89 | 0.15 | 1.51 | 1.41 | 1.07 | 1.23 | 6.38  |
| scaffold50 size882  | 0.53 | 0.87 | 1.41 | 1.43 | 0.73 | 0.71 | 0.79 | 0.85 | 0.83 | 0.47 | 0.81 | 0.74 | 0.92 | 1.05 | 0.00  |
| scaffold51 size796  | 0.01 | 0.01 | 0.69 | 0.82 | 0.72 | 0.00 | 0.00 | 0.00 | 0.86 | 0.00 | 0.01 | 0.00 | 0.00 | 0.04 | 0.00  |
| scaffold52 size792  | 0.00 | 0.00 | 1.08 | 0.91 | 1.10 | 0.00 | 0.00 | 0.00 | 1.02 | 0.00 | 0.00 | 0.00 | 0.00 | 0.00 | 0.00  |
| scaffold53 size677  | 0.76 | 1.27 | 1.36 | 1.43 | 1.17 | 1.31 | 1.85 | 1.35 | 0.81 | 0.69 | 1.73 | 0.84 | 2.02 | 2.21 | 8.59  |
| scaffold55 size569  | 0.71 | 1.03 | 0.96 | 1.14 | 1.10 | 1.09 | 1.17 | 1.14 | 0.83 | 0.76 | 1.23 | 1.06 | 1.07 | 1.13 | 20.58 |
| scaffold56 size522  | 0.83 | 0.77 | 0.78 | 0.73 | 0.76 | 1.28 | 0.75 | 0.65 | 0.65 | 0.67 | 1.93 | 1.91 | 1.74 | 1.97 | 0.00  |
| scaffold57 size518  | 0.01 | 0.18 | 0.05 | 0.02 | 0.08 | 0.03 | 0.01 | 0.04 | 0.00 | 0.02 | 0.05 | 0.02 | 0.10 | 1.69 | 0.00  |

[1] core chromosomes are in bold

[2] rDNA cluster

[3] mtDNA is highly dependant on DNA isolation technique, if nuclear DNA was enriched, little or no mtDNA is expected to be sequenced
