# Supplementary material for: The Genomic Aftermath of Hybridization in the Opportunistic Pathogen Candida metapsilosis
Source: PubMed Central journal article supplement (PMC4627764; doi:10.1371/journal.pgen.1005626), 2015-10-30
Supplement: pgen.1005626.s018.pdf [file pgen.1005626.s018.pdf]

| #name | chrom                 | start     | end       | size  | strains no | affected strains                                                                                                      | ploidies                                                                    | null DEL in some | affected genes                   | functions                                                                                                                                                                                                                                                                                                                                                                                                                                                            | comments            | LEGEND            | Supplementary file 3 |
|-------|-----------------------|-----------|-----------|-------|------------|-----------------------------------------------------------------------------------------------------------------------|-----------------------------------------------------------------------------|------------------|----------------------------------|----------------------------------------------------------------------------------------------------------------------------------------------------------------------------------------------------------------------------------------------------------------------------------------------------------------------------------------------------------------------------------------------------------------------------------------------------------------------|---------------------|-------------------|----------------------|
| DUP1  | scaffold1 size3459122 | 56,900    | 58,200    | 1,300 | 11         | BP57 CP367 CP61 MCO448 PL429.300 PL429.5000 PL429.600 PL429.miseq PL448 SZMC21154 SZMC8029 SZMC8092 SZMC8094 SZMC8095 | 3.36 3.71 3.22 5.24 2.89<br>4.52 3.23 4.28 3.88 3.37<br>3.73 3.79 4.06 4.51 |                  | g4454                            |                                                                                                                                                                                                                                                                                                                                                                                                                                                                      |                     | Agglutinin-like   |                      |
| DUP2  | scaffold1 size3459122 | 249,200   | 250,500   | 1,300 | 11         | BP57 CP367 CP61 MCO448 PL429.300 PL429.5000 PL429.600 PL429.miseq PL448 SZMC21154 SZMC8029 SZMC8092 SZMC8094 SZMC8095 | 3.86 4.35 3.78 4.92 3.38<br>3.83 3.83 4.09 3.88 3.48<br>3.82 3.93 4.36 4.45 |                  | g4542                            |                                                                                                                                                                                                                                                                                                                                                                                                                                                                      |                     | hyphally          |                      |
| DUP3  | scaffold1 size3459122 | 1,111,000 | 1,116,857 | 5,857 | 7          | BP57 CP61 PL429.300 PL429.5000 PL429.600 PL429.miseq SZMC21154 SZMC8029 SZMC8092 SZMC8095                             | 2.99 3.29 6.16 6.41 7.45<br>3.81 4.62 4.63 3.06 2.77                        |                  | g4914 g4915 g4916                | Retrotransposon gag protein; Cyclin PHO80-like                                                                                                                                                                                                                                                                                                                                                                                                                       |                     | Major facilitator |                      |
| DUP4  | scaffold1 size3459122 | 1,169,219 | 1,175,742 | 6,523 | 6          | BP57 CP61 PL429.300 PL429.5000 PL429.600 PL429.miseq SZMC8029 SZMC8092 SZMC8095                                       | 2.72 2.71 3.07 3.26 3.25<br>3.00 2.55 2.65 2.69                             |                  | g4937 g4938 g4939<br>g4940 g4941 | Endosulphine; Autophagy-related protein 3; NADH dehydrogenase [ubiquinone] (complex I), 21kDa subunit, fungi                                                                                                                                                                                                                                                                                                                                                         |                     | ABC transporter   | x                    |
| DUP5  | scaffold1 size3459122 | 2,355,300 | 2,356,700 | 1,400 | 9          | BP57 CP367 CP61 MCO448 PL429.5000 PL429.miseq SZMC8029 SZMC8092 SZMC8094 SZMC8095                                     | 3.83 3.75 3.95 2.90 2.67<br>3.28 2.67 2.76 3.97 3.14                        |                  | g5513                            | Major facilitator superfamily domain, general substrate transporter; Sugar/inositol transporter; General substrate transporter; Major facilitator superfamily domain; Sugar transporter, conserved site                                                                                                                                                                                                                                                              |                     | Lipase            |                      |
| DUP6  | scaffold1 size3459122 | 2,388,400 | 2,389,600 | 1,200 | 11         | BP57 CP367 CP61 MCO448 PL429.300 PL429.5000 PL429.600 PL429.miseq PL448 SZMC21154 SZMC8029 SZMC8092 SZMC8094 SZMC8095 | 3.50 3.34 3.35 3.76 3.10<br>3.55 3.17 3.83 3.18 2.97<br>3.22 3.36 3.22 3.66 |                  | g5526                            | Arsenical pump ATPase, ArsA/Get3; Anion-transporting ATPase-like domain                                                                                                                                                                                                                                                                                                                                                                                              | it's not ARR3       | Peptidase         |                      |
| DUP7  | scaffold1 size3459122 | 2,451,223 | 2,453,302 | 2,079 | 9          | BP57 CP61 MCO448 PL429.300 PL429.5000 PL429.600 PL429.miseq PL448 SZMC21154 SZMC8029 SZMC8092 SZMC8095                | 2.73 2.74 2.89 2.76 3.17<br>2.69 3.08 2.68 2.57 2.68<br>2.84 2.61           |                  | g5556 g5557 g5558                | Arrestin-like, N-terminal; Arrestin C-terminal-like domain; Transcription factor TFIIb; Cyclin-like; Transcription factor TFIIb, cyclin-like domain; Zinc finger, GATA-type; Transcription factor TFIIb, conserved site; Zinc finger, TFIIb-type; Monooxygenase, FAD-binding; Ubiquinone biosynthesis hydroxylase, UbiH/UbiF/VisC/COQ6, conserved site; Ubiquinone biosynthesis hydroxylase, UbiH/UbiF/VisC/COQ6; Aromatic-ring hydroxylase-like                     |                     |                   |                      |
| DUP8  | scaffold1 size3459122 | 2,762,400 | 2,764,000 | 1,600 | 11         | BP57 CP367 CP61 MCO448 PL429.300 PL429.5000 PL429.600 PL429.miseq PL448 SZMC21154 SZMC8029 SZMC8092 SZMC8094 SZMC8095 | 5.28 4.62 4.83 3.10 4.29<br>4.33 4.73 4.80 3.29 4.43<br>4.18 3.21 5.05 4.30 |                  | g5701                            |                                                                                                                                                                                                                                                                                                                                                                                                                                                                      |                     |                   |                      |
| DUP9  | scaffold1 size3459122 | 2,764,400 | 2,768,800 | 4,400 | 11         | BP57 CP367 CP61 MCO448 PL429.300 PL429.5000 PL429.600 PL429.miseq PL448 SZMC21154 SZMC8029 SZMC8092 SZMC8094 SZMC8095 | 4.13 3.13 3.91 4.70 3.79<br>3.94 3.76 5.18 4.40 4.05<br>4.09 3.96 3.31 4.63 |                  | g5702 g5703                      | Protein of unknown function DUF3445                                                                                                                                                                                                                                                                                                                                                                                                                                  |                     |                   |                      |
| DUP10 | scaffold1 size3459122 | 2,788,300 | 2,791,400 | 3,100 | 7          | BP57 CP367 MCO448 PL429.5000 PL429.600 PL429.miseq PL448 SZMC21154 SZMC8029                                           | 3.51 5.13 2.91 2.73 3.06<br>2.89 2.78 1.19 1.37                             |                  | g5708                            | Hyphally-regulated cell wall protein, N-terminal                                                                                                                                                                                                                                                                                                                                                                                                                     | large differences!! |                   |                      |
| DUP11 | scaffold1 size3459122 | 2,802,900 | 2,804,900 | 2,000 | 9          | BP57 CP367 MCO448 PL429.300 PL429.5000 PL429.600 PL448 SZMC8029 SZMC8092 SZMC8094 SZMC8095                            | 2.75 3.78 6.37 1.14 1.44<br>1.23 6.60 2.75 4.11 2.75<br>3.13                |                  | g5710                            | Hyphally-regulated cell wall protein, N-terminal                                                                                                                                                                                                                                                                                                                                                                                                                     | large differences!! |                   |                      |
| DUP12 | scaffold1 size3459122 | 2,810,500 | 2,812,800 | 2,300 | 9          | BP57 CP367 MCO448 PL429.300 PL429.5000 PL429.600 PL429.miseq SZMC21154 SZMC8029 SZMC8092 SZMC8094 SZMC8095            | 3.31 6.48 2.54 3.59 4.57<br>3.76 6.01 3.23 3.78 3.51<br>4.47 4.44           |                  | g5711                            | Hyphally-regulated cell wall protein, N-terminal                                                                                                                                                                                                                                                                                                                                                                                                                     |                     |                   |                      |
| DUP13 | scaffold1 size3459122 | 3,125,899 | 3,127,684 | 1,785 | 4          | BP57 MCO448 PL429.5000 PL429.miseq PL448                                                                              | 1.42 3.98 2.54 2.55 3.25                                                    |                  | g5835 g5836                      | Vanillyl-alcohol oxidase, C-terminal subdomain 2; FAD-binding, type 2; FAD-linked oxidase-like, C-terminal; FAD linked oxidase, N-terminal; FAD-linked oxidase, FAD-binding, subdomain 2; FAD-linked oxidase, C-terminal; FAD-binding, type 2, subdomain 1; FAD-linked oxidase, C-terminal; FAD-binding, type 2; FAD-linked oxidase-like, C-terminal; FAD linked oxidase, N-terminal; FAD-linked oxidase, FAD-binding, subdomain 2; FAD-binding, type 2, subdomain 1 |                     |                   |                      |
| DUP14 | scaffold1 size3459122 | 3,206,500 | 3,208,400 | 1,900 | 11         | BP57 CP367 CP61 MCO448 PL429.300 PL429.5000 PL429.600 PL429.miseq PL448 SZMC21154 SZMC8029 SZMC8092 SZMC8094 SZMC8095 | 4.28 3.32 4.64 5.81 5.52<br>6.16 5.76 6.61 5.18 6.18<br>5.73 6.04 4.08 7.48 |                  | g5874                            | DDE superfamily endonuclease, CENP-B-like                                                                                                                                                                                                                                                                                                                                                                                                                            |                     |                   |                      |
| DUP15 | scaffold1 size3459122 | 3,257,264 | 3,261,830 | 4,566 | 5          | CP367 PL429.300 PL429.5000 PL429.600 PL429.miseq PL448 SZMC8092 SZMC8094                                              | 2.76 3.46 3.87 3.59 3.19<br>1.42 1.41 2.58                                  |                  | g5899 g5901 g5900                | Major facilitator superfamily domain, general substrate transporter; General substrate transporter; Major facilitator superfamily domain; Major facilitator superfamily domain, general substrate transporter; Major facilitator superfamily; Major facilitator superfamily domain; Major facilitator superfamily domain, general substrate transporter; General substrate transporter; Major facilitator superfamily domain                                         |                     |                   |                      |
| DUP16 | scaffold1 size3459122 | 3,371,965 | 3,374,355 | 2,390 | 11         | BP57 CP367 CP61 MCO448 PL429.5000 PL448 SZMC21154 SZMC8029 SZMC8092 SZMC8094 SZMC8095                                 | 5.09 5.87 6.62 10.49<br>2.67 9.80 7.91 8.41 7.83<br>6.56 10.71              |                  | g5951                            |                                                                                                                                                                                                                                                                                                                                                                                                                                                                      |                     |                   |                      |
| DUP17 | scaffold1 size3459122 | 3,410,900 | 3,412,000 | 1,100 | 5          | MCO448 PL429.5000 PL429.miseq PL448 SZMC8094 SZMC8095                                                                 | 3.44 2.62 2.59 3.11 2.70<br>2.67                                            |                  | g5968                            | Eisosome protein 1                                                                                                                                                                                                                                                                                                                                                                                                                                                   |                     |                   |                      |
| DUP18 | scaffold1 size3459122 | 3,419,000 | 3,428,400 | 9,400 | 11         | BP57 CP367 CP61 MCO448 PL429.300 PL429.5000 PL429.600 PL448 SZMC21154 SZMC8029 SZMC8092 SZMC8094 SZMC8095             | 2.98 3.20 4.03 4.62 2.52<br>3.01 2.96 5.35 3.34 3.66<br>3.60 3.30 3.65      |                  | g5972 g5973                      | Leucine-rich repeat; Leucine rich repeat 4                                                                                                                                                                                                                                                                                                                                                                                                                           |                     |                   |                      |

|       |                       |           |           |        |    |                                                                                                                                |                                                                                  |  |                                  |                                                                                                                                                                                                                                                                                                                                                                                                                                                                                                                                                                                                                                                                                                                                                                           |  |  |  |
|-------|-----------------------|-----------|-----------|--------|----|--------------------------------------------------------------------------------------------------------------------------------|----------------------------------------------------------------------------------|--|----------------------------------|---------------------------------------------------------------------------------------------------------------------------------------------------------------------------------------------------------------------------------------------------------------------------------------------------------------------------------------------------------------------------------------------------------------------------------------------------------------------------------------------------------------------------------------------------------------------------------------------------------------------------------------------------------------------------------------------------------------------------------------------------------------------------|--|--|--|
| DUP19 | scaffold2 size2959145 | 23,500    | 25,400    | 1,900  | 6  | CP367 MCO448 PL429.5000<br>PL429.miseq PL448 SZMC21154<br>SZMC8094                                                             | 2.56 3.48 2.83 2.67 3.89<br>2.75 2.51                                            |  | g3144 g3145                      | RNase P, subunit Pop3; RNA polymerase, alpha subunit; RNA polymerase II, heptapeptide repeat, eukaryotic; RNA polymerase, N-terminal; RNA polymerase Rpb1, domain 4; RNA polymerase Rpb1, domain 5; RNA polymerase Rpb1, domain 6; RNA polymerase Rpb1, domain 7; RNA polymerase Rpb1, domain 1; RNA polymerase Rpb1, domain 3                                                                                                                                                                                                                                                                                                                                                                                                                                            |  |  |  |
| DUP20 | scaffold2 size2959145 | 2,001,000 | 2,003,800 | 2,800  | 11 | BP57 CP367 CP61 MCO448 PL429.300<br>PL429.5000 PL429.600 PL429.miseq<br>PL448 SZMC21154 SZMC8029<br>SZMC8092 SZMC8094 SZMC8095 | 4.15 4.00 4.13 4.76 3.12<br>1.32 3.56 2.51 7.65 3.93<br>5.02 4.59 2.73 4.57      |  | .                                |                                                                                                                                                                                                                                                                                                                                                                                                                                                                                                                                                                                                                                                                                                                                                                           |  |  |  |
| DUP21 | scaffold2 size2959145 | 2,004,000 | 2,015,400 | 11,400 | 4  | MCO448 PL448 SZMC8094 SZMC8095                                                                                                 | 3.41 4.61 2.73 2.64                                                              |  | g4040 g4041 g4042<br>g4043 g4044 | Leucine rich repeat 4; Major facilitator superfamily domain, general substrate transporter; Major facilitator superfamily; Major facilitator superfamily domain; Leucine-rich repeat; Leucine rich repeat 4; ATPase, P-type, K/Mg/Cd/Cu/Zn/Na/Ca/Na/H-transporter; ATPase, P-type, cytoplasmic domain N; ATPase, P-type cation-transporter, N-terminal; ATPase, P-type, cytoplasmic transduction domain A; ATPase, P-type phosphorylation site; ATPase, P-type, ATPase-associated domain; Haloacid dehalogenase-like hydrolase; ATPase, P-type, H+ transporting proton pump; ATPase, P-type cation-transporter, C-terminal; HAD-like domain; ATPase, cation-transporting, domain N; ATPase, P-type, potassium/sodium efflux, fungal; ATPase, P-type, transmembrane domain |  |  |  |
| DUP22 | scaffold2 size2959145 | 2,015,900 | 2,024,700 | 8,800  | 3  | MCO448 PL429.5000 PL448                                                                                                        | 2.71 2.50 3.99                                                                   |  | g4045 g4046 g4047<br>g4048 g4049 | Domain of unknown function DUF3818, PX-associated; PX-associated domain; Phox homologous domain; GTP binding domain; Nucleolar GTP-binding protein 2; Nucleolar GTP-binding protein 2, N-terminal domain; GTP-binding protein, orthogonal bundle domain; Ribonuclease H-like domain; Ribonuclease CAF1; Protein of unknown function DUF284, transmembrane eukaryotic; EF-Hand 1, calcium-binding site; EF-hand-like domain; Calponin homology domain; EF-HAND 2; Actinin-type, actin-binding, conserved site                                                                                                                                                                                                                                                              |  |  |  |
| DUP23 | scaffold2 size2959145 | 2,038,500 | 2,046,200 | 7,700  | 3  | MCO448 PL429.5000 PL448                                                                                                        | 2.81 2.56 3.72                                                                   |  | g4055 g4056 g4057<br>g4058 g4059 | Leucine-rich repeat; Leucine-rich repeat, typical subtype; Leucine rich repeat 4; Aldolase-type TIM barrel; Cystathionine beta-synthase, core; WD40-repeat-containing domain; WD40/YVTN repeat-like-containing domain; WD40-repeat-containing domain; WD40 repeat, conserved site; NAD(P)-binding domain; Short-chain dehydrogenase/reductase, conserved site; Glucose/ribitol dehydrogenase; Short-chain dehydrogenase/reductase SDR                                                                                                                                                                                                                                                                                                                                     |  |  |  |
| DUP24 | scaffold2 size2959145 | 2,052,400 | 2,057,100 | 4,700  | 3  | MCO448 PL448 SZMC8094                                                                                                          | 2.63 3.70 2.56                                                                   |  | g4062 g4063 g4064                | Craniofacial development protein 1/Bucentaur; Leucine-rich repeat; Dipeptidyl-peptidase 3                                                                                                                                                                                                                                                                                                                                                                                                                                                                                                                                                                                                                                                                                 |  |  |  |
| DUP25 | scaffold2 size2959145 | 2,057,400 | 2,059,100 | 1,700  | 4  | MCO448 PL429.5000 PL448 SZMC8094                                                                                               | 2.65 2.60 3.52 2.63                                                              |  | g4064 g4065                      | Dipeptidyl-peptidase 3; ABC transporter, transmembrane domain; ABC transporter-like; ABC transporter, conserved site; ABC transporter, integral membrane type 1; ABC transporter, transmembrane domain, type 1; AAA+ ATPase domain                                                                                                                                                                                                                                                                                                                                                                                                                                                                                                                                        |  |  |  |
| DUP26 | scaffold2 size2959145 | 2,059,400 | 2,060,800 | 1,400  | 5  | MCO448 PL429.5000 PL429.miseq<br>PL448 SZMC8094 SZMC8095                                                                       | 2.98 2.69 2.64 3.92 2.81<br>2.54                                                 |  | g4065                            | ABC transporter, transmembrane domain; ABC transporter-like; ABC transporter, conserved site; ABC transporter, integral membrane type 1; ABC transporter, transmembrane domain, type 1; AAA+ ATPase domain                                                                                                                                                                                                                                                                                                                                                                                                                                                                                                                                                                |  |  |  |
| DUP27 | scaffold2 size2959145 | 2,061,800 | 2,063,700 | 1,900  | 2  | PL448 SZMC8094                                                                                                                 | 3.71 2.78                                                                        |  | g4066                            | DNA polymerase V; Armadillo-type fold; ATPase, F1 complex, epsilon subunit, mitochondrial                                                                                                                                                                                                                                                                                                                                                                                                                                                                                                                                                                                                                                                                                 |  |  |  |
| DUP28 | scaffold2 size2959145 | 2,064,000 | 2,065,500 | 1,500  | 5  | CP367 MCO448 PL429.miseq PL448<br>SZMC8094                                                                                     | 2.52 2.78 2.61 3.84 2.77                                                         |  | g4066 g4067                      | DNA polymerase V; Armadillo-type fold; ATPase, F1 complex, epsilon subunit, mitochondrial; WD40/YVTN repeat-like-containing domain; WD40 repeat; WD40-repeat-containing domain                                                                                                                                                                                                                                                                                                                                                                                                                                                                                                                                                                                            |  |  |  |
| DUP29 | scaffold2 size2959145 | 2,075,100 | 2,078,600 | 3,500  | 3  | MCO448 PL429.5000 PL448                                                                                                        | 2.81 2.68 3.82                                                                   |  | g4072 g4073 g4074                | NAD(P)-binding domain; Short-chain dehydrogenase/reductase, conserved site; Short-chain dehydrogenase/reductase SDR; Glucose/ribitol dehydrogenase; Ribonuclease H-like domain; Ribosomal protein L9/RNase H1, N-terminal; Ribonuclease H domain; Ribonuclease H1, eukaryote; Ribonuclease H1, N-terminal                                                                                                                                                                                                                                                                                                                                                                                                                                                                 |  |  |  |
| DUP30 | scaffold2 size2959145 | 2,078,900 | 2,080,900 | 2,000  | 11 | BP57 CP367 CP61 MCO448 PL429.300<br>PL429.5000 PL429.600 PL429.miseq<br>PL448 SZMC21154 SZMC8029<br>SZMC8092 SZMC8094 SZMC8095 | 4.90 3.54 5.08 5.78 5.89<br>7.75 6.45 5.82 5.42 6.90<br>5.91 6.56 4.31 7.24      |  | g4075                            | DDE superfamily endonuclease, CENP-B-like                                                                                                                                                                                                                                                                                                                                                                                                                                                                                                                                                                                                                                                                                                                                 |  |  |  |
| DUP31 | scaffold2 size2959145 | 2,272,300 | 2,273,400 | 1,100  | 3  | MCO448 PL429.5000 PL448                                                                                                        | 2.71 2.60 3.58                                                                   |  | g4139                            | Major sperm protein; PapD-like; Vesicle-associated membrane protein                                                                                                                                                                                                                                                                                                                                                                                                                                                                                                                                                                                                                                                                                                       |  |  |  |
| DUP32 | scaffold2 size2959145 | 2,278,200 | 2,279,300 | 1,100  | 6  | CP367 MCO448 PL429.5000<br>PL429.miseq PL448 SZMC8094<br>SZMC8095                                                              | 2.56 3.10 3.10 2.92 4.05<br>2.54 2.68                                            |  | g4141                            | Amino acid transporter, transmembrane                                                                                                                                                                                                                                                                                                                                                                                                                                                                                                                                                                                                                                                                                                                                     |  |  |  |
| DUP33 | scaffold2 size2959145 | 2,309,300 | 2,310,600 | 1,300  | 4  | MCO448 PL429.miseq PL448 SZMC8095                                                                                              | 2.72 2.90 3.61 2.56                                                              |  | g4153                            | Arrestin-like, N-terminal; Immunoglobulin E-set; Arrestin C-terminal-like domain                                                                                                                                                                                                                                                                                                                                                                                                                                                                                                                                                                                                                                                                                          |  |  |  |
| DUP34 | scaffold2 size2959145 | 2,332,400 | 2,333,800 | 1,400  | 11 | BP57 CP367 CP61 MCO448 PL429.300<br>PL429.5000 PL429.600 PL429.miseq<br>PL448 SZMC21154 SZMC8029<br>SZMC8092 SZMC8094 SZMC8095 | 8.77 10.92 6.15 7.15<br>3.85 4.44 4.20 7.74<br>11.56 4.58 5.34 5.25<br>7.47 6.07 |  | g4164                            | Adhesion domain, bacterial; Agglutinin-like protein, N-terminal                                                                                                                                                                                                                                                                                                                                                                                                                                                                                                                                                                                                                                                                                                           |  |  |  |
| DUP35 | scaffold2 size2959145 | 2,457,900 | 2,460,200 | 2,300  | 6  | MCO448 PL429.miseq PL448 SZMC8092<br>SZMC8094 SZMC8095                                                                         | 3.35 2.62 4.52 2.51 2.66<br>2.95                                                 |  | g4228 g4229 g4230                | Glycine cleavage T-protein, N-terminal; Glycine cleavage T-protein, C-terminal barrel; Glycine cleavage system T protein; PIK-related kinase, FATC; Telomere-length maintenance and DNA damage repair; PIK-related kinase; ATM/Tel1; Phosphatidylinositol 3-/4-kinase, catalytic domain; Protein kinase-like domain; Phosphatidylinositol 3/4-kinase, conserved site                                                                                                                                                                                                                                                                                                                                                                                                      |  |  |  |
| DUP36 | scaffold2 size2959145 | 2,493,100 | 2,494,700 | 1,600  | 3  | MCO448 PL429.5000 PL429.miseq<br>PL448                                                                                         | 3.01 2.82 2.63 3.81                                                              |  | g4234 g4235                      | Major facilitator superfamily domain, general substrate transporter; Major facilitator superfamily                                                                                                                                                                                                                                                                                                                                                                                                                                                                                                                                                                                                                                                                        |  |  |  |

|       |                                                                                                                                                                                                                                                                                                                                                                                                                                                                                                                                                                                                                                |
|-------|--------------------------------------------------------------------------------------------------------------------------------------------------------------------------------------------------------------------------------------------------------------------------------------------------------------------------------------------------------------------------------------------------------------------------------------------------------------------------------------------------------------------------------------------------------------------------------------------------------------------------------|
| DUP37 | scaffold2 size2959145 2,500,200 2,502,100 1,900 2 CP367 PL448 2.55 3.72 g4238 g4239 g4240 Ubiquinol-cytochrome c chaperone/UPF0174; Acyl-CoA N-acyltransferase; SKI-interacting protein SKIP, SNW domain; SKI-interacting protein, SKIP                                                                                                                                                                                                                                                                                                                                                                                        |
| DUP38 | scaffold2 size2959145 2,542,800 2,543,900 1,100 3 CP367 PL429.miseq PL448 2.94 2.58 3.65 g4258 g4259 WD40/YVTN repeat-like-containing domain; WD40 repeat, conserved site; G-protein beta WD-40 repeat; WD40-repeat-containing domain; WD40 repeat; Protein kinase-like domain; Protein kinase, ATP binding site; Protein kinase, catalytic domain; Serine/threonine- / dual-specificity protein kinase, catalytic domain                                                                                                                                                                                                      |
| DUP39 | scaffold2 size2959145 2,556,600 2,558,800 2,200 3 MCO448 PL429.5000 PL429.miseq PL448 2.76 2.64 2.62 4.01 g4263 Zinc finger, LIM-type                                                                                                                                                                                                                                                                                                                                                                                                                                                                                          |
| DUP40 | scaffold2 size2959145 2,566,900 2,569,400 2,500 4 MCO448 PL429.5000 PL448 SZMC8095 2.96 2.51 3.57 2.56 g4267 g4268 g4269 YL1 nuclear; YL1 nuclear, C-terminal; Ubiquinone biosynthesis O-methyltransferase; Snf7                                                                                                                                                                                                                                                                                                                                                                                                               |
| DUP41 | scaffold2 size2959145 2,641,300 2,642,500 1,200 4 CP367 MCO448 PL429.300 PL429.5000 PL429.600 PL429.miseq PL448 2.71 2.76 2.53 2.80 2.50 2.72 3.84 g4299 Protein kinase, ATP binding site; Protein kinase-like domain; Serine/threonine-protein kinase, active site; Protein kinase, catalytic domain; Serine/threonine- / dual-specificity protein kinase, catalytic domain                                                                                                                                                                                                                                                   |
| DUP42 | scaffold2 size2959145 2,650,300 2,651,400 1,100 4 MCO448 PL429.5000 PL429.miseq PL448 SZMC8095 3.19 2.60 2.88 3.72 2.57 g4301 Lipase, class 3                                                                                                                                                                                                                                                                                                                                                                                                                                                                                  |
| DUP43 | scaffold2 size2959145 2,687,700 2,689,000 1,300 4 MCO448 PL429.5000 PL429.miseq PL448 SZMC8095 2.87 2.56 2.89 3.51 2.60 g4316 Major facilitator superfamily domain, general substrate transporter; Major facilitator superfamily; Major facilitator superfamily domain                                                                                                                                                                                                                                                                                                                                                         |
| DUP44 | scaffold2 size2959145 2,751,600 2,752,800 1,200 1 PL448 3.28 g4350 DNA topoisomerase I, domain 1; Topoisomerase I C-terminal domain; DNA breaking-rejoining enzyme, catalytic core; DNA topoisomerase I, catalytic core, alpha/beta subdomain, eukaryotic-type; DNA topoisomerase I, catalytic core, alpha-helical subdomain, eukaryotic-type; DNA topoisomerase I, catalytic core, eukaryotic-type; DNA topoisomerase I, active site; DNA topoisomerase I, DNA binding, eukaryotic-type; DNA topoisomerase I, DNA binding, mixed alpha/beta motif, eukaryotic-type; DNA topoisomerase I; DNA topoisomerase I, eukaryotic-type |
| DUP45 | scaffold2 size2959145 2,766,000 2,767,700 1,700 2 MCO448 PL448 2.54 3.80 g4354 Zinc finger C2H2-type/integrase DNA-binding domain                                                                                                                                                                                                                                                                                                                                                                                                                                                                                              |
| DUP46 | scaffold2 size2959145 2,770,000 2,775,200 5,200 2 MCO448 PL448 2.92 3.52 g4355 g4356 g4357 Zinc finger C2H2-type/integrase DNA-binding domain; GRAM                                                                                                                                                                                                                                                                                                                                                                                                                                                                            |
| DUP47 | scaffold2 size2959145 2,790,600 2,791,900 1,300 3 MCO448 PL448 SZMC8094 2.75 3.37 2.61 g4367 Ribosomal protein L1; Ribosomal protein L1, 3-layer alpha/beta-sandwich; Ribosomal protein L1, superfamily                                                                                                                                                                                                                                                                                                                                                                                                                        |
| DUP48 | scaffold2 size2959145 2,821,600 2,825,700 4,100 3 MCO448 PL429.5000 PL448 2.90 2.53 3.58 g4383 g4384 g4385 g4386 Glycolipid transfer protein domain; Complex 1 LYR protein; ACN9                                                                                                                                                                                                                                                                                                                                                                                                                                               |
| DUP49 | scaffold2 size2959145 2,826,600 2,827,800 1,200 6 BP57 CP61 MCO448 PL429.5000 PL448 SZMC21154 1.34 1.36 3.03 2.71 3.99 1.12 g4387                                                                                                                                                                                                                                                                                                                                                                                                                                                                                              |
| DUP50 | scaffold2 size2959145 2,833,300 2,835,500 2,200 4 MCO448 PL429.5000 PL448 SZMC8094 2.87 2.64 3.68 2.58 g4389 Zinc finger, RING-type; Zinc finger, RING/FYVE/PHD-type                                                                                                                                                                                                                                                                                                                                                                                                                                                           |
| DUP51 | scaffold2 size2959145 2,836,500 2,838,100 1,600 2 MCO448 PL448 2.58 3.69 g4390 Helix-loop-helix domain                                                                                                                                                                                                                                                                                                                                                                                                                                                                                                                         |
| DUP52 | scaffold2 size2959145 2,844,600 2,845,800 1,200 4 MCO448 PL429.5000 PL448 SZMC8094 2.65 2.71 4.13 2.57 g4391                                                                                                                                                                                                                                                                                                                                                                                                                                                                                                                   |
| DUP53 | scaffold2 size2959145 2,849,400 2,851,000 1,600 4 MCO448 PL429.5000 PL448 SZMC8094 2.50 2.65 3.58 2.62 g4392 V-type proton ATPase subunit a; ATPase, V0/A0 complex subunit a                                                                                                                                                                                                                                                                                                                                                                                                                                                   |
| DUP54 | scaffold2 size2959145 2,851,500 2,853,300 1,800 4 MCO448 PL448 SZMC8094 SZMC8095 2.85 3.69 2.66 2.53 g4393 g4392 Tetratricopeptide-like helical; Sel1-like; V-type proton ATPase subunit a; ATPase, V0/A0 complex subunit a                                                                                                                                                                                                                                                                                                                                                                                                    |
| DUP55 | scaffold2 size2959145 2,853,900 2,855,700 1,800 5 MCO448 PL429.5000 PL429.miseq PL448 SZMC8094 SZMC8095 3.05 2.51 2.52 3.67 2.65 2.58 g4393 g4394 Tetratricopeptide-like helical; Sel1-like; Dna2/Cas4, domain of unknown function DUF83; Dna2; DNA replication factor Dna2, N-terminal                                                                                                                                                                                                                                                                                                                                        |
| DUP56 | scaffold2 size2959145 2,856,000 2,857,800 1,800 6 CP367 MCO448 PL429.5000 PL429.miseq PL448 SZMC8094 SZMC8095 2.55 2.96 2.54 2.60 3.81 2.73 2.56 g4394 Dna2/Cas4, domain of unknown function DUF83; Dna2; DNA replication factor Dna2, N-terminal                                                                                                                                                                                                                                                                                                                                                                              |
| DUP57 | scaffold2 size2959145 2,870,600 2,871,800 1,200 4 MCO448 PL429.5000 PL448 SZMC8094 2.95 2.65 4.09 2.62 g4399 Amino acid permease, conserved site; Amino acid permease domain; Amino acid/polyamine transporter I; Amino acid permease, fungi                                                                                                                                                                                                                                                                                                                                                                                   |
| DUP58 | scaffold2 size2959145 2,874,900 2,878,100 3,200 5 MCO448 PL429.5000 PL429.miseq PL448 SZMC8094 SZMC8095 3.06 2.56 2.51 3.82 2.56 2.51 g4402 WD40/YVTN repeat-like-containing domain; WD40-repeat-containing domain; Soluble quinoprotein glucose/sorbose dehydrogenase; WD40 repeat, conserved site; WD40 repeat                                                                                                                                                                                                                                                                                                               |
| DUP59 | scaffold2 size2959145 2,880,400 2,882,700 2,300 4 MCO448 PL429.5000 PL429.miseq PL448 SZMC8094 2.62 2.51 2.51 3.94 2.53 g4405 Multicopper oxidase, copper-binding site; Multicopper oxidase, type 2; Multicopper oxidase, type 3; Multicopper oxidase, type 1; Cupredoxin                                                                                                                                                                                                                                                                                                                                                      |
| DUP60 | scaffold2 size2959145 2,895,300 2,897,900 2,600 3 MCO448 PL448 SZMC8094 2.71 3.47 2.51 g4409 g4410 Ubiquitin activating enzyme, alpha domain; Ubiquitin-activating enzyme repeat; E2 binding; Molybdenum cofactor biosynthesis, MoeB; UBA/THIF-type NAD/FAD binding fold; NAD(P)-binding domain; Ubiquitin-activating enzyme, E1, active site; Ubiquitin-activating enzyme                                                                                                                                                                                                                                                     |
| DUP61 | scaffold2 size2959145 2,898,200 2,902,200 4,000 5 MCO448 PL429.5000 PL448 SZMC8094 SZMC8095 3.01 2.50 3.93 2.56 2.51 g4412 g4411 Restriction endonuclease type II-like; ERCC4 domain; Winged helix-turn-helix transcription repressor DNA-binding; DNA repair nuclease, XPF-type/Helicase; Like-Sm (LSM) domain; Rad52/22 double-strand break repair protein; Ribonucleoprotein LSM domain, eukaryotic/archaea-type; Ribonucleoprotein LSM domain                                                                                                                                                                              |
| DUP62 | scaffold2 size2959145 2,903,800 2,907,800 4,000 2 MCO448 PL448 2.56 3.79 g4414 g4415 g4416 Nucleoporin protein Ndc1-Nup; Cation/H+ exchanger, CPA1 family; Na+/H+ exchanger; Cation/H+ exchanger, CPA1 family; Cation/H+ exchanger                                                                                                                                                                                                                                                                                                                                                                                             |
| DUP63 | scaffold2 size2959145 2,908,200 2,909,500 1,300 2 PL429.5000 PL448 2.53 3.72 g4417 Domain of unknown function DUF250                                                                                                                                                                                                                                                                                                                                                                                                                                                                                                           |
| DUP64 | scaffold2 size2959145 2,911,700 2,913,300 1,600 4 MCO448 PL429.5000 PL448 SZMC8094 2.92 2.55 4.05 2.52 g4419 Target SNARE coiled-coil domain                                                                                                                                                                                                                                                                                                                                                                                                                                                                                   |

|       |                       |           |           |        |    |                                                                                                                       |                                                                                     |  |                                                                               |                                                                                                                                                                                                                                                                                                                                                                                                                                                                                                                                                                                                                                                                                                                                                                                                                                                                                                                                      |  |  |   |
|-------|-----------------------|-----------|-----------|--------|----|-----------------------------------------------------------------------------------------------------------------------|-------------------------------------------------------------------------------------|--|-------------------------------------------------------------------------------|--------------------------------------------------------------------------------------------------------------------------------------------------------------------------------------------------------------------------------------------------------------------------------------------------------------------------------------------------------------------------------------------------------------------------------------------------------------------------------------------------------------------------------------------------------------------------------------------------------------------------------------------------------------------------------------------------------------------------------------------------------------------------------------------------------------------------------------------------------------------------------------------------------------------------------------|--|--|---|
| DUP65 | scaffold2 size2959145 | 2,915,900 | 2,936,400 | 20,500 | 8  | BP57 CP367 CP61 MCO448 PL429.300 PL429.5000 PL429.600 PL448 SZMC8094 SZMC8095                                         | 2.75 2.53 2.76 3.24 2.57 2.79 2.67 4.26 2.91 2.73                                   |  | g4421 g4422 g4423 g4424 g4425 g4426 g4427 g4428 g4429 g4430 g4431 g4420 g4432 | 3-oxo-5-alpha-steroid 4-dehydrogenase, C-terminal; Isoprenylcysteine carboxyl methyltransferase; Protein-S-isoprenylcysteine O-methyltransferase; Isoprenylcysteine carboxyl methyltransferase; Protein-S-isoprenylcysteine O-methyltransferase; ARP2/3 complex, p21-Arc subunit; WD40/YVTN repeat-like-containing domain; WD40 repeat, conserved site; WD40-repeat-containing domain; WD40 repeat; Calcipressin; Leucine-rich repeat; Leucine rich repeat 4; Glutathione-dependent formaldehyde-activating enzyme/centromere protein V; Fumarylacetoacetase, C-terminal-related; Fumarylacetoacetase, C-terminal; RmlC-like cupin domain; RmlC-like jelly roll fold; Cupin 2, conserved barrel; Major facilitator superfamily domain, general substrate transporter; Major facilitator superfamily; Major facilitator superfamily domain; Fatty acid desaturase, type 1; Monooxygenase, FAD-binding; Aromatic-ring hydroxylase-like |  |  |   |
| DUP66 | scaffold3 size1388033 | 269,300   | 271,800   | 2,500  | 8  | BP57 CP61 MCO448 PL429.300 PL429.5000 PL429.600 PL429.miseq PL448 SZMC8029 SZMC8092 SZMC8095                          | 3.03 3.07 3.66 2.85 3.52 2.87 3.73 2.89 3.20 3.27 3.71                              |  | g1661 g1662                                                                   | Lipase, secreted; Lipase, secreted                                                                                                                                                                                                                                                                                                                                                                                                                                                                                                                                                                                                                                                                                                                                                                                                                                                                                                   |  |  |   |
| DUP67 | scaffold3 size1388033 | 317,800   | 319,500   | 1,700  | 9  | BP57 CP61 MCO448 PL429.300 PL429.5000 PL429.600 PL429.miseq PL448 SZMC21154 SZMC8029 SZMC8092 SZMC8095                | 3.51 2.82 3.42 3.30 3.22 3.18 3.99 2.91 3.46 3.99 3.81 3.96                         |  | g1683                                                                         | Major facilitator superfamily domain, general substrate transporter                                                                                                                                                                                                                                                                                                                                                                                                                                                                                                                                                                                                                                                                                                                                                                                                                                                                  |  |  |   |
| DUP68 | scaffold3 size1388033 | 373,000   | 375,000   | 2,000  | 6  | MCO448 PL429.5000 PL448 SZMC8029 SZMC8092 SZMC8095                                                                    | 3.45 2.74 2.97 2.65 2.81 3.01                                                       |  | g1708 g1709                                                                   |                                                                                                                                                                                                                                                                                                                                                                                                                                                                                                                                                                                                                                                                                                                                                                                                                                                                                                                                      |  |  |   |
| DUP69 | scaffold3 size1388033 | 486,100   | 488,500   | 2,400  | 10 | BP57 CP367 CP61 MCO448 PL429.300 PL429.5000 PL429.600 PL429.miseq PL448 SZMC21154 SZMC8029 SZMC8092 SZMC8094 SZMC8095 | 3.08 3.07 3.74 3.60 3.54 3.77 4.19 3.17 3.61 3.17 3.18 3.23 3.50                    |  | g1753                                                                         | PT repeat                                                                                                                                                                                                                                                                                                                                                                                                                                                                                                                                                                                                                                                                                                                                                                                                                                                                                                                            |  |  |   |
| DUP70 | scaffold3 size1388033 | 543,100   | 544,300   | 1,200  | 10 | CP367 CP61 MCO448 PL429.300 PL429.5000 PL429.600 PL429.miseq PL448 SZMC21154 SZMC8029 SZMC8092 SZMC8094 SZMC8095      | 3.04 3.71 3.90 2.88 3.28 3.01 3.59 3.10 2.97 3.24 3.23 3.34 3.79                    |  | g1774                                                                         |                                                                                                                                                                                                                                                                                                                                                                                                                                                                                                                                                                                                                                                                                                                                                                                                                                                                                                                                      |  |  |   |
| DUP71 | scaffold3 size1388033 | 1,119,400 | 1,120,700 | 1,300  | 7  | BP57 MCO448 PL429.300 PL429.5000 PL429.600 PL429.miseq PL448 SZMC8029 SZMC8092 SZMC8095                               | 2.58 3.79 2.61 2.88 2.52 3.38 2.93 2.65 2.74 3.30                                   |  | g2036                                                                         | RNA polymerase II-associated, Paf1                                                                                                                                                                                                                                                                                                                                                                                                                                                                                                                                                                                                                                                                                                                                                                                                                                                                                                   |  |  |   |
| DUP72 | scaffold3 size1388033 | 1,270,300 | 1,271,900 | 1,600  | 11 | BP57 CP367 CP61 MCO448 PL429.300 PL429.5000 PL429.600 PL429.miseq PL448 SZMC21154 SZMC8029 SZMC8092 SZMC8094 SZMC8095 | 2.97 4.18 3.81 4.29 3.45 4.01 3.26 4.13 3.82 3.44 3.63 3.81 5.43 4.37               |  | g2107                                                                         | Major facilitator superfamily domain, general substrate transporter; Major facilitator superfamily                                                                                                                                                                                                                                                                                                                                                                                                                                                                                                                                                                                                                                                                                                                                                                                                                                   |  |  |   |
| DUP73 | scaffold3 size1388033 | 1,363,800 | 1,370,900 | 7,100  | 8  | BP57 CP61 MCO448 PL448 SZMC21154 SZMC8029 SZMC8092 SZMC8094                                                           | 2.96 3.41 3.96 3.77 3.12 2.52 2.75 2.90                                             |  | g2149 g2150 g2151 g2152 g2153                                                 | Leucine-rich repeat; Mss4-like; Glutathione-dependent formaldehyde-activating enzyme/centromere protein V; Fumarylacetoacetase, C-terminal-related; Fumarylacetoacetase, C-terminal; RmlC-like cupin domain; RmlC-like jelly roll fold; Cupin 2, conserved barrel; Major facilitator superfamily domain, general substrate transporter; Major facilitator superfamily; Major facilitator superfamily domain                                                                                                                                                                                                                                                                                                                                                                                                                                                                                                                          |  |  |   |
| DUP74 | scaffold4 size908642  | 877,600   | 879,000   | 1,400  | 6  | CP367 MCO448 PL429.5000 PL429.miseq PL448 SZMC8094 SZMC8095                                                           | 2.72 3.40 2.76 2.69 3.27 2.74 2.61                                                  |  | g716                                                                          | ATPase, dynein-related, AAA domain; Midasin; AAA+ ATPase domain; von Willebrand factor, type A; Sigma-54 interaction domain, ATP-binding site 1                                                                                                                                                                                                                                                                                                                                                                                                                                                                                                                                                                                                                                                                                                                                                                                      |  |  |   |
| DUP75 | scaffold4 size908642  | 891,900   | 897,900   | 6,000  | 8  | BP57 MCO448 PL429.300 PL429.5000 PL429.600 PL429.miseq PL448 SZMC21154 SZMC8029 SZMC8092 SZMC8095                     | 3.04 4.49 3.20 3.16 3.28 3.45 5.56 2.74 2.99 3.07 3.48                              |  | g722 g723 g724 g725                                                           | Fumarylacetoacetase, C-terminal-related; Fumarylacetoacetase, C-terminal; RmlC-like cupin domain; RmlC-like jelly roll fold; Cupin 2, conserved barrel; Major facilitator superfamily domain, general substrate transporter; Major facilitator superfamily; Major facilitator superfamily domain; Monooxygenase, FAD-binding; Aromatic-ring hydroxylase-like                                                                                                                                                                                                                                                                                                                                                                                                                                                                                                                                                                         |  |  |   |
| DUP76 | scaffold4 size908642  | 898,500   | 900,100   | 1,600  | 7  | BP57 CP61 MCO448 PL429.5000 PL448 SZMC8094 SZMC8095                                                                   | 2.70 4.04 3.77 1.45 4.30 3.20 2.84                                                  |  | g726                                                                          |                                                                                                                                                                                                                                                                                                                                                                                                                                                                                                                                                                                                                                                                                                                                                                                                                                                                                                                                      |  |  |   |
| DUP77 | scaffold5 size1063617 | 718,562   | 729,498   | 10,936 | 11 | BP57 CP367 CP61 MCO448 PL429.300 PL429.5000 PL429.600 PL429.miseq PL448 SZMC21154 SZMC8029 SZMC8092 SZMC8094 SZMC8095 | 36.18 36.32 38.33 43.87 31.00 50.73 29.39 49.07 34.75 45.36 39.00 38.93 36.79 41.53 |  | g1386 g1387                                                                   | CheY-like superfamily; Signal transduction response regulator, receiver domain                                                                                                                                                                                                                                                                                                                                                                                                                                                                                                                                                                                                                                                                                                                                                                                                                                                       |  |  |   |
| DUP78 | scaffold6 size820601  | 269,300   | 270,600   | 1,300  | 9  | BP57 CP61 MCO448 PL429.300 PL429.5000 PL429.600 PL429.miseq PL448 SZMC21154 SZMC8029 SZMC8092 SZMC8095                | 3.07 3.07 4.00 2.85 2.99 2.84 4.20 3.04 2.79 2.98 3.17 3.58                         |  | g854                                                                          | Short-chain dehydrogenase/reductase, conserved site; Glucose/ribitol dehydrogenase; Short-chain dehydrogenase/reductase SDR; NAD(P)-binding domain; MaoC-like dehydratase; Polyketide synthase/Fatty acid synthase, KR                                                                                                                                                                                                                                                                                                                                                                                                                                                                                                                                                                                                                                                                                                               |  |  |   |
| DUP79 | scaffold6 size820601  | 323,373   | 336,324   | 12,951 | 2  | MCO448 PL448                                                                                                          | 2.66 3.30                                                                           |  | g872 g873 g875 g876 g877 g874                                                 | Immunoglobulin E-set; Vacuolar protein sorting-associated protein 26; HAD-superfamily phosphatase, subfamily IIIC; HAD-like domain; Magnesium-dependent phosphatase-1, eukaryotic type; Magnesium-dependent phosphatase-1, eukaryotic/arcaheal type; Zinc finger, ZZ-type; Ras guanine-nucleotide exchange factor, conserved site; Ras guanine nucleotide exchange factor, domain; Src homology-3 domain; Ras guanine nucleotide exchange factor; Ras-like guanine nucleotide exchange factor, N-terminal; Guanine-nucleotide dissociation stimulator CDC25                                                                                                                                                                                                                                                                                                                                                                          |  |  | x |
| DUP80 | scaffold6 size820601  | 538,800   | 545,100   | 6,300  | 6  | MCO448 PL429.300 PL429.5000 PL429.600 PL429.miseq SZMC21154 SZMC8029 SZMC8092 SZMC8095                                | 3.42 3.00 3.68 3.27 3.37 2.85 3.04 3.13 3.31                                        |  | g953 g954 g955 g956                                                           | Exo70 exocyst complex subunit; Cullin repeat-like-containing domain; tRNA ligase, phosphodiesterase, fungi; tRNA ligase, fungi; RNA ligase, T4 RnlA-like; tRNA ligase, kinase, fungi; Glutaredoxin; Thioredoxin-like fold; Glutaredoxin active site; Glutaredoxin subgroup; Glutaredoxin, eukaryotic/virial; Folliculin                                                                                                                                                                                                                                                                                                                                                                                                                                                                                                                                                                                                              |  |  |   |

|       |                       |           |           |        |    |                                                                                                                                |                                                                             |                                                                         |                                                                                                                                                                       |  |  |   |
|-------|-----------------------|-----------|-----------|--------|----|--------------------------------------------------------------------------------------------------------------------------------|-----------------------------------------------------------------------------|-------------------------------------------------------------------------|-----------------------------------------------------------------------------------------------------------------------------------------------------------------------|--|--|---|
| DUP81 | scaffold7 size2161850 | 72,600    | 73,892    | 1,292  | 6  | BP57 CP367 CP61 PL429.300<br>PL429.5000 PL429.600 PL429.miseq<br>SZMC21154 SZMC8092                                            | 4.16 2.78 4.08 4.69 4.61<br>4.71 3.44 3.62 3.04                             | .                                                                       |                                                                                                                                                                       |  |  |   |
| DUP82 | scaffold7 size2161850 | 156,738   | 158,628   | 1,890  | 8  | BP57 CP367 MCO448 PL429.300<br>SZMC8029 SZMC8092 SZMC8094<br>SZMC8095                                                          | 2.72 2.53 2.84 1.45 2.54<br>2.66 3.04 2.50                                  | g2225 g2226                                                             | Zinc finger, RING-type; Zinc finger, RING/FYVE/PHD-type; Zinc<br>finger, CCCH-type                                                                                    |  |  |   |
| DUP83 | scaffold7 size2161850 | 1,529,000 | 1,530,300 | 1,300  | 10 | CP367 CP61 MCO448 PL429.5000<br>PL429.miseq PL448 SZMC21154<br>SZMC8029 SZMC8092 SZMC8094<br>SZMC8095                          | 3.28 3.11 3.89 2.54 2.56<br>3.02 2.88 3.17 3.25 3.34<br>3.66                | g2874                                                                   | Enolase, C-terminal; Enolase, N-terminal; Enolase; Enolase,<br>conserved site                                                                                         |  |  |   |
| DUP84 | scaffold7 size2161850 | 1,747,200 | 1,756,800 | 9,600  | 6  | BP57 CP367 CP61 MCO448 PL429.5000<br>PL429.600 PL429.miseq PL448                                                               | 5.42 2.52 6.31 2.58 2.83<br>2.52 2.67 2.71                                  | g2959                                                                   | Globin; Riboflavin synthase-like beta-barrel; Globin, structural<br>domain; Globin-like                                                                               |  |  | x |
| DUP85 | scaffold7 size2161850 | 1,761,400 | 1,763,100 | 1,700  | 8  | BP57 CP367 CP61 PL429.300<br>PL429.5000 PL429.600 PL448<br>SZMC21154 SZMC8029 SZMC8092                                         | 3.92 3.98 3.55 2.79 2.99<br>3.59 4.18 2.81 2.92 3.29                        | g2963                                                                   |                                                                                                                                                                       |  |  |   |
| DUP86 | scaffold8 size317314  | 193,500   | 195,400   | 1,900  | 11 | BP57 CP367 CP61 MCO448 PL429.300<br>PL429.5000 PL429.600 PL429.miseq<br>PL448 SZMC21154 SZMC8029<br>SZMC8092 SZMC8094 SZMC8095 | 4.63 3.19 4.91 5.81 5.69<br>6.86 5.90 6.47 5.20 6.51<br>5.79 6.14 3.67 6.92 | g278                                                                    | DDE superfamily endonuclease, CENP-B-like                                                                                                                             |  |  |   |
| DUP87 | scaffold8 size317314  | 277,300   | 279,200   | 1,900  | 11 | BP57 CP367 CP61 MCO448 PL429.300<br>PL429.5000 PL429.600 PL429.miseq<br>PL448 SZMC21154 SZMC8029<br>SZMC8092 SZMC8094 SZMC8095 | 4.37 3.18 4.70 5.82 5.17<br>7.76 6.12 4.65 5.40 6.06<br>5.26 5.91 3.94 6.60 | g308                                                                    | DDE superfamily endonuclease, CENP-B-like                                                                                                                             |  |  |   |
| DEL1  | scaffold1 size3459122 | 113,330   | 119,716   | 6,386  | 7  | BP57 CP367 CP61 PL429.5000 PL448<br>SZMC21154 SZMC8094                                                                         | 0.78 1.33 1.48 1.36 1.42<br>1.47 1.11                                       | no g4475 g4476 g4477                                                    | Epoxide hydrolase-like                                                                                                                                                |  |  |   |
| DEL2  | scaffold1 size3459122 | 434,200   | 436,100   | 1,900  | 4  | BP57 CP367 CP61 PL429.300<br>PL429.5000 PL429.600 PL429.miseq                                                                  | 0.24 1.05 1.02 1.21 1.37<br>1.24 1.19                                       | no g4632                                                                |                                                                                                                                                                       |  |  |   |
| DEL3  | scaffold1 size3459122 | 824,955   | 827,915   | 2,960  | 11 | BP57 CP367 CP61 MCO448 PL429.300<br>PL429.5000 PL429.600 PL429.miseq<br>PL448 SZMC21154 SZMC8029<br>SZMC8092 SZMC8094 SZMC8095 | 1.43 1.29 1.38 1.22 1.23<br>1.44 1.33 1.39 1.17 1.22<br>1.34 1.33 1.32 1.31 | no g4805                                                                | ABC transporter-like; AAA+ ATPase domain; ABC transporter, N-<br>terminal; ABC transporter, transmembrane domain, type 1                                              |  |  |   |
| DEL4  | scaffold1 size3459122 | 985,207   | 988,069   | 2,862  | 9  | BP57 CP367 CP61 PL429.300<br>PL429.5000 PL429.600 SZMC21154<br>SZMC8029 SZMC8092 SZMC8094<br>SZMC8095                          | 1.26 1.37 1.32 1.27 1.43<br>1.34 1.17 1.28 1.33 1.37<br>1.49                | no g4867                                                                | Major facilitator superfamily domain, general substrate transporter;<br>Major facilitator superfamily                                                                 |  |  |   |
| DEL5  | scaffold1 size3459122 | 990,300   | 991,600   | 1,300  | 11 | BP57 CP367 CP61 MCO448 PL429.5000<br>PL429.600 PL429.miseq PL448<br>SZMC21154 SZMC8029 SZMC8092<br>SZMC8094 SZMC8095           | 0.91 0.44 0.64 0.14 0.83<br>0.94 0.43 0.21 0.98 0.93<br>0.53 0.50 0.59      | no .                                                                    |                                                                                                                                                                       |  |  |   |
| DEL6  | scaffold1 size3459122 | 996,386   | 1,007,717 | 11,331 | 9  | CP367 MCO448 PL429.miseq PL448<br>SZMC21154 SZMC8029 SZMC8092<br>SZMC8094 SZMC8095                                             | 1.32 1.23 1.41 1.43 1.41<br>1.47 1.43 1.08 1.27                             | no g4870 g4872 g4873<br>g4871                                           | GPR1/FUN34/yaaH; GPR1/FUN34/yaaH                                                                                                                                      |  |  |   |
| DEL7  | scaffold1 size3459122 | 1,716,100 | 1,717,300 | 1,200  | 6  | MCO448 PL429.300 PL429.600<br>PL429.miseq PL448 SZMC8092<br>SZMC8094 SZMC8095                                                  | 0.14 2.89 2.56 1.25 0.37<br>1.41 0.94 0.76                                  | no g5203                                                                |                                                                                                                                                                       |  |  |   |
| DEL8  | scaffold1 size3459122 | 1,729,086 | 1,743,062 | 13,976 | 11 | BP57 CP367 CP61 MCO448 PL429.300<br>PL429.5000 PL429.600 PL429.miseq<br>PL448 SZMC21154 SZMC8029<br>SZMC8092 SZMC8094 SZMC8095 | 1.12 1.17 1.04 1.22 1.10<br>1.25 1.04 1.02 1.09 0.96<br>1.04 1.08 0.96 1.07 | no g5207 g5208 g5209<br>g5210 g5211 g5212<br>g5214 g5215 g5216<br>g5213 | ATPase inhibitor, IATP, mitochondria; Spo11/DNA topoisomerase VI,<br>subunit A                                                                                        |  |  |   |
| DEL9  | scaffold1 size3459122 | 1,875,382 | 1,878,239 | 2,857  | 9  | BP57 CP367 MCO448 PL429.miseq<br>PL448 SZMC21154 SZMC8029<br>SZMC8094 SZMC8095                                                 | 1.46 1.41 0.99 1.45 1.23<br>1.33 1.48 1.19 1.15                             | no g5273 g5274 g5275                                                    | Glutaredoxin; Thioredoxin-like fold; Glutaredoxin active site;<br>Glutaredoxin subgroup; Glutaredoxin, eukaryotic/viral                                               |  |  |   |
| DEL10 | scaffold1 size3459122 | 1,889,249 | 1,890,676 | 1,427  | 11 | BP57 CP367 CP61 MCO448 PL429.300<br>PL429.5000 PL429.600 PL429.miseq<br>PL448 SZMC21154 SZMC8029<br>SZMC8092 SZMC8094 SZMC8095 | 1.15 1.03 1.15 1.30 1.00<br>1.29 1.05 1.22 1.05 1.10<br>1.22 1.07 1.17 1.12 | no g5282                                                                |                                                                                                                                                                       |  |  |   |
| DEL11 | scaffold1 size3459122 | 2,110,585 | 2,111,810 | 1,225  | 11 | BP57 CP367 CP61 MCO448 PL429.300<br>PL429.5000 PL429.600 PL429.miseq<br>PL448 SZMC21154 SZMC8029<br>SZMC8092 SZMC8094 SZMC8095 | 1.24 0.97 1.14 0.51 1.32<br>1.23 1.17 0.84 0.59 0.94<br>1.01 0.70 0.61 0.70 | no g5396                                                                | CinA, C-terminal                                                                                                                                                      |  |  |   |
| DEL12 | scaffold1 size3459122 | 2,781,300 | 2,789,500 | 8,200  | 7  | CP367 MCO448 PL448 SZMC21154<br>SZMC8029 SZMC8092 SZMC8095                                                                     | 2.70 0.22 0.20 1.03 1.17<br>0.11 1.32                                       | yes g5707 g5708                                                         | Hyphally-regulated cell wall protein, N-terminal; Hyphally-regulated<br>cell wall protein, N-terminal                                                                 |  |  |   |
| DEL13 | scaffold1 size3459122 | 2,883,492 | 2,890,688 | 7,196  | 11 | BP57 CP367 CP61 MCO448 PL429.300<br>PL429.5000 PL429.600 PL429.miseq<br>PL448 SZMC21154 SZMC8029<br>SZMC8092 SZMC8094 SZMC8095 | 1.15 1.08 1.11 0.87 1.08<br>1.26 1.11 0.99 0.92 1.02<br>1.11 1.08 0.92 0.86 | no g5741                                                                | ABC transporter-like; ABC transporter, conserved site; CDR ABC<br>transporter; AAA+ ATPase domain; ABC-2 type transporter;<br>Pleiotropic drug resistance protein PDR |  |  |   |

|       |                                |           |           |        |                                                                                                   |                                                                                                                       |                                                                             |                            |                                                                                                                                                                                                                                                                                                                                                                                                                                                                                                                                                                                                                                                                                                                                                                                                                                                                                                                                                                                      |                                                                                                                                                                                                                                                                                                      |  |   |   |
|-------|--------------------------------|-----------|-----------|--------|---------------------------------------------------------------------------------------------------|-----------------------------------------------------------------------------------------------------------------------|-----------------------------------------------------------------------------|----------------------------|--------------------------------------------------------------------------------------------------------------------------------------------------------------------------------------------------------------------------------------------------------------------------------------------------------------------------------------------------------------------------------------------------------------------------------------------------------------------------------------------------------------------------------------------------------------------------------------------------------------------------------------------------------------------------------------------------------------------------------------------------------------------------------------------------------------------------------------------------------------------------------------------------------------------------------------------------------------------------------------|------------------------------------------------------------------------------------------------------------------------------------------------------------------------------------------------------------------------------------------------------------------------------------------------------|--|---|---|
| DEL14 | scaffold1 size34591223,113,072 | 3,124,600 | 11,528    | 8      | BP57 MCO448 PL429.300 PL429.5000 PL429.600 PL429.miseq PL448 SZMC21154 SZMC8029 SZMC8092 SZMC8095 | 1.34 0.53 0.54 0.76 0.59<br>0.54 0.48 0.49 0.52 0.52<br>0.47                                                          | no                                                                          | g5831 g5832 g5833<br>g5834 | Acyl-CoA oxidase/dehydrogenase, central domain; Acyl-CoA oxidase; Acyl-CoA dehydrogenase/oxidase; Acyl-CoA oxidase/dehydrogenase, type 1; Acyl-CoA oxidase, C-terminal; Acyl-CoA dehydrogenase/oxidase, N-terminal; Acyl-CoA dehydrogenase/oxidase C-terminal; Acyl-CoA oxidase/dehydrogenase, central domain; Acyl-CoA oxidase; Acyl-CoA oxidase/dehydrogenase, type 1; Acyl-CoA oxidase, C-terminal; Acyl-CoA dehydrogenase/oxidase; Acyl-CoA dehydrogenase/oxidase, N-terminal; Acyl-CoA dehydrogenase/oxidase C-terminal; Acyl-CoA oxidase/dehydrogenase, central domain; Acyl-CoA oxidase; Acyl-CoA oxidase/dehydrogenase, type 1; Acyl-CoA oxidase, C-terminal; Acyl-CoA dehydrogenase/oxidase; Acyl-CoA dehydrogenase/oxidase, N-terminal; Acyl-CoA dehydrogenase/oxidase C-terminal; Acyl-CoA oxidase/dehydrogenase, central domain; Acyl-CoA oxidase; Acyl-CoA dehydrogenase/oxidase; Acyl-CoA dehydrogenase/oxidase, N-terminal; Acyl-CoA dehydrogenase/oxidase C-terminal |                                                                                                                                                                                                                                                                                                      |  | x |   |
| DEL15 | scaffold1 size34591223,288,261 | 3,289,501 | 1,240     | 11     | BP57 CP367 CP61 MCO448 PL429.600 PL448 SZMC21154 SZMC8029 SZMC8092 SZMC8094 SZMC8095              | 1.16 1.14 0.45 0.74 2.51<br>0.94 1.12 1.20 1.24 1.07<br>0.93                                                          | no                                                                          | g5913 g5914                |                                                                                                                                                                                                                                                                                                                                                                                                                                                                                                                                                                                                                                                                                                                                                                                                                                                                                                                                                                                      |                                                                                                                                                                                                                                                                                                      |  |   |   |
| DEL16 | scaffold2 size2959145          | 318,193   | 321,320   | 3,127  | 8                                                                                                 | CP367 MCO448 PL429.300 PL429.5000 PL429.600 PL429.miseq PL448 SZMC8029 SZMC8092 SZMC8094 SZMC8095                     | 1.34 0.13 1.15 0.88 0.92<br>1.02 0.43 1.22 1.18 0.68<br>0.41                | yes                        | .                                                                                                                                                                                                                                                                                                                                                                                                                                                                                                                                                                                                                                                                                                                                                                                                                                                                                                                                                                                    |                                                                                                                                                                                                                                                                                                      |  |   |   |
| DEL17 | scaffold2 size2959145          | 551,073   | 554,244   | 3,171  | 10                                                                                                | BP57 CP367 CP61 MCO448 PL429.300 PL429.5000 PL429.600 PL429.miseq PL448 SZMC8029 SZMC8092 SZMC8094 SZMC8095           | 1.28 1.22 1.27 1.36 1.25<br>1.46 1.32 1.30 1.15 1.33<br>1.31 1.32 1.39      | no                         | g3413                                                                                                                                                                                                                                                                                                                                                                                                                                                                                                                                                                                                                                                                                                                                                                                                                                                                                                                                                                                |                                                                                                                                                                                                                                                                                                      |  |   |   |
| DEL18 | scaffold2 size2959145          | 709,317   | 712,224   | 2,907  | 10                                                                                                | BP57 CP367 CP61 MCO448 PL429.300 PL429.5000 PL429.600 PL429.miseq PL448 SZMC8029 SZMC8092 SZMC8094 SZMC8095           | 0.91 1.49 1.38 1.06 0.82<br>0.71 0.79 0.86 1.34 1.47<br>1.44 1.15 1.14      | no                         | g3480                                                                                                                                                                                                                                                                                                                                                                                                                                                                                                                                                                                                                                                                                                                                                                                                                                                                                                                                                                                | Amino acid permease, conserved site; Amino acid permease domain; Amino acid/polyamine transporter I                                                                                                                                                                                                  |  |   |   |
| DEL19 | scaffold2 size2959145          | 868,587   | 870,482   | 1,895  | 11                                                                                                | BP57 CP367 CP61 MCO448 PL429.300 PL429.5000 PL429.600 PL429.miseq PL448 SZMC21154 SZMC8029 SZMC8092 SZMC8094 SZMC8095 | 1.09 1.02 1.02 1.01 1.12<br>1.27 1.12 1.17 0.87 0.96<br>1.09 1.14 1.01 1.04 | no                         | g3551                                                                                                                                                                                                                                                                                                                                                                                                                                                                                                                                                                                                                                                                                                                                                                                                                                                                                                                                                                                |                                                                                                                                                                                                                                                                                                      |  |   |   |
| DEL20 | scaffold2 size2959145          | 898,817   | 901,840   | 3,023  | 9                                                                                                 | BP57 CP367 CP61 PL429.300 PL429.600 PL429.miseq PL448 SZMC8029 SZMC8092 SZMC8094 SZMC8095                             | 1.20 1.23 1.24 1.23 1.20<br>1.23 1.31 1.18 1.23 1.30<br>1.46                | no                         | g3562 g3563                                                                                                                                                                                                                                                                                                                                                                                                                                                                                                                                                                                                                                                                                                                                                                                                                                                                                                                                                                          | Alcohol dehydrogenase, long-chain fatty; Glucose-methanol-choline oxidoreductase, N-terminal; Glucose-methanol-choline oxidoreductase, C-terminal; Alcohol dehydrogenase, long-chain fatty; Glucose-methanol-choline oxidoreductase, N-terminal; Glucose-methanol-choline oxidoreductase, C-terminal |  |   |   |
| DEL21 | scaffold2 size2959145          | 1,236,500 | 1,244,200 | 7,700  | 11                                                                                                | BP57 CP367 CP61 MCO448 PL429.300 PL429.5000 PL429.600 PL429.miseq PL448 SZMC21154 SZMC8029 SZMC8092 SZMC8094 SZMC8095 | 1.01 0.88 0.37 0.42 0.20<br>0.14 0.17 0.23 0.78 1.09<br>1.19 1.10 0.73 0.64 | yes                        | g3719 g3720                                                                                                                                                                                                                                                                                                                                                                                                                                                                                                                                                                                                                                                                                                                                                                                                                                                                                                                                                                          |                                                                                                                                                                                                                                                                                                      |  |   |   |
| DEL22 | scaffold2 size2959145          | 1,445,328 | 1,450,311 | 4,983  | 9                                                                                                 | BP57 CP61 MCO448 PL429.300 PL429.5000 PL429.600 PL429.miseq PL448 SZMC21154 SZMC8029 SZMC8092 SZMC8095                | 1.32 1.33 1.24 1.19 1.47<br>1.29 1.34 1.13 1.29 1.21<br>1.29 1.16           | no                         | g3802 g3803 g3804                                                                                                                                                                                                                                                                                                                                                                                                                                                                                                                                                                                                                                                                                                                                                                                                                                                                                                                                                                    | GPR1/FUN34/yaah; Oligopeptide transporter OPT superfamily; Tetrapeptide transporter, OPT1/isp4; Coatomer, epsilon subunit                                                                                                                                                                            |  |   |   |
| DEL23 | scaffold2 size2959145          | 1,498,800 | 1,509,000 | 10,200 | 4                                                                                                 | CP367 PL429.300 PL429.600 SZMC21154 SZMC8094                                                                          | 0.16 1.27 1.31 2.55 1.05                                                    | yes                        | g3822 g3823 g3824<br>g3825                                                                                                                                                                                                                                                                                                                                                                                                                                                                                                                                                                                                                                                                                                                                                                                                                                                                                                                                                           | Flocculin type 3 repeat; Flocculin type 3 repeat; Flocculin type 3 repeat; Cytadhesin P30P32; Flocculin type 3 repeat                                                                                                                                                                                |  |   | x |
| DEL24 | scaffold2 size2959145          | 1,675,200 | 1,678,100 | 2,900  | 7                                                                                                 | CP367 MCO448 PL429.miseq PL448 SZMC21154 SZMC8094 SZMC8095                                                            | 1.47 0.27 1.32 0.98 2.60<br>0.87 0.72                                       | no                         | g3901                                                                                                                                                                                                                                                                                                                                                                                                                                                                                                                                                                                                                                                                                                                                                                                                                                                                                                                                                                                | Glutamate/phenylalanine/leucine/valine dehydrogenase, dimerisation domain; Glutamate/phenylalanine/leucine/valine dehydrogenase; NAD(P)-binding domain; Glutamate/phenylalanine/leucine/valine dehydrogenase, C-terminal; Glutamate dehydrogenase                                                    |  |   |   |
| DEL25 | scaffold2 size2959145          | 1,791,300 | 1,795,700 | 4,400  | 11                                                                                                | BP57 CP367 CP61 MCO448 PL429.300 PL429.5000 PL429.600 PL429.miseq PL448 SZMC21154 SZMC8029 SZMC8092 SZMC8094 SZMC8095 | 0.50 1.28 1.13 0.08 1.24<br>1.35 1.28 1.28 0.09 0.32<br>1.21 1.20 1.12 1.09 | yes                        | g3952 g3953                                                                                                                                                                                                                                                                                                                                                                                                                                                                                                                                                                                                                                                                                                                                                                                                                                                                                                                                                                          | Microsomal signal peptidase 12kDa subunit                                                                                                                                                                                                                                                            |  |   |   |
| DEL26 | scaffold2 size2959145          | 1,810,131 | 1,814,400 | 4,269  | 8                                                                                                 | CP367 CP61 PL429.300 PL429.5000 PL429.600 PL429.miseq SZMC21154 SZMC8029 SZMC8092 SZMC8094 SZMC8095                   | 1.23 1.40 1.24 1.49 1.23<br>1.41 2.93 1.24 1.26 1.26<br>0.17                | yes                        | g3961 g3962                                                                                                                                                                                                                                                                                                                                                                                                                                                                                                                                                                                                                                                                                                                                                                                                                                                                                                                                                                          | NAD(P)-binding domain; Bicarbonate transporter, C-terminal; Glucose/ribitol dehydrogenase; Bicarbonate transporter, eukaryotic; NAD(P)-binding domain; Glucose/ribitol dehydrogenase                                                                                                                 |  |   |   |
| DEL27 | scaffold2 size2959145          | 1,919,880 | 1,928,240 | 8,360  | 7                                                                                                 | CP367 CP61 PL429.300 PL429.5000 PL429.600 PL429.miseq SZMC21154 SZMC8029 SZMC8092 SZMC8094                            | 1.23 1.46 0.34 0.36 0.35<br>0.39 2.95 1.24 1.28 1.13                        | no                         | g4002 g4003 g4004<br>g4005                                                                                                                                                                                                                                                                                                                                                                                                                                                                                                                                                                                                                                                                                                                                                                                                                                                                                                                                                           | Proteinase inhibitor, propeptide; Proteinase inhibitor I9                                                                                                                                                                                                                                            |  |   |   |
| DEL28 | scaffold2 size2959145          | 2,512,055 | 2,513,269 | 1,214  | 10                                                                                                | BP57 CP367 CP61 MCO448 PL429.300 PL429.5000 PL429.600 PL429.miseq SZMC21154 SZMC8029 SZMC8092 SZMC8094 SZMC8095       | 1.29 1.00 1.21 1.10 1.05<br>1.22 1.09 1.13 1.17 1.22<br>1.26 1.32 1.34      | no                         | .                                                                                                                                                                                                                                                                                                                                                                                                                                                                                                                                                                                                                                                                                                                                                                                                                                                                                                                                                                                    |                                                                                                                                                                                                                                                                                                      |  |   |   |
| DEL29 | scaffold2 size2959145          | 2,743,374 | 2,748,383 | 5,009  | 9                                                                                                 | BP57 CP61 MCO448 PL429.300 PL429.600 PL429.miseq PL448 SZMC21154 SZMC8029 SZMC8092 SZMC8095                           | 0.59 1.21 1.41 1.22 1.30<br>1.15 1.47 1.10 1.20 1.24<br>1.28                | no                         | g4347 g4348 g4349                                                                                                                                                                                                                                                                                                                                                                                                                                                                                                                                                                                                                                                                                                                                                                                                                                                                                                                                                                    |                                                                                                                                                                                                                                                                                                      |  |   |   |
| DEL30 | scaffold2 size2959145          | 2,814,593 | 2,816,446 | 1,853  | 7                                                                                                 | BP57 CP61 MCO448 SZMC21154 SZMC8029 SZMC8092 SZMC8095                                                                 | 1.35 1.25 0.75 1.21 1.29<br>1.13 0.90                                       | no                         | .                                                                                                                                                                                                                                                                                                                                                                                                                                                                                                                                                                                                                                                                                                                                                                                                                                                                                                                                                                                    |                                                                                                                                                                                                                                                                                                      |  |   |   |

|       |                       |           |           |       |    |                                                                                                                       |                                                                       |     |             |                                                                                                                                                                                                                                                                                    |  |  |   |  |
|-------|-----------------------|-----------|-----------|-------|----|-----------------------------------------------------------------------------------------------------------------------|-----------------------------------------------------------------------|-----|-------------|------------------------------------------------------------------------------------------------------------------------------------------------------------------------------------------------------------------------------------------------------------------------------------|--|--|---|--|
| DEL31 | scaffold2 size2959145 | 2,845,748 | 2,848,612 | 2,864 | 10 | CP367 CP61 MCO448 PL429.5000 PL429.600 PL429.miseq PL448 SZMC21154 SZMC8029 SZMC8092 SZMC8094 SZMC8095                | 1.05 1.32 0.63 1.29 1.11 0.86 1.15 1.18 1.29 1.13 1.14 0.88           | no  | .           |                                                                                                                                                                                                                                                                                    |  |  |   |  |
| DEL32 | scaffold2 size2959145 | 2,892,059 | 2,895,227 | 3,168 | 11 | BP57 CP367 CP61 MCO448 PL429.300 PL429.5000 PL429.600 PL429.miseq PL448 SZMC21154 SZMC8029 SZMC8092 SZMC8094 SZMC8095 | 1.44 1.32 1.48 1.39 1.46 1.46 1.48 1.41 1.41 1.36 1.43 1.47 1.36 1.36 | no  | g4408       | AMP-dependent synthetase/ligase                                                                                                                                                                                                                                                    |  |  |   |  |
| DEL33 | scaffold3 size1388033 | 17,480    | 19,007    | 1,527 | 5  | CP367 CP61 PL429.5000 PL429.600 PL448 SZMC8094                                                                        | 1.19 1.44 2.71 2.66 2.93 1.32                                         | no  | g1546       |                                                                                                                                                                                                                                                                                    |  |  |   |  |
| DEL34 | scaffold3 size1388033 | 102,152   | 105,897   | 3,745 | 11 | BP57 CP367 CP61 MCO448 PL429.300 PL429.5000 PL429.600 PL429.miseq PL448 SZMC21154 SZMC8029 SZMC8092 SZMC8094 SZMC8095 | 1.36 1.36 1.37 0.42 0.46 0.36 0.35 0.57 0.35 0.55 0.55 0.58 1.49 0.65 | no  | g1583 g1584 | Leucine-rich repeat; Leucine-rich repeat; Leucine rich repeat 4                                                                                                                                                                                                                    |  |  |   |  |
| DEL35 | scaffold3 size1388033 | 106,700   | 109,400   | 2,700 | 3  | MCO448 PL448 SZMC8095                                                                                                 | 0.57 1.14 1.25                                                        | no  | g1586       | Alpha-mannosyltransferase                                                                                                                                                                                                                                                          |  |  |   |  |
| DEL36 | scaffold3 size1388033 | 113,686   | 115,244   | 1,558 | 8  | BP57 CP367 CP61 PL429.300 PL429.5000 PL429.600 PL448 SZMC8029 SZMC8092 SZMC8094                                       | 1.26 1.26 1.23 1.19 1.41 1.10 1.23 1.21 1.29 1.49                     | no  | g1588       | Bromodomain                                                                                                                                                                                                                                                                        |  |  |   |  |
| DEL37 | scaffold3 size1388033 | 165,330   | 168,490   | 3,160 | 8  | CP367 MCO448 PL429.300 PL429.5000 PL429.miseq PL448 SZMC21154 SZMC8029 SZMC8092 SZMC8095                              | 1.32 1.24 1.37 1.39 1.39 1.16 1.09 0.55 1.39 1.39 1.44                | no  | g1614 g1615 |                                                                                                                                                                                                                                                                                    |  |  |   |  |
| DEL38 | scaffold3 size1388033 | 203,417   | 207,945   | 4,528 | 9  | BP57 CP367 CP61 PL429.300 PL429.5000 PL429.600 PL429.miseq PL448 SZMC21154 SZMC8029 SZMC8092 SZMC8094                 | 1.33 1.47 1.26 0.62 0.93 0.60 0.79 1.48 0.63 0.65 1.34 1.47           | no  | g1631 g1632 | Domain of unknown function DUF1212; Domain of unknown function DUF3815; Domain of unknown function DUF1212; Domain of unknown function DUF3815                                                                                                                                     |  |  |   |  |
| DEL39 | scaffold3 size1388033 | 234,030   | 235,403   | 1,373 | 10 | BP57 CP367 CP61 MCO448 PL429.300 PL429.5000 PL429.600 PL429.miseq PL448 SZMC8029 SZMC8092 SZMC8094 SZMC8095           | 1.19 1.05 1.21 1.39 1.09 1.30 1.19 1.46 1.01 1.17 1.21 1.34 1.39      | no  | g1645       | Aldolase-type TIM barrel; 2-nitropropane dioxygenase, NPD                                                                                                                                                                                                                          |  |  |   |  |
| DEL40 | scaffold3 size1388033 | 242,232   | 245,200   | 2,968 | 8  | BP57 CP61 MCO448 PL429.300 PL429.600 PL448 SZMC8029 SZMC8092 SZMC8095                                                 | 1.34 1.32 1.37 1.24 1.16 1.11 1.32 1.31 1.36                          | no  | g1650 g1651 | GPR1/FUN34/yaaH                                                                                                                                                                                                                                                                    |  |  |   |  |
| DEL41 | scaffold3 size1388033 | 248,590   | 250,960   | 2,370 | 10 | BP57 CP367 CP61 MCO448 PL429.300 PL429.5000 PL429.600 PL429.miseq PL448 SZMC8029 SZMC8092 SZMC8094 SZMC8095           | 1.15 1.07 1.22 1.17 1.12 1.24 1.17 1.10 1.03 1.14 1.16 1.19 1.20      | no  | g1653       | GPR1/FUN34/yaaH                                                                                                                                                                                                                                                                    |  |  |   |  |
| DEL42 | scaffold3 size1388033 | 319,608   | 320,754   | 1,146 | 10 | BP57 CP367 CP61 MCO448 PL429.300 PL429.600 PL429.miseq PL448 SZMC8029 SZMC8092 SZMC8094 SZMC8095                      | 1.38 1.24 1.30 0.75 1.30 1.37 1.30 0.89 1.32 1.37 0.97 0.96           | no  | g1684       | Major facilitator superfamily domain, general substrate transporter                                                                                                                                                                                                                |  |  |   |  |
| DEL43 | scaffold3 size1388033 | 365,541   | 370,487   | 4,946 | 11 | BP57 CP367 CP61 MCO448 PL429.300 PL429.5000 PL429.600 PL429.miseq PL448 SZMC21154 SZMC8029 SZMC8092 SZMC8094 SZMC8095 | 1.21 1.18 1.22 0.01 1.16 1.35 1.22 1.23 0.12 0.20 0.22 0.23 0.91 0.09 | yes | g1706 g1707 | Peptidase aspartic, catalytic; Peptidase aspartic; Peptidase A1; Peptidase aspartic, catalytic; Peptidase aspartic; Peptidase A1                                                                                                                                                   |  |  |   |  |
| DEL44 | scaffold3 size1388033 | 394,000   | 399,100   | 5,100 | 10 | BP57 CP367 CP61 PL429.300 PL429.600 PL448 SZMC21154 SZMC8029 SZMC8092 SZMC8094 SZMC8095                               | 1.45 1.43 1.41 1.41 1.41 1.31 0.46 1.35 1.37 1.43 1.48                | no  | g1717       |                                                                                                                                                                                                                                                                                    |  |  | x |  |
| DEL45 | scaffold3 size1388033 | 434,300   | 436,600   | 2,300 | 8  | BP57 CP367 CP61 PL429.300 PL429.600 PL429.miseq SZMC21154 SZMC8029 SZMC8092 SZMC8094                                  | 1.23 1.24 1.35 1.18 1.33 1.42 0.36 1.35 1.44 1.50                     | no  | g1737       |                                                                                                                                                                                                                                                                                    |  |  |   |  |
| DEL46 | scaffold3 size1388033 | 551,762   | 554,533   | 2,771 | 11 | BP57 CP367 CP61 MCO448 PL429.300 PL429.5000 PL429.600 PL429.miseq PL448 SZMC21154 SZMC8029 SZMC8092 SZMC8094 SZMC8095 | 1.30 1.10 1.20 1.13 1.27 1.35 0.92 1.33 0.95 1.18 1.21 1.25 1.27 1.39 | no  | .           |                                                                                                                                                                                                                                                                                    |  |  |   |  |
| DEL47 | scaffold3 size1388033 | 615,500   | 616,800   | 1,300 | 7  | CP367 MCO448 PL429.miseq PL448 SZMC8092 SZMC8094 SZMC8095                                                             | 1.37 0.22 1.03 0.47 0.98 0.92 0.85                                    | no  | .           |                                                                                                                                                                                                                                                                                    |  |  |   |  |
| DEL48 | scaffold3 size1388033 | 645,434   | 648,601   | 3,167 | 2  | PL429.600 SZMC8095                                                                                                    | 1.49 2.76                                                             | no  | g1821       |                                                                                                                                                                                                                                                                                    |  |  |   |  |
| DEL49 | scaffold3 size1388033 | 1,353,815 | 1,355,838 | 2,023 | 10 | BP57 CP367 CP61 PL429.300 PL429.5000 PL429.600 PL429.miseq PL448 SZMC21154 SZMC8029 SZMC8092 SZMC8094 SZMC8095        | 1.13 1.17 1.12 1.06 1.37 1.09 1.39 1.49 1.06 1.09 1.20 1.44 1.34      | no  | g2146       | Peptidase S10, serine carboxypeptidase, active site; Propeptide, carboxypeptidase Y; Peptidase S10, serine carboxypeptidase                                                                                                                                                        |  |  |   |  |
| DEL50 | scaffold4 size908642  | 152,735   | 154,008   | 1,273 | 11 | BP57 CP367 CP61 MCO448 PL429.300 PL429.5000 PL429.600 PL429.miseq PL448 SZMC21154 SZMC8029 SZMC8092 SZMC8094 SZMC8095 | 1.06 1.05 1.09 0.89 1.07 1.39 1.08 1.20 0.94 0.89 1.03 1.02 0.89 0.84 | no  | .           |                                                                                                                                                                                                                                                                                    |  |  |   |  |
| DEL51 | scaffold4 size908642  | 327,123   | 328,611   | 1,488 | 11 | BP57 CP367 CP61 MCO448 PL429.300 PL429.5000 PL429.600 PL429.miseq PL448 SZMC21154 SZMC8029 SZMC8092 SZMC8094 SZMC8095 | 1.22 1.12 1.18 1.29 1.15 1.30 1.12 1.29 1.04 1.08 1.22 1.21 1.29 1.30 | no  | g472        |                                                                                                                                                                                                                                                                                    |  |  |   |  |
| DEL52 | scaffold4 size908642  | 426,382   | 429,722   | 3,340 | 1  | PL429.300 PL429.5000 PL429.600 PL429.miseq                                                                            | 1.32 1.49 1.23 1.45                                                   | no  | g517 g518   | Major facilitator superfamily domain, general substrate transporter; General substrate transporter; Major facilitator superfamily domain; Major facilitator superfamily domain, general substrate transporter; General substrate transporter; Major facilitator superfamily domain |  |  |   |  |

|       |                       |         |         |       |    |                                                                                                                       |                                                                             |     |                         |                                                                                                                                                                                                                                                                                                                                                                                                                                                                                 |  |  |  |   |
|-------|-----------------------|---------|---------|-------|----|-----------------------------------------------------------------------------------------------------------------------|-----------------------------------------------------------------------------|-----|-------------------------|---------------------------------------------------------------------------------------------------------------------------------------------------------------------------------------------------------------------------------------------------------------------------------------------------------------------------------------------------------------------------------------------------------------------------------------------------------------------------------|--|--|--|---|
| DEL53 | scaffold4 size908642  | 489,759 | 493,368 | 3,609 | 11 | BP57 CP367 CP61 MCO448 PL429.300 PL429.600 PL429.miseq PL448 SZMC21154 SZMC8029 SZMC8092 SZMC8094 SZMC8095            | 1.36 1.29 1.34 1.35 1.39<br>1.43 1.19 1.29 1.35 1.47<br>1.48 1.05 1.25      | no  | g550 g551               | Ferredoxin reductase-type FAD-binding domain; Riboflavin synthase-like beta-barrel; Ferric reductase transmembrane component-like domain; FAD-binding 8; Ferric reductase, NAD binding; Ferredoxin reductase-type FAD-binding domain; Riboflavin synthase-like beta-barrel; Ferric reductase transmembrane component-like domain; FAD-binding 8; Ferric reductase, NAD binding                                                                                                  |  |  |  |   |
| DEL54 | scaffold4 size908642  | 517,174 | 518,284 | 1,110 | 9  | BP57 CP367 CP61 MCO448 PL429.300 PL429.5000 PL429.600 PL429.miseq PL448 SZMC8092 SZMC8094 SZMC8095                    | 1.34 1.34 1.26 0.85 0.22<br>0.13 0.13 0.37 1.03 1.26<br>1.19 1.00           | yes | .                       |                                                                                                                                                                                                                                                                                                                                                                                                                                                                                 |  |  |  |   |
| DEL55 | scaffold4 size908642  | 545,000 | 548,100 | 3,100 | 10 | BP57 CP61 MCO448 PL429.300 PL429.5000 PL429.600 PL429.miseq PL448 SZMC21154 SZMC8029 SZMC8092 SZMC8094 SZMC8095       | 1.29 1.29 0.50 1.22 1.21<br>1.32 0.94 0.66 1.07 1.13<br>1.14 1.20 0.70      | no  | .                       |                                                                                                                                                                                                                                                                                                                                                                                                                                                                                 |  |  |  |   |
| DEL56 | scaffold4 size908642  | 770,651 | 772,391 | 1,740 | 10 | CP367 CP61 MCO448 PL429.300 PL429.5000 PL429.600 PL429.miseq PL448 SZMC21154 SZMC8029 SZMC8092 SZMC8094 SZMC8095      | 1.06 0.81 1.39 0.97 1.33<br>0.92 1.30 1.18 1.04 0.97<br>1.12 1.24 1.14      | no  | g669 g670               |                                                                                                                                                                                                                                                                                                                                                                                                                                                                                 |  |  |  |   |
| DEL57 | scaffold4 size908642  | 843,400 | 844,900 | 1,500 | 9  | BP57 CP61 MCO448 PL429.300 PL429.5000 PL429.600 PL429.miseq PL448 SZMC21154 SZMC8029 SZMC8092 SZMC8095                | 1.41 1.42 0.33 0.54 0.40<br>0.34 0.79 0.28 0.79 0.76<br>0.83 0.91           | no  | .                       |                                                                                                                                                                                                                                                                                                                                                                                                                                                                                 |  |  |  |   |
| DEL58 | scaffold5 size1063617 | 213,869 | 216,916 | 3,047 | 9  | BP57 CP367 CP61 MCO448 PL429.300 PL429.5000 PL429.600 PL429.miseq SZMC8029 SZMC8092 SZMC8094 SZMC8095                 | 1.06 0.92 1.09 0.86 1.01<br>1.14 1.07 1.04 1.01 1.09<br>0.99 0.94           | no  | g1156 g1157             | Poly(A) polymerase; Poly(A) polymerase, RNA-binding domain; Nucleotidyltransferase, class I, C-terminal-like; Poly(A) polymerase, central domain; Nucleotidyl transferase domain; Mating-type protein MAT alpha 1; Alpha box                                                                                                                                                                                                                                                    |  |  |  |   |
| DEL59 | scaffold5 size1063617 | 218,719 | 226,776 | 8,057 | 11 | BP57 CP367 CP61 MCO448 PL429.300 PL429.5000 PL429.600 PL429.miseq PL448 SZMC21154 SZMC8029 SZMC8092 SZMC8094 SZMC8095 | 0.31 0.33 0.32 0.41 0.32<br>0.44 0.30 0.37 0.47 0.28<br>0.31 0.32 0.37 0.38 | no  | g1158 g1159             | Phosphatidylinositol 4-kinase; Phosphatidylinositol Kinase; Phosphatidylinositol 3-/4-kinase, catalytic domain; Protein kinase-like domain; Phosphatidylinositol 3/4-kinase, conserved site; Phosphatidylinositol 4-kinase, Pik1, fungi; Phosphatidylinositol 4-kinase; Phosphatidylinositol Kinase; Phosphatidylinositol 3/4-kinase, catalytic domain; Protein kinase-like domain; Phosphatidylinositol 3/4-kinase, conserved site; Phosphatidylinositol 4-kinase, Pik1, fungi |  |  |  | x |
| DEL60 | scaffold5 size1063617 | 393,140 | 396,154 | 3,014 | 11 | BP57 CP367 CP61 MCO448 PL429.300 PL429.600 PL448 SZMC21154 SZMC8029 SZMC8092 SZMC8094 SZMC8095                        | 1.38 1.36 1.38 1.34 1.26<br>1.35 1.39 1.26 0.68 1.39<br>1.48 1.39           | no  | g1241 g1242 g1240       | Steryl acetyl hydrolase; Steryl acetyl hydrolase; Steryl acetyl hydrolase; Lipase, GDYG, active site                                                                                                                                                                                                                                                                                                                                                                            |  |  |  |   |
| DEL61 | scaffold5 size1063617 | 454,240 | 457,163 | 2,923 | 7  | CP367 MCO448 PL429.300 PL429.miseq SZMC21154 SZMC8029 SZMC8092 SZMC8094                                               | 1.48 1.19 1.39 1.48 1.33<br>1.39 1.43 1.22                                  | no  | g1263 g1264             | Mediator complex, subunit Med14                                                                                                                                                                                                                                                                                                                                                                                                                                                 |  |  |  |   |
| DEL62 | scaffold6 size820601  | 116,984 | 122,149 | 5,165 | 10 | BP57 CP367 CP61 MCO448 PL429.300 PL429.5000 PL429.600 PL429.miseq SZMC21154 SZMC8029 SZMC8092 SZMC8094 SZMC8095       | 0.40 1.19 1.15 1.12 0.18<br>0.19 0.18 0.17 1.05 1.14<br>1.17 0.63 1.07      | yes | g781 g782 g783          | Zinc finger, CCCH-type; F-box domain, cyclin-like                                                                                                                                                                                                                                                                                                                                                                                                                               |  |  |  | x |
| DEL63 | scaffold6 size820601  | 133,496 | 136,635 | 3,139 | 7  | BP57 MCO448 PL429.300 PL429.5000 PL429.600 PL429.miseq SZMC21154 SZMC8029 SZMC8092 SZMC8095                           | 1.24 1.25 1.16 1.23 0.94<br>1.11 1.09 1.18 1.20 1.29                        | no  | g789 g790               | Zn(2)-C6 fungal-type DNA-binding domain                                                                                                                                                                                                                                                                                                                                                                                                                                         |  |  |  |   |
| DEL64 | scaffold6 size820601  | 150,530 | 152,258 | 1,728 | 9  | BP57 CP367 CP61 MCO448 PL429.300 PL429.5000 PL429.600 PL429.miseq SZMC21154 SZMC8029 SZMC8092 SZMC8095                | 1.03 1.16 1.07 2.98 1.03<br>1.29 1.03 1.46 1.00 1.07<br>1.11 1.35           | no  | g797                    |                                                                                                                                                                                                                                                                                                                                                                                                                                                                                 |  |  |  |   |
| DEL65 | scaffold6 size820601  | 169,513 | 173,531 | 4,018 | 9  | BP57 CP367 CP61 MCO448 PL429.300 PL429.5000 PL429.600 PL429.miseq SZMC21154 SZMC8029 SZMC8092 SZMC8095                | 1.36 1.26 1.37 0.66 1.36<br>1.37 1.38 1.24 1.22 1.31<br>1.29 0.84           | no  | g808                    |                                                                                                                                                                                                                                                                                                                                                                                                                                                                                 |  |  |  |   |
| DEL66 | scaffold6 size820601  | 323,769 | 324,914 | 1,145 | 11 | BP57 CP367 CP61 MCO448 PL429.300 PL429.5000 PL429.600 PL429.miseq PL448 SZMC21154 SZMC8029 SZMC8092 SZMC8094 SZMC8095 | 1.31 1.17 1.17 1.21 1.21<br>1.26 1.18 1.48 0.13 1.08<br>1.21 1.21 1.21 1.28 | yes | g872 g873               | Immunoglobulin E-set; Vacuolar protein sorting-associated protein 26                                                                                                                                                                                                                                                                                                                                                                                                            |  |  |  |   |
| DEL67 | scaffold6 size820601  | 676,095 | 680,540 | 4,445 | 9  | BP57 CP61 MCO448 PL429.300 PL429.5000 PL429.600 PL429.miseq PL448 SZMC21154 SZMC8029 SZMC8092 SZMC8095                | 1.33 1.32 0.67 0.55 0.58<br>0.43 0.84 0.54 0.63 0.71<br>0.70 0.82           | no  | g1006 g1007 g1008       | Major facilitator superfamily domain, general substrate transporter; Major facilitator superfamily; Major facilitator superfamily domain; Major facilitator superfamily domain, general substrate transporter; Major facilitator superfamily; Major facilitator superfamily domain; Conserved hypothetical protein CHP0092; Beta-grasp domain; GTP binding domain; TGS-like; TGS-like domain; Domain of unknown function DUF933                                                 |  |  |  |   |
| DEL68 | scaffold7 size2161850 | 73,828  | 76,442  | 2,614 | 10 | BP57 CP367 CP61 MCO448 PL429.300 PL448 SZMC21154 SZMC8092 SZMC8094 SZMC8095                                           | 0.92 1.04 1.43 1.07 1.46<br>1.22 1.37 1.10 1.17 1.04                        | no  | g2184 g2185             | FMN-binding split barrel-related; FMN-binding split barrel; Oxoglutarate/iron-dependent dioxygenase                                                                                                                                                                                                                                                                                                                                                                             |  |  |  |   |
| DEL69 | scaffold7 size2161850 | 108,069 | 114,600 | 6,531 | 11 | BP57 CP367 CP61 MCO448 PL429.300 PL429.5000 PL429.600 PL429.miseq PL448 SZMC21154 SZMC8029 SZMC8092 SZMC8094 SZMC8095 | 1.25 1.29 0.79 0.23 0.84<br>0.62 0.77 0.64 0.51 0.67<br>0.74 0.64 1.08 0.39 | no  | g2199 g2200 g2201 g2202 | F-box domain, cyclin-like; Steryl acetyl hydrolase                                                                                                                                                                                                                                                                                                                                                                                                                              |  |  |  | x |
| DEL70 | scaffold7 size2161850 | 132,000 | 133,400 | 1,400 | 5  | MCO448 PL429.miseq PL448 SZMC8094 SZMC8095                                                                            | 0.59 1.33 0.92 1.29 1.30                                                    | no  | .                       |                                                                                                                                                                                                                                                                                                                                                                                                                                                                                 |  |  |  |   |
| DEL71 | scaffold7 size2161850 | 383,929 | 385,960 | 2,031 | 11 | BP57 CP367 CP61 MCO448 PL429.300 PL429.5000 PL429.600 PL429.miseq PL448 SZMC21154 SZMC8029 SZMC8092 SZMC8094 SZMC8095 | 1.20 1.17 1.17 1.28 1.19<br>1.40 1.12 1.43 1.04 0.99<br>1.08 1.09 1.17 1.24 | no  | g2341                   | Amino acid/polyamine transporter I                                                                                                                                                                                                                                                                                                                                                                                                                                              |  |  |  |   |



|       |                       |           |           |       |    |                                                                                                                       |                                                                       |    |                               |                                                                                                                                                                                                                                                                                                                                                                                |  |  |  |
|-------|-----------------------|-----------|-----------|-------|----|-----------------------------------------------------------------------------------------------------------------------|-----------------------------------------------------------------------|----|-------------------------------|--------------------------------------------------------------------------------------------------------------------------------------------------------------------------------------------------------------------------------------------------------------------------------------------------------------------------------------------------------------------------------|--|--|--|
| DEL72 | scaffold7 size2161850 | 619,286   | 620,929   | 1,643 | 11 | BP57 CP367 CP61 MCO448 PL429.300 PL429.5000 PL429.600 PL429.miseq PL448 SZMC21154 SZMC8029 SZMC8092 SZMC8094 SZMC8095 | 1.36 1.20 1.42 1.18 1.20 1.44 1.33 1.26 1.05 1.16 1.29 1.31 1.33 1.29 | no | g2443                         | NAD(P)-binding domain; Alcohol dehydrogenase superfamily, zinc-type; Polyketide synthase, enoylreductase; GroES-like                                                                                                                                                                                                                                                           |  |  |  |
| DEL73 | scaffold7 size2161850 | 675,071   | 676,401   | 1,330 | 11 | BP57 CP367 CP61 MCO448 PL429.300 PL429.5000 PL429.600 PL429.miseq PL448 SZMC21154 SZMC8029 SZMC8092 SZMC8094 SZMC8095 | 1.28 1.21 1.25 1.19 1.22 1.21 1.13 1.41 1.13 1.09 1.17 1.24 1.03 1.05 | no | .                             |                                                                                                                                                                                                                                                                                                                                                                                |  |  |  |
| DEL74 | scaffold7 size2161850 | 738,355   | 743,173   | 4,818 | 11 | BP57 CP367 CP61 MCO448 PL429.300 PL429.5000 PL429.600 PL429.miseq PL448 SZMC21154 SZMC8029 SZMC8092 SZMC8094 SZMC8095 | 0.94 0.90 0.94 1.11 0.94 1.29 0.88 0.96 0.98 0.81 0.89 0.93 0.92 1.01 | no | g2501 g2502 g2503 g2504 g2505 | Transcriptional adaptor 2; Zinc finger, ZZ-type; Homeodomain-like; SANT/Myb domain; SWIRM domain; SANT domain; Ribosomal protein S17e; Ribosomal protein S17e, conserved site; Transcriptional adaptor 2; Zinc finger, ZZ-type; Homeodomain-like; SANT/Myb domain; SWIRM domain; SANT domain                                                                                   |  |  |  |
| DEL75 | scaffold7 size2161850 | 882,532   | 887,526   | 4,994 | 1  | PL429.300 PL429.5000 PL429.600 PL429.miseq                                                                            | 0.94 1.20 0.99 0.90                                                   | no | g2576 g2577                   | Ferredoxin reductase-type FAD-binding domain; Riboflavin synthase-like beta-barrel; Ferric reductase transmembrane component-like domain; FAD-binding 8; Ferric reductase, NAD binding; Ferredoxin reductase-type FAD-binding domain; Riboflavin synthase-like beta-barrel; Ferric reductase transmembrane component-like domain; FAD-binding 8; Ferric reductase, NAD binding |  |  |  |
| DEL76 | scaffold7 size2161850 | 1,069,267 | 1,072,457 | 3,190 | 7  | MCO448 PL429.300 PL429.600 PL429.miseq PL448 SZMC21154 SZMC8029 SZMC8092 SZMC8095                                     | 1.30 1.26 1.34 1.46 1.32 1.19 1.29 1.32 1.32                          | no | g2663 g2664 g2665             | RmlC-like cupin domain; Acireductone dioxigenase ARD family; RmlC-like jelly roll fold; F-box domain, cyclin-like; Pre-mRNA-splicing factor 38                                                                                                                                                                                                                                 |  |  |  |
| DEL77 | scaffold7 size2161850 | 1,151,054 | 1,152,251 | 1,197 | 11 | BP57 CP367 CP61 MCO448 PL429.300 PL429.5000 PL429.600 PL448 SZMC21154 SZMC8029 SZMC8092 SZMC8094 SZMC8095             | 0.59 1.44 1.34 0.83 1.41 1.35 1.47 0.86 1.23 1.30 1.21 1.02 1.08      | no | g2704                         | Protein of unknown function DUF1748, fungi                                                                                                                                                                                                                                                                                                                                     |  |  |  |
| DEL78 | scaffold7 size2161850 | 1,280,575 | 1,284,518 | 3,943 | 11 | BP57 CP367 CP61 MCO448 PL429.300 PL429.5000 PL429.600 PL429.miseq PL448 SZMC21154 SZMC8029 SZMC8092 SZMC8094 SZMC8095 | 0.38 1.11 1.08 0.85 1.22 1.34 1.32 1.19 0.95 1.11 1.18 1.14 1.03 0.97 | no | g2762 g2763                   | NAD(P)-binding domain; NAD-dependent epimerase/dehydratase; LicD                                                                                                                                                                                                                                                                                                               |  |  |  |
| DEL79 | scaffold7 size2161850 | 1,614,227 | 1,618,443 | 4,216 | 11 | BP57 CP367 CP61 MCO448 PL429.300 PL429.5000 PL429.600 PL429.miseq PL448 SZMC21154 SZMC8029 SZMC8092 SZMC8094 SZMC8095 | 1.04 0.97 1.07 0.91 1.06 1.25 1.12 0.98 0.94 1.01 1.10 1.09 0.96 0.96 | no | g2910 g2911                   | Heat shock protein 9/12; Lipase, secreted                                                                                                                                                                                                                                                                                                                                      |  |  |  |
| DEL80 | scaffold7 size2161850 | 1,628,852 | 1,632,129 | 3,277 | 11 | BP57 CP367 CP61 MCO448 PL429.300 PL429.5000 PL429.600 PL429.miseq PL448 SZMC21154 SZMC8029 SZMC8092 SZMC8094 SZMC8095 | 1.14 1.20 1.17 0.96 1.11 1.35 1.33 1.24 1.10 1.04 1.10 1.14 0.94 0.92 | no | g2917 g2918 g2919             | Thymidylate synthase; Thymidylate synthase/dCMP hydroxymethylase domain; Thymidylate synthase, active site                                                                                                                                                                                                                                                                     |  |  |  |
| DEL81 | scaffold7 size2161850 | 1,667,693 | 1,671,565 | 3,872 | 11 | BP57 CP367 CP61 MCO448 PL429.300 PL429.5000 PL429.600 PL429.miseq PL448 SZMC21154 SZMC8029 SZMC8092 SZMC8094 SZMC8095 | 1.01 1.11 0.97 1.25 1.05 1.48 1.11 0.97 1.08 0.93 1.02 1.00 1.12 1.16 | no | g2934 g2935                   |                                                                                                                                                                                                                                                                                                                                                                                |  |  |  |
| DEL82 | scaffold7 size2161850 | 2,097,824 | 2,099,217 | 1,393 | 5  | CP61 PL429.300 PL429.5000 PL429.600 SZMC21154 SZMC8094 SZMC8095                                                       | 1.26 1.14 1.30 1.14 1.08 2.50 1.20                                    | no | g3114                         | CDR ABC transporter                                                                                                                                                                                                                                                                                                                                                            |  |  |  |
| DEL83 | scaffold7 size2161850 | 2,127,991 | 2,130,943 | 2,952 | 8  | MCO448 PL429.300 PL429.5000 PL429.600 PL429.miseq PL448 SZMC21154 SZMC8029 SZMC8092 SZMC8094 SZMC8095                 | 0.73 0.64 0.68 0.61 0.84 0.69 0.73 0.75 0.82 2.69 0.83                | no | g3130 g3131                   | DNA primase, small subunit, eukaryotic/archaeal; DNA primase, small subunit; Major facilitator superfamily domain, general substrate transporter; Major facilitator superfamily; Major facilitator superfamily domain                                                                                                                                                          |  |  |  |
| DEL84 | scaffold9 size263853  | 38,600    | 41,200    | 2,600 | 11 | BP57 CP367 CP61 MCO448 PL429.300 PL429.5000 PL429.600 PL429.miseq PL448 SZMC21154 SZMC8029 SZMC8092 SZMC8094 SZMC8095 | 1.04 1.03 1.09 0.72 0.97 1.13 1.00 0.88 0.88 1.01 1.05 1.04 0.89 0.79 | no | g86 g87                       | Tricalbin; C2 membrane targeting protein; C2 calcium-dependent membrane targeting; C2 calcium/lipid-binding domain, CaLB; Ribosomal protein S3Ae                                                                                                                                                                                                                               |  |  |  |
