# Supplementary material for: The Genomic Aftermath of Hybridization in the Opportunistic Pathogen Candida metapsilosis
Source: PubMed Central journal article supplement (PMC4627764; doi:10.1371/journal.pgen.1005626), 2015-10-30
Supplement: pgen.1005626.s019.pdf [file pgen.1005626.s019.pdf]

| cluster_id | #me | #  | CANME         | # | CANOR        | #  | CANPA        | functions                                                                                                                                              | CANME - | CANME - CANOR | LEGEND                        |
|------------|-----|----|---------------|---|--------------|----|--------------|--------------------------------------------------------------------------------------------------------------------------------------------------------|---------|---------------|-------------------------------|
| 1          | 23  | 7  | g1003.t1 g1   | 6 | CORT_0G00120 | 10 | CPAR2_300590 | Major facilitator superfamily domain, general substrate transporter; Major facilitator superfamily; Major facilitator superfamily domain               | -3      | 1             | Hyphally-regulated            |
| 2          | 23  | 12 | g1626.t1 g1   | 6 | CORT_0B02520 | 5  | CPAR2_502340 | GPR1/FUN34/yaaH                                                                                                                                        | 7       | 6             | membrane                      |
| 3          | 21  | 7  | g1071.t1 g1   | 6 | CORT_0C04690 | 8  | CPAR2_300010 | ABC transporter-like; ABC transporter, conserved site; CDR ABC transporter; AAA+ ATPase domain; ABC-2 type transporter; Pleiotropic drug r             | -1      | 1             | Major facilitator superfamily |
| 4          | 21  | 5  | g1756.t1 g1   | 2 | CORT_0C02750 | 14 | CPAR2_106910 | PT repeat; Hyphally-regulated cell wall protein, N-terminal                                                                                            | -9      | 3             | *porter                       |
| 5          | 20  | 7  | g1061.t1 g2   | 6 | CORT_0B00170 | 7  | CPAR2_300110 | Extracellular membrane protein, CFEM domain; Extracellular membrane protein, CFEM domain, fungi                                                        | 0       | 1             | Agglutinin-like               |
| 6          | 20  | 9  | g1383.t1 g2   | 4 | CORT_0A00350 | 7  | CPAR2_701630 | Tetrapeptide transporter, OPT1/isp4; Oligopeptide transporter OPT superfamily                                                                          | 2       | 5             | Peptidase                     |
| 7          | 18  | 5  | g3873.t1 g5   | 4 | CORT_0C00760 | 9  | CPAR2_400100 | Major facilitator superfamily domain, general substrate transporter; Major facilitator superfamily; General substrate transporter; Major facilitator s | -4      | 1             | Flocculin                     |
| 8          | 18  | 7  | g2616.t1 g2   | 4 | CORT_0A06610 | 7  | CPAR2_207250 | Major facilitator superfamily domain, general substrate transporter; Major facilitator superfamily                                                     | 0       | 3             | Lipase                        |
| 9          | 17  | 5  | g1142.t1 g1   | 5 | CORT_0B00800 | 7  | CPAR2_303790 | Uncharacterised domain Flo11-reatedl, N-terminal; Fibrogen-binding, domain 1; Agglutinin-like protein, N-terminal; Flocculin type 3 repeat; Adh        | -2      | 0             |                               |
| 10         | 17  | 7  | g44.t1 g50    | 4 | CORT_0B09350 | 6  | CPAR2_108210 | Major facilitator superfamily domain, general substrate transporter; Sugar/inositol transporter; General substrate transporter; Major facilitator su   | 1       | 3             |                               |
| 11         | 16  | 8  | g1233.t1 g1   | 3 | CORT_0E04910 | 5  | CPAR2_302730 | Steryl acetyl hydrolase                                                                                                                                | 3       | 5             |                               |
| 12         | 16  | 4  | g2859.t1 g2   | 5 | CORT_0A06440 | 7  | CPAR2_103130 | Pyridine nucleotide-disulphide oxidoreductase, class-II; NAD(P)-binding domain; Amino acid/polyamine transporter I; FAD-dependent pyridine n           | -3      | -1            |                               |
| 13         | 15  | 4  | g2334.t1 g2   | 4 | CORT_0A11680 | 7  | CPAR2_203150 | Amino acid/polyamine transporter I                                                                                                                     | -3      | 0             |                               |
| 14         | 15  | 3  | g1683.t1 g1   | 7 | CORT_0G03030 | 5  | CPAR2_702920 | Major facilitator superfamily domain, general substrate transporter; Major facilitator superfamily                                                     | -2      | -4            |                               |
| 15         | 15  | 9  | g39.t1 g40.t1 | 2 | CORT_0C01430 | 4  | CPAR2_807600 | Acyl-CoA oxidase/dehydrogenase, central domain; Acyl-CoA oxidase; Acyl-CoA oxidase, C-terminal; Acyl-CoA oxidase/dehydrogenase, type 1;                | 5       | 7             |                               |
| 16         | 13  | 6  | g1973.t1 g2   | 2 | CORT_0D03890 | 5  | CPAR2_203780 | Cytochrome P450, E-class, CYP52; Cytochrome P450, E-class, group II; Cytochrome P450; Cytochrome P450, conserved site                                  | 1       | 4             |                               |
| 17         | 13  | 4  | g2033.t1 g2   | 4 | CORT_0C06190 | 5  | CPAR2_204150 | Flavodoxin/nitric oxide synthase; Flavoprotein WrbA; NADPH-dependent FMN reductase                                                                     | -1      | 0             |                               |
| 18         | 12  | 5  | g5254.t1 g5   | 4 | CORT_0B06800 | 3  | CPAR2_105580 | Metallophosphoesterase domain; RNA recognition motif domain; Nucleotide-binding, alpha-beta plait                                                      | 2       | 1             |                               |
| 19         | 12  | 5  | g904.t1 g90   | 2 | CORT_0H01780 | 5  | CPAR2_701660 | AMP-dependent synthetase/ligase                                                                                                                        | 0       | 3             |                               |
| 20         | 11  | 4  | g2576.t1 g2   | 4 | CORT_0A09370 | 3  | CPAR2_210110 | Ferredoxin reductase-type FAD-binding domain; Riboflavin synthase-like beta-barrel; Ferric reductase transmembrane component-like domain;              | 1       | 0             |                               |
| 21         | 11  | 2  | g3470.t1 g3   | 4 | CORT_0D00610 | 5  | CPAR2_110430 | D-isomer specific 2-hydroxyacid dehydrogenase, catalytic domain; Pre-ATP-grasp fold; NAD(P)-binding domain; D-isomer specific 2-hydroxyaci             | -3      | -2            |                               |
| 22         | 10  | 4  | g1904.t1 g4   | 3 | CORT_0A01380 | 3  | CPAR2_405490 | ABC transporter, transmembrane domain; CheY-like superfamily; ABC transporter-like; HAMP linker domain; ABC transporter, conserved site;               | 1       | 1             |                               |
| 23         | 10  | 6  | g5214.t1 g5   | 2 | CORT_0C02740 | 2  | CPAR2_806390 | Hyphally-regulated cell wall protein, N-terminal                                                                                                       | 4       | 4             |                               |
| 24         | 10  | 4  | g4583.t1 g4   | 2 | CORT_0A02750 | 4  | CPAR2_802690 | Major facilitator superfamily domain, general substrate transporter; Major facilitator superfamily; Major facilitator superfamily domain               | 0       | 2             |                               |
| 25         | 10  | 5  | g5128.t1 g5   | 3 | CORT_0B05600 | 2  | CPAR2_104460 | NAD(P)-binding domain; NAD-dependent epimerase/dehydratase                                                                                             | 3       | 2             |                               |
| 26         | 10  | 3  | g3442.t1 g4   | 3 | CORT_0A03070 | 4  | CPAR2_203160 | ATP-grasp fold, subdomain 1; ATP-grasp fold; ATP-grasp fold, subdomain 2; Glutamine amidotransferase type 1; Pre-ATP-grasp fold; Aminoac               | -1      | 0             |                               |
| 27         | 9   | 4  | g1700.t1 g2   | 1 | CORT_0A00240 | 4  | CPAR2_800120 | NAD(P)-binding domain; Short-chain dehydrogenase/reductase, conserved site; Short-chain dehydrogenase/reductase SDR; Glucose/ribitol de                | 0       | 3             |                               |
| 28         | 9   | 4  | g2255.t1 g2   | 2 | CORT_0A12540 | 3  | CPAR2_213230 | Amino acid permease, conserved site; Amino acid/polyamine transporter I                                                                                | 1       | 2             |                               |
| 29         | 9   | 2  | g4953.t1 g4   | 3 | CORT_0B03810 | 4  | CPAR2_102400 | Peptidase aspartic, catalytic; Peptidase aspartic; Peptidase aspartic, active site; Peptidase A1                                                       | -2      | -1            |                               |
| 30         | 9   | 4  | g3562.t1 g3   | 3 | CORT_0D04510 | 2  | CPAR2_204420 | Alcohol dehydrogenase, long-chain fatty; Glucose-methanol-choline oxidoreductase, N-terminal; Glucose-methanol-choline oxidoreductase, C-t             | 2       | 1             |                               |
| 31         | 9   | 4  | g1437.t1 g1   | 2 | CORT_0C07330 | 3  | CPAR2_407980 | Peptidase S10, serine carboxypeptidase, active site; Propeptide, carboxypeptidase Y; Peptidase S10, serine carboxypeptidase                            | 1       | 2             |                               |
| 32         | 9   | 4  | g3014.t1 g3   | 3 | CORT_0D04710 | 2  | CPAR2_101160 | Methyltransferase type 11                                                                                                                              | 2       | 1             |                               |
| 33         | 8   | 2  | g34.t1 g598   | 3 | CORT_0A05690 | 3  | CPAR2_206340 | HAD-like domain; Phosphoribosyl pyrophosphate synthetase, conserved site; Ribose-phosphate diphosphokinase; Phosphoribosyltransferase d                | -1      | -1            |                               |
| 34         | 8   | 3  | g2797.t1 g4   | 3 | CORT_0A03860 | 2  | CPAR2_207780 | Catalase-like domain; Catalase, mono-functional, haem-containing; Catalase, mono-functional, haem-containing, clades 1 and 3; Catalase core            | 1       | 0             |                               |
| 35         | 8   | 2  | g3476.t1 g4   | 3 | CORT_0B03410 | 3  | CPAR2_102100 | Major facilitator superfamily domain, general substrate transporter; Major facilitator superfamily; Major facilitator superfamily domain               | -1      | -1            |                               |
| 36         | 8   | 4  | g1505.t1 g1   | 2 | CORT_0G00410 | 2  | CPAR2_700290 | RHO protein GDP dissociation inhibitor; Immunoglobulin E-set; Rho GDP-dissociation inhibitor domain                                                    | 2       | 2             |                               |
| 37         | 8   | 3  | g3918.t1 g3   | 1 | CORT_0B01330 | 4  | CPAR2_501140 | NAD(P)-binding domain; Short-chain dehydrogenase/reductase, conserved site; Short-chain dehydrogenase/reductase SDR; Glucose/ribitol de                | -1      | 2             |                               |
| 38         | 8   | 4  | g516.t1 g51   | 3 | CORT_0E02090 | 3  | CPAR2_107230 | Major facilitator superfamily domain, general substrate transporter; General substrate transporter; Major facilitator superfamily domain               | 1       | 3             |                               |
| 39         | 8   | 2  | g4716.t2 g4   | 3 | CORT_0A04060 | 3  | CPAR2_804030 | Peptidase S8, subtilisin, Ser-active site; Peptidase S8/S53, subtilisin/kexin/sedolisin; Glycosyl transferase, family 48; Proteinase inhibitor, prope  | -1      | -1            |                               |
| 40         | 8   | 4  | g4874.t1 g4   | 2 | CORT_0B03080 | 2  | CPAR2_101790 | Mg2+ transporter protein, CorA-like/Zinc transport protein ZntB                                                                                        | 2       | 2             |                               |
| 41         | 8   | 2  | g4216.t1 g4   | 2 | CORT_0F02740 | 4  | CPAR2_601730 | Acyl transferase/acyl hydrolase/lysophospholipase; Lysophospholipase, catalytic domain                                                                 | -2      | 0             |                               |
| 42         | 8   | 2  | g358.t1 g84   | 3 | CORT_0D06640 | 3  | CPAR2_403590 | Glycosyl transferase, family 15                                                                                                                        | -1      | -1            |                               |
| 43         | 8   | 2  | g5735.t1 g5   | 3 | CORT_0C01230 | 3  | CPAR2_806680 | Anp1; Structural maintenance of chromosomes protein; RecF/RecN/SMC; SMCs flexible hinge                                                                | -1      | -1            |                               |
| 44         | 7   | 3  | g1880.t1 g1   | 2 | CORT_0C04670 | 2  | CPAR2_405260 | Zn(2)-C6 fungal-type DNA-binding domain; Transcription factor, fungi                                                                                   | 1       | 1             |                               |
| 45         | 7   | 3  | g3448.t1 g5   | 1 | CORT_0C00280 | 3  | CPAR2_107010 | Histone-fold; Histone H3; Histone core                                                                                                                 | 0       | 2             |                               |
| 46         | 7   | 3  | g3480.t1 g4   | 2 | CORT_0B03160 | 2  | CPAR2_101860 | Amino acid permease, conserved site; Amino acid permease domain; Amino acid/polyamine transporter I                                                    | 1       | 1             |                               |
| 47         | 7   | 3  | g225.t1 g24   | 1 | CORT_0A04310 | 3  | CPAR2_800760 | Major facilitator superfamily domain, general substrate transporter; Proton-dependent oligopeptide transporter family; PTR2 family proton/oligop       | 0       | 2             |                               |
| 48         | 7   | 5  | g1076.t1 g1   | 1 | CORT_0A00100 | 1  | CPAR2_704320 | Monoxygenase, FAD-binding; Aromatic-ring hydroxylase-like                                                                                              | 4       | 4             |                               |
| 49         | 7   | 5  | g4408.t1 g4   | 1 | CORT_0B03710 | 1  | CPAR2_102550 | AMP-dependent synthetase/ligase                                                                                                                        | 4       | 4             |                               |
| 50         | 7   | 3  | g1422.t1 g1   | 2 | CORT_0G01300 | 2  | CPAR2_701130 | Acyl transferase/acyl hydrolase/lysophospholipase; Lysophospholipase, catalytic domain                                                                 | 1       | 1             |                               |
| 51         | 7   | 2  | g4819.t1 g4   | 2 | CORT_0A05100 | 3  | CPAR2_805010 | Carboxymuconolactone decarboxylase                                                                                                                     | -1      | 0             |                               |

|     |   |   |             |   |              |   |              |                                                                                                                                                        |    |    |  |  |
|-----|---|---|-------------|---|--------------|---|--------------|--------------------------------------------------------------------------------------------------------------------------------------------------------|----|----|--|--|
| 52  | 7 | 3 | g4603.t1 g5 | 2 | CORT_0A02940 | 2 | CPAR2_802890 | Major facilitator superfamily domain, general substrate transporter; Major facilitator superfamily; Major facilitator superfamily domain               | 1  | 1  |  |  |
| 53  | 7 | 3 | g1810.t1 g2 | 2 | CORT_0A11980 | 2 | CPAR2_212680 | Helicase, superfamily 1/2, ATP-binding domain; Homeodomain-like; SNF2-related; SANT/Myb domain; ATPase, nucleosome remodelling ISWI,                   | 1  | 1  |  |  |
| 54  | 7 | 3 | g2851.t1 g2 | 2 | CORT_0A06360 | 2 | CPAR2_207000 | Enolase, N-terminal; Enolase, C-terminal; Enolase, conserved site; Enolase                                                                             | 1  | 1  |  |  |
| 55  | 7 | 1 | g2722.t1    | 3 | CORT_0A07900 | 3 | CPAR2_208620 | Peptidase C13, legumain; Helicase, superfamily 1/2, ATP-binding domain; DNA polymerase alpha, subunit B N-terminal; Helicase, C-terminal;              | -2 | -2 |  |  |
| 56  | 7 | 2 | g3858.t1 g4 | 3 | CORT_0A04760 | 2 | CPAR2_501780 | Polyketide synthase, enoylreductase; Alcohol dehydrogenase superfamily, zinc-type; GroES-like; Alcohol dehydrogenase GroES-like; Alcohol d             | 0  | -1 |  |  |
| 57  | 7 | 4 | g1565.t1 g2 | 2 | CORT_0G04170 | 1 | CPAR2_103100 | F-box domain, cyclin-like                                                                                                                              | 3  | 2  |  |  |
| 58  | 7 | 2 | g127.t1 g64 | 3 | CORT_0B11030 | 2 | CPAR2_109920 | Major facilitator superfamily domain, general substrate transporter; Sugar transporter, conserved site; General substrate transporter; Major facili    | 0  | -1 |  |  |
| 59  | 7 | 2 | g4044.t1 g5 | 2 | CORT_0B06970 | 3 | CPAR2_105760 | ATPase, P-type, K/Mg/Cd/Cu/Zn/Na/Ca/Na/H-transporter; ATPase, P-type, cytoplasmic domain N; ATPase, P-type, transmembrane domain; A                    | -1 | 0  |  |  |
| 60  | 7 | 3 | g1661.t1 g1 | 2 | CORT_0G03360 | 2 | CPAR2_703190 | Lipase, secreted                                                                                                                                       | 1  | 1  |  |  |
| 61  | 7 | 2 | g4999.t1 g6 | 2 | CORT_0B04350 | 3 | CPAR2_103080 | ThiJ/Pfpl                                                                                                                                              | -1 | 0  |  |  |
| 62  | 7 | 3 | g1933.t1 g5 | 2 | CORT_0B08170 | 2 | CPAR2_106960 | Acetate-CoA ligase; Acyl-CoA synthase, domain of unknown function DUF3448; AMP-dependent synthetase/ligase; Domain of unknown functio                  | 1  | 1  |  |  |
| 63  | 7 | 3 | g1525.t1 g1 | 2 | CORT_0G00220 | 2 | CPAR2_700110 | Major facilitator superfamily domain, general substrate transporter; Major facilitator superfamily; Major facilitator superfamily domain               | 1  | 1  |  |  |
| 64  | 7 | 3 | g1219.t2 g2 | 2 | CORT_0C06580 | 2 | CPAR2_302950 | Luciferase-like domain; Nitritotriacetate monooxygenase component A/pristinamycin IIA synthase subunit A                                               | 1  | 1  |  |  |
| 65  | 7 | 3 | g212.t1 g21 | 2 | CORT_0A00770 | 2 | CPAR2_800690 | CPAR2_801040                                                                                                                                           | 1  | 1  |  |  |
| 66  | 7 | 4 | g3081.t1 g3 | 2 | CORT_0F00580 | 1 | CPAR2_100490 | Major facilitator superfamily domain, general substrate transporter; Major facilitator superfamily; General substrate transporter; Major facilitator s | 3  | 2  |  |  |
| 67  | 7 | 1 | g3303.t1    | 3 | CORT_0D01800 | 3 | CPAR2_201740 | Neuraminidase; VPS10                                                                                                                                   | -2 | -2 |  |  |
| 68  | 7 | 2 | g2798.t1 g2 | 3 | CORT_0A07100 | 2 | CPAR2_207750 | LicD                                                                                                                                                   | 0  | -1 |  |  |
| 69  | 7 | 1 | g3530.t1    | 3 | CORT_0D04210 | 3 | CPAR2_204110 | Alpha-mannosyltransferase                                                                                                                              | -2 | -2 |  |  |
| 70  | 7 | 1 | g4468.t1    | 3 | CORT_0A01725 | 3 | CPAR2_801655 | Major facilitator superfamily domain, general substrate transporter; Sugar transporter, conserved site; General substrate transporter; Major facili    | -2 | -2 |  |  |
| 71  | 6 | 3 | g2456.t1 g2 | 2 | CORT_0A10520 | 1 | CPAR2_101810 | Short-chain dehydrogenase/reductase, conserved site; NAD(P)-binding domain; Glucose/ribitol dehydrogenase; Short-chain dehydrogenase/re                | 2  | 1  |  |  |
| 72  | 6 | 3 | g4227.t1 g4 | 1 | CORT_0F02900 | 2 | CPAR2_601860 | Glycine cleavage T-protein, N-terminal; Glycine cleavage system T protein; Glycine cleavage T-protein, C-terminal barrel                               | 1  | 2  |  |  |
| 73  | 6 | 1 | g5028.t1    | 3 | CORT_0B04580 | 2 | CPAR2_103330 | Domain of unknown function DUF3533                                                                                                                     | -1 | -2 |  |  |
| 74  | 6 | 1 | g5362.t1    | 3 | CORT_0B07920 | 2 | CPAR2_106670 | Amino acid permease domain; Amino acid/polyamine transporter I                                                                                         | -1 | -2 |  |  |
| 75  | 6 | 2 | g4613.t1 g4 | 1 | CORT_0A03060 | 3 | CPAR2_803020 | Major facilitator superfamily domain, general substrate transporter; Major facilitator superfamily                                                     | -1 | 1  |  |  |
| 76  | 6 | 1 | g4235.t1    | 3 | CORT_0B04740 | 2 | CPAR2_103530 | Major facilitator superfamily domain, general substrate transporter; Major facilitator superfamily                                                     | -1 | -2 |  |  |
| 77  | 6 | 3 | g55.t1 g561 | 1 | CORT_0B10520 | 2 | CPAR2_109400 | NADH:ubiquinone oxidoreductase intermediate-associated protein 30; Galactose-binding domain-like                                                       | 1  | 2  |  |  |
| 78  | 6 | 3 | g669.t1 g67 | 1 | CORT_0E00570 | 2 | CPAR2_400440 | CPAR2_400540                                                                                                                                           | 1  | 2  |  |  |
| 79  | 6 | 1 | g181.t1     | 2 | CORT_0E03680 | 3 | CPAR2_403670 | Amino acid permease, conserved site; Amino acid permease domain; Amino acid/polyamine transporter I                                                    | -2 | -1 |  |  |
| 80  | 6 | 4 | g366.t1 g82 | 1 | CORT_0E03470 | 1 | CPAR2_403560 |                                                                                                                                                        | 3  | 3  |  |  |
| 81  | 6 | 1 | g1016.t1    | 2 | CORT_0H00650 | 3 | CPAR2_300580 | Ferredoxin reductase-type FAD-binding domain; Riboflavin synthase-like beta-barrel; Ferric reductase transmembrane component-like domain;              | -2 | -1 |  |  |
| 82  | 6 | 4 | g1320.t1 g1 | 1 | CORT_0C03440 | 1 | CPAR2_805720 |                                                                                                                                                        | 3  | 3  |  |  |
| 83  | 5 | 1 | g5815.t1    | 2 | CORT_0C01600 | 2 | CPAR2_807530 | Manganese/iron superoxide dismutase, C-terminal; Manganese/iron superoxide dismutase; Pal1 cell morphology; Manganese/iron superoxide                  | -1 | -1 |  |  |
| 84  | 5 | 2 | g1825.t1 g1 | 2 | CORT_0A05820 | 1 | CPAR2_404710 |                                                                                                                                                        | 1  | 0  |  |  |
| 85  | 5 | 1 | g3074.t1    | 2 | CORT_0F00660 | 2 | CPAR2_100560 | Amino acid permease, conserved site; Amino acid permease domain; Amino acid permease, fungi; Amino acid/polyamine transporter I                        | -1 | -1 |  |  |
| 86  | 5 | 1 | g5000.t1    | 2 | CORT_0B04360 | 2 | CPAR2_103090 | Alkaline-phosphatase-like, core domain; Alkaline phosphatase-like, alpha/beta/alpha; Sulfatase; Sulfatase, conserved site                              | -1 | -1 |  |  |
| 87  | 5 | 1 | g888.t1     | 2 | CORT_0H01930 | 2 | CPAR2_805560 | Ribosomal protein L27; Ribosomal protein L27, conserved site; Uncharacterised protein family UPF0303; Domain of unknown function DUF336                | -1 | -1 |  |  |
| 88  | 5 | 1 | g5765.t1    | 2 | CORT_0C02160 | 2 | CPAR2_807000 | CPAR2_807010                                                                                                                                           | -1 | -1 |  |  |
| 89  | 5 | 1 | g4082.t1    | 2 | CORT_0H02410 | 2 | CPAR2_600370 | Cytochrome c oxidase, subunit VIb; DNA/RNA-binding protein Alba-like                                                                                   | -1 | -1 |  |  |
| 90  | 5 | 1 | g5789.t1    | 2 | CORT_0C01880 | 2 | CPAR2_807260 | Zn(2)-C6 fungal-type DNA-binding domain; Transcription factor, fungi                                                                                   | -1 | -1 |  |  |
| 91  | 5 | 3 | g54.t1 g561 | 1 | CORT_0B10510 | 1 | CPAR2_109450 | HAD-like domain; IMP-specific 5-nucleotidase                                                                                                           | 2  | 2  |  |  |
| 92  | 5 | 1 | g1438.t1    | 2 | CORT_0A01170 | 2 | CPAR2_700990 | Sodium/solute symporter                                                                                                                                | -1 | -1 |  |  |
| 93  | 5 | 2 | g4226.t1 g4 | 1 | CORT_0F02910 | 2 | CPAR2_601850 | CPAR2_601940                                                                                                                                           | 0  | 1  |  |  |
| 94  | 5 | 2 | g3481.t1 g3 | 1 | CORT_0D03660 | 2 | CPAR2_203550 | Pleckstrin homology-like domain                                                                                                                        | 0  | 1  |  |  |
| 95  | 5 | 2 | g4030.t1 g5 | 1 | CORT_0B00180 | 2 | CPAR2_500090 | Ribosomal protein S27a; Ubiquitin conserved site; Ubiquitin supergroup; Ribosomal protein, zinc-binding domain; Ubiquitin; Ubiquitin subgroup          | 0  | 1  |  |  |
| 96  | 5 | 1 | g5671.t1    | 2 | CORT_0C03080 | 2 | CPAR2_806050 | Rieske [2Fe-2S] iron-sulphur domain; Ubiquinol-cytochrome c reductase, iron-sulphur subunit; Rieske iron-sulphur protein; HECT; Zinc finger, L         | -1 | -1 |  |  |
| 97  | 5 | 1 | g1877.t1    | 2 | CORT_0C04630 | 2 | CPAR2_405220 | Ribonuclease H2, subunit B; Zinc finger, CHCC-type                                                                                                     | -1 | -1 |  |  |
| 98  | 5 | 1 | g1446.t1    | 2 | CORT_0G01050 | 2 | CPAR2_700890 | Zn(2)-C6 fungal-type DNA-binding domain; Protein of unknown function DUF3468                                                                           | -1 | -1 |  |  |
| 99  | 5 | 2 | g2031.t1 g2 | 1 | CORT_0C01990 | 2 | CPAR2_406780 | RNA polymerase II-associated, Paf1                                                                                                                     | 0  | 1  |  |  |
| 100 | 5 | 3 | g508.t1 g50 | 1 | CORT_0D06520 | 1 | CPAR2_503040 | Short-chain dehydrogenase/reductase, conserved site; Short-chain dehydrogenase/reductase SDR; Glucose/ribitol dehydrogenase; Armadillo-li              | 2  | 2  |  |  |
| 101 | 5 | 1 | g4343.t1    | 2 | CORT_0A06890 | 2 | CPAR2_207540 | Major facilitator superfamily domain, general substrate transporter; Major facilitator superfamily; Major facilitator superfamily domain               | -1 | -1 |  |  |
| 102 | 5 | 2 | g126.t1 g64 | 1 | CORT_0B11040 | 2 | CPAR2_109930 | Glycoside hydrolase, superfamily; Glycosyl hydrolase, family 13, all-beta; Glycoside hydrolase, catalytic domain; Glycosyl hydrolase, family 13,       | 0  | 1  |  |  |
| 103 | 5 | 1 | g580.t1     | 2 | CORT_0E01450 | 2 | CPAR2_401400 | Zinc finger, HIT-type; Lipase, class 3                                                                                                                 | -1 | -1 |  |  |

|     |   |   |             |   |              |   |              |                                                                                                                                                           |    |    |  |  |
|-----|---|---|-------------|---|--------------|---|--------------|-----------------------------------------------------------------------------------------------------------------------------------------------------------|----|----|--|--|
| 104 | 5 | 3 | g4435.t1 g4 | 1 | CORT_0A01550 | 1 | CPAR2_801480 | Major facilitator superfamily domain, general substrate transporter; Major facilitator superfamily; Major facilitator superfamily domain                  | 2  | 2  |  |  |
| 105 | 5 | 1 | g2133.t1    | 2 | CORT_0C07200 | 2 | CPAR2_407860 | RNA recognition motif domain; Nucleotide-binding, alpha-beta plait                                                                                        | -1 | -1 |  |  |
| 106 | 5 | 1 | g950.t1     | 2 | CORT_0H01360 | 2 | CPAR2_301360 | ATPase, P-type, K/Mg/Cd/Cu/Zn/Na/Ca/Na/H-transporter; YrxC-like domain; ATPase, P-type, cytoplasmic domain N; ATPase, P-type cation-tra                   | -1 | -1 |  |  |
| 107 | 5 | 1 | g3830.t1    | 2 | CORT_0B02240 | 2 | CPAR2_502080 | Major facilitator superfamily domain, general substrate transporter; Major facilitator superfamily; Per1-like                                             | -1 | -1 |  |  |
| 108 | 5 | 1 | g3169.t1    | 2 | CORT_0D00450 | 2 | CPAR2_200360 | Translation Initiation factor eIF-4e; Eukaryotic translation initiation factor 4E (eIF-4E), conserved site; Translation Initiation factor eIF-4e-like d   | -1 | -1 |  |  |
| 109 | 5 | 1 | g2777.t1    | 2 | CORT_0A07340 | 2 | CPAR2_208010 | Translation elongation/initiation factor/Ribosomal, beta-barrel; Translation elongation factor EFG/EF2, C-terminal; Translation elongation factor         | -1 | -1 |  |  |
| 110 | 5 | 1 | g4244.t1    | 2 | CORT_0F03030 | 2 | CPAR2_602060 | Zn(2)-C6 fungal-type DNA-binding domain; Aflatoxin biosynthesis regulatory protein                                                                        | -1 | -1 |  |  |
| 111 | 5 | 2 | g4669.t1 g4 | 1 | CORT_0A03600 | 2 | CPAR2_803580 | RNA polymerase, alpha subunit; RNA polymerase, N-terminal; DNA-directed RNA pol I, largest subunit; RNA polymerase Rpb1, domain 4; RNA                    | 0  | 1  |  |  |
| 112 | 5 | 2 | g5505.t1 g5 | 1 | CORT_0B09425 | 2 | CPAR2_108240 | CPAR2_108310                                                                                                                                              | 0  | 1  |  |  |
| 113 | 5 | 1 | g4955.t2    | 1 | CORT_0B03860 | 3 | CPAR2_102610 | Peptidase aspartic, catalytic; Peptidase aspartic; Peptidase aspartic, active site; Peptidase A1                                                          | -2 | 0  |  |  |
| 114 | 5 | 1 | g3814.t1    | 2 | CORT_0B02410 | 2 | CPAR2_502230 | ATPase, AAA-type, core; DNA polymerase III, clamp loader complex, gamma/delta/delta subunit, C-terminal; AAA+ ATPase domain; Stretch-ac                   | -1 | -1 |  |  |
| 115 | 5 | 2 | g5893.t1 g5 | 1 | CORT_0C00800 | 2 | CPAR2_808350 | CPAR2_808370                                                                                                                                              | 0  | 1  |  |  |
| 116 | 5 | 2 | g4611.t1 g4 | 1 | CORT_0A03090 | 2 | CPAR2_802980 | CPAR2_803090                                                                                                                                              | 0  | 1  |  |  |
| 117 | 5 | 1 | g2824.t2    | 2 | CORT_0A06850 | 2 | CPAR2_207500 | Protein kinase, ATP binding site; tRNA delta(2)-isopentenylpyrophosphate transferase; Serine/threonine-protein kinase, active site; Protein kina          | -1 | -1 |  |  |
| 118 | 5 | 1 | g1185.t1    | 2 | CORT_0E05430 | 2 | CPAR2_303290 | Peroxin/Dysferlin domain; Sirtuin family; Sirtuin family, catalytic core domain; Sirtuin family, catalytic core small domain                              | -1 | -1 |  |  |
| 119 | 5 | 1 | g5760.t1    | 2 | CORT_0C02230 | 2 | CPAR2_806930 | Thioredoxin-like fold; Glutathione S-transferase/chloride channel, C-terminal; Glutathione S-transferase, C-terminal; Glutathione S-transferase,          | -1 | -1 |  |  |
| 120 | 5 | 1 | g1463.t1    | 2 | CORT_0G00870 | 2 | CPAR2_700710 | Protein kinase, ATP binding site; Translation protein SH3-like; Serine/threonine-protein kinase, active site; Protein kinase, catalytic domain; Seri      | -1 | -1 |  |  |
| 121 | 5 | 1 | g4895.t2    | 2 | CORT_0B03290 | 2 | CPAR2_101990 | Uncharacterised protein family UPF0041; Zn(2)-C6 fungal-type DNA-binding domain                                                                           | -1 | -1 |  |  |
| 122 | 5 | 1 | g4066.t1    | 2 | CORT_0H02580 | 2 | CPAR2_600210 | DNA polymerase V; Armadillo-type fold; ATPase, F1 complex, epsilon subunit, mitochondrial; Armadillo-like helical                                         | -1 | -1 |  |  |
| 123 | 5 | 1 | g1060.t2    | 2 | CORT_0H00190 | 2 | CPAR2_300130 | Adenosine deaminase/editase; Ferric reductase transmembrane component-like domain; FAD-binding 8; Ferric reductase, NAD binding; Tetra                    | -1 | -1 |  |  |
| 124 | 5 | 1 | g5557.t1    | 2 | CORT_0B09860 | 2 | CPAR2_108140 | Transcription factor TFIIIB; Cyclin-like; Zinc finger, TFIIIB-type; Zinc finger, GATA-type; Transcription factor TFIIIB, cyclin-like domain; Transcriptio | -1 | -1 |  |  |
| 125 | 5 | 1 | g5487.t1    | 2 | CORT_0B09180 | 2 | CPAR2_108000 | Major facilitator superfamily domain, general substrate transporter; N-acetylglutamate synthase, fungal; Hly-III-related; Domain of unknown func          | -1 | -1 |  |  |
| 126 | 5 | 1 | g5223.t1    | 2 | CORT_0B06430 | 2 | CPAR2_105230 | CTLH/CRA C-terminal to LisH motif domain; tRNA (uracil-O(2))-methyltransferase                                                                            | -1 | -1 |  |  |
| 127 | 5 | 1 | g5552.t1    | 2 | CORT_0B09800 | 2 | CPAR2_108710 | HAD-superfamily hydrolase, subfamily IIB; Trehalose-phosphatase; Glycosyl transferase, family 20; HAD-like domain; Translocation protein Sec              | -1 | -1 |  |  |
| 128 | 5 | 1 | g2391.t1    | 2 | CORT_0A11200 | 2 | CPAR2_211860 | AMP deaminase; Adenosine/AMP deaminase domain; Adenosine/AMP deaminase active site                                                                        | -1 | -1 |  |  |
| 129 | 5 | 1 | g5869.t1    | 2 | CORT_0C01050 | 2 | CPAR2_808080 | TATA element modulatory factor 1 DNA binding; TATA element modulatory factor 1 TATA binding                                                               | -1 | -1 |  |  |
| 130 | 5 | 1 | g1305.t1    | 2 | CORT_0E04510 | 2 | CPAR2_302360 | Myb domain; Homeodomain-like; SANT/Myb domain; NAD(P)-binding domain; Tetrahydrofolate dehydrogenase/cyclohydrolase, catalytic domai                      | -1 | -1 |  |  |
| 131 | 5 | 2 | g4935.t1 g4 | 2 | CORT_0B03690 | 1 | CPAR2_102410 | Peptidase A1; Peptidase aspartic; Peptidase aspartic, active site; Peptidase aspartic, catalytic                                                          | 1  | 0  |  |  |
| 132 | 5 | 1 | g2288.t1    | 2 | CORT_0A12220 | 2 | CPAR2_212920 | CPAR2_212925                                                                                                                                              | -1 | -1 |  |  |
| 133 | 5 | 1 | g1665.t1    | 2 | CORT_0G03320 | 2 | CPAR2_703160 | XPA; Histidine biosynthesis; Imidazole glycerol phosphate synthase, subunit H; Aldolase-type TIM barrel; DNA binding domain, putative; Imidaz             | -1 | -1 |  |  |
| 134 | 5 | 1 | g495.t1     | 2 | CORT_0E02290 | 2 | CPAR2_402240 | LUC7-related; F-box domain, cyclin-like                                                                                                                   | -1 | -1 |  |  |
| 135 | 5 | 1 | g3105.t1    | 2 | CORT_0F00340 | 2 | CPAR2_100230 | Cytochrome b, succinate dehydrogenase small subunit, CybS; Ribosomal protein S14                                                                          | -1 | -1 |  |  |
| 136 | 5 | 1 | g3345.t1    | 2 | CORT_0D02240 | 2 | CPAR2_202190 | Ribosomal protein S4, conserved site; Ribosomal protein S4/S9; RNA-binding S4 domain; Modification methylase HemK                                         | -1 | -1 |  |  |
| 137 | 5 | 1 | g1473.t1    | 2 | CORT_0G00750 | 2 | CPAR2_700600 | Zinc finger, C6HC-type; Zinc finger, RING-type; Zinc finger, RING/FYVE/PHD-type; Zinc finger, RING-type, conserved site                                   | -1 | -1 |  |  |
| 138 | 5 | 1 | g4080.t1    | 2 | CORT_0H02440 | 2 | CPAR2_600340 | Domain of unknown function DUF814; CCR4-Not complex component, Not1, C-terminal; CCR4-Not complex, Not1 subunit, domain of unknown                        | -1 | -1 |  |  |
| 139 | 5 | 1 | g2025.t1    | 2 | CORT_0C06120 | 2 | CPAR2_406700 | Sterol O-acyltransferase, ACAT/DAG/ARE types; Protein of unknown function DUF3112; Membrane bound O-acyl transferase, MBOAT                               | -1 | -1 |  |  |
| 140 | 5 | 1 | g5250.t1    | 2 | CORT_0B06730 | 2 | CPAR2_105510 | Single hybrid motif; Biotin carboxylation domain; Allophanate hydrolase subunit 1; Biotin carboxylase, C-terminal; Cyclophilin-like peptidyl-prolyl       | -1 | -1 |  |  |
| 141 | 5 | 1 | g1699.t1    | 2 | CORT_0G02880 | 2 | CPAR2_702770 | WD40/YVTN repeat-like-containing domain; Late secretory pathway protein AVL9; WD40 repeat; WD40-repeat-containing domain                                  | -1 | -1 |  |  |
| 142 | 5 | 1 | g3772.t1    | 2 | CORT_0B02870 | 2 | CPAR2_502680 | Aminoacyl-tRNA synthetase, class 1a, anticodon-binding; Valyl/Leucyl/Isoleucyl-tRNA synthetase, class I, anticodon-binding; Methionyl-tRNA s              | -1 | -1 |  |  |
| 143 | 5 | 1 | g390.t1     | 2 | CORT_0E03290 | 2 | CPAR2_403270 | Thioredoxin-like fold; ER lumen protein retaining receptor; Thioredoxin domain                                                                            | -1 | -1 |  |  |
| 144 | 5 | 1 | g5188.t3    | 2 | CORT_0B06160 | 2 | CPAR2_104960 | Concanavalin A-like lectin/glucanases superfamily; Legume-like lectin; Concanavalin A-like lectin/glucanase, subgroup                                     | -1 | -1 |  |  |
| 145 | 5 | 1 | g1096.t3    | 2 | CORT_0E06390 | 2 | CPAR2_304200 | tRNA-dihydrouridine synthase; Aldolase-type TIM barrel; tRNA-dihydrouridine synthase, conserved site; Bromodomain; Bromodomain, conserv                   | -1 | -1 |  |  |
| 146 | 5 | 1 | g4721.t1    | 2 | CORT_0A04130 | 2 | CPAR2_804100 | Zinc finger, RanBP2-type; ATPase-like, ATP-binding domain; Ribonuclease H-like domain; Signal transduction histidine kinase, core; Branched-              | -1 | -1 |  |  |
| 147 | 5 | 3 | g325.t1 g33 | 1 | CORT_0E03930 | 1 | CPAR2_403920 | Protein of unknown function DUF3445                                                                                                                       | 2  | 2  |  |  |
| 148 | 5 | 1 | g5372.t1    | 2 | CORT_0B08010 | 2 | CPAR2_106780 | Immunoglobulin E-set; RHO protein GDP dissociation inhibitor; Nucleotide-binding, alpha-beta plait; Cleavage stimulation factor subunit 2, hing           | -1 | -1 |  |  |
| 149 | 5 | 1 | g2656.t1    | 2 | CORT_0A08560 | 2 | CPAR2_209270 | HSP20-like chaperone; Alpha crystallin/Hsp20 domain                                                                                                       | -1 | -1 |  |  |
| 150 | 5 | 3 | g3.t1 g3037 | 1 | CORT_0F01030 | 1 | CPAR2_100760 | Tetratricopeptide repeat; Tetratricopeptide-like helical; Tetratricopeptide repeat-containing domain; Tetratricopeptide TPR-1                             | 2  | 2  |  |  |
| 151 | 5 | 1 | g1172.t1    | 2 | CORT_0E05560 | 2 | CPAR2_303420 | Pseudouridine synthase, catalytic domain; Zinc finger, C2H2-type matrin; CMP/dCMP deaminase, zinc-binding; Domain of unknown function D                   | -1 | -1 |  |  |
| 152 | 5 | 2 | g3216.t1 g3 | 1 | CORT_0D01210 | 2 | CPAR2_200890 | CPAR2_201160                                                                                                                                              | 0  | 1  |  |  |
| 153 | 5 | 1 | g3346.t1    | 2 | CORT_0D02260 | 2 | CPAR2_202210 | DNA mismatch repair protein MutS-like, N-terminal; DNA mismatch repair protein MutS, core; DNA mismatch repair protein MutS, connector; D                 | -1 | -1 |  |  |
| 154 | 5 | 1 | g943.t1     | 2 | CORT_0H01440 | 2 | CPAR2_301440 | NmrA-like; NAD(P)-binding domain                                                                                                                          | -1 | -1 |  |  |
| 155 | 5 | 1 | g3593.t1    | 2 | CORT_0D04810 | 2 | CPAR2_204700 | Acyl transferase/acyl hydrolase/lysophospholipase; Acyl transferase; Malonyl-CoA ACP transacylase, ACP-binding; Formate-tetrahydrofolate lig              | -1 | -1 |  |  |

|     |   |   |             |   |              |   |              |                                                                                                                                                    |    |    |  |  |
|-----|---|---|-------------|---|--------------|---|--------------|----------------------------------------------------------------------------------------------------------------------------------------------------|----|----|--|--|
| 156 | 5 | 2 | g2603.t1 g3 | 1 | CORT_0A09090 | 2 | CPAR2_107990 | Acyl-CoA thioesterase                                                                                                                              | 0  | 1  |  |  |
| 157 | 5 | 1 | g1211.t1    | 2 | CORT_0E05160 | 2 | CPAR2_303020 | Ham1-like protein; Domain of unknown function DUF1713, mitochondria                                                                                | -1 | -1 |  |  |
| 158 | 5 | 1 | g5934.t1    | 2 | CORT_0C00450 | 2 | CPAR2_808690 | MIR motif; Glycosyl transferase, family 39; Fe/S cluster insertion protein; Glycosyltransferase 39 like; Fe/S cluster biogenesis                   | -1 | -1 |  |  |
| 159 | 5 | 2 | g3826.t1 g4 | 1 | CORT_0B02300 | 2 | CPAR2_502140 | Glycoside hydrolase, superfamily; Glycoside hydrolase, family 18, catalytic domain; Flocculin type 3 repeat; Glycoside hydrolase, chitinase activ  | 0  | 1  |  |  |
| 160 | 5 | 1 | g5614.t1    | 2 | CORT_0B10530 | 2 | CPAR2_109390 | Short-chain dehydrogenase/reductase SDR; NAD(P)-binding domain; Glucose/ribitol dehydrogenase                                                      | -1 | -1 |  |  |
| 161 | 5 | 1 | g2032.t1    | 2 | CORT_0C01980 | 2 | CPAR2_406790 | NADP-dependent oxidoreductase domain; Aldo/keto reductase, conserved site; Aldo/keto reductase; Aldo/keto reductase subgroup                       | -1 | -1 |  |  |
| 162 | 5 | 1 | g2176.t1    | 2 | CORT_0A13300 | 2 | CPAR2_213980 | Transmembrane receptor, eukaryota; Winged helix-turn-helix transcription repressor DNA-binding; Proteasome component (PCI) domain                  | -1 | -1 |  |  |
| 163 | 5 | 1 | g4707.t1    | 2 | CORT_0A03960 | 2 | CPAR2_803930 | Rossmann-like alpha/beta/alpha sandwich fold; Zinc finger, U1-type; Phosphoadenosine phosphosulphate reductase                                     | -1 | -1 |  |  |
| 164 | 5 | 2 | g583.t1 g58 | 2 | CORT_0E01500 | 1 | CPAR2_401450 | Major facilitator superfamily domain, general substrate transporter; Sugar transporter, conserved site; General substrate transporter; Sugar/inosi | -1 | 0  |  |  |
| 165 | 5 | 1 | g1604.t1    | 2 | CORT_0G03730 | 2 | CPAR2_703550 | Translation elongation factor EF1A/initiation factor IF2gamma, C-terminal; Translation elongation/initiation factor/Ribosomal, beta-barrel; Amida  | -1 | -1 |  |  |
| 166 | 5 | 1 | g2890.t1    | 2 | CORT_0A06080 | 2 | CPAR2_206730 | Mitochondrial carrier domain; Histidine phosphatase superfamily, clade-1; Mitochondrial substrate/solute carrier                                   | -1 | -1 |  |  |
| 167 | 5 | 1 | g763.t1     | 2 | CORT_0D07350 | 2 | CPAR2_503880 | WD40-repeat-containing domain; Major facilitator superfamily domain, general substrate transporter; Quinoprotein amine dehydrogenase, beta         | -1 | -1 |  |  |
| 168 | 5 | 1 | g3693.t1    | 2 | CORT_0D05830 | 2 | CPAR2_205710 | Peptidase cysteine/serine, trypsin-like; Peptidase S64, Ssy5                                                                                       | -1 | -1 |  |  |
| 169 | 5 | 1 | g1711.t2    | 2 | CORT_0G02630 | 2 | CPAR2_702450 | Cyclin-like; DNA glycosylase; Cyclin, N-terminal; HhH-GPD domain; 8-oxoguanine DNA glycosylase, N-terminal; Cyclin, C-terminal; Helix-turn-h       | -1 | -1 |  |  |
| 170 | 5 | 2 | g1540.t1 g3 | 1 | CORT_0D00920 | 2 | CPAR2_200830 | Amino acid permease domain; Amino acid/polyamine transporter I                                                                                     | 0  | 1  |  |  |
| 171 | 5 | 3 | g3111.t2 g3 | 1 | CORT_0F00410 | 1 | CPAR2_100300 | Major facilitator superfamily domain, general substrate transporter; Major facilitator superfamily; Major facilitator superfamily domain           | 2  | 2  |  |  |
| 172 | 5 | 1 | g1085.t1    | 2 | CORT_0E06520 | 2 | CPAR2_304320 | Beta-hexosaminidase subunit alpha/beta; Streptomyces cyclase/dehydrase; Glycoside hydrolase, superfamily; Glycoside hydrolase, catalytic d         | -1 | -1 |  |  |
| 173 | 5 | 3 | g2942.t1 g2 | 1 | CORT_0A05750 | 1 | CPAR2_206400 | Armadillo-type fold; HEAT, type 2; Armadillo-like helical; Importin-beta, N-terminal                                                               | 2  | 2  |  |  |
| 174 | 5 | 1 | g348.t1     | 1 | CORT_0E03950 | 3 | CPAR2_301840 | CPAR2_403940 CPAR2_805910                                                                                                                          | -2 | 0  |  |  |
| 175 | 5 | 1 | g2447.t1    | 2 | CORT_0A10660 | 2 | CPAR2_211320 | Glycoside hydrolase, family 47                                                                                                                     | -1 | -1 |  |  |
| 176 | 5 | 1 | g3202.t3    | 2 | CORT_0D00810 | 2 | CPAR2_200720 | YL1 nuclear, C-terminal; Glucosidase II beta subunit-like                                                                                          | -1 | -1 |  |  |
| 177 | 5 | 2 | g394.t1 g52 | 1 | CORT_0B06750 | 2 | CPAR2_105530 | Sodium/solute symporter; Sodium/solute symporter, subgroup                                                                                         | 0  | 1  |  |  |
| 178 | 5 | 1 | g5035.t1    | 2 | CORT_0B04670 | 2 | CPAR2_103460 | Glycosyl transferase, family 8; WLM; UDP-glucose:Glycoprotein Glucosyltransferase                                                                  | -1 | -1 |  |  |
| 179 | 5 | 1 | g2336.t1    | 2 | CORT_0A11730 | 2 | CPAR2_212410 | Heat shock chaperonin-binding; Tetratricopeptide repeat; Tetratricopeptide-like helical; Tetratricopeptide repeat-containing domain; Tetratricope  | -1 | -1 |  |  |
| 180 | 5 | 1 | g380.t1     | 2 | CORT_0E03390 | 2 | CPAR2_403370 | Pyridine nucleotide-disulphide oxidoreductase, FAD/NAD(P)-binding domain; Domain of unknown function DUF202; SPX, N-terminal; Pyridine n           | -1 | -1 |  |  |
| 181 | 5 | 1 | g4936.t1    | 2 | CORT_0B03680 | 2 | CPAR2_102390 | GPI-Mannosyltransferase II co-activator, Pga1; Endoplasmic reticulum, stress-associated Ramp4                                                      | -1 | -1 |  |  |
| 182 | 5 | 2 | g1341.t1 g1 | 1 | CORT_0G02190 | 2 | CPAR2_600710 | Aldolase-type TIM barrel; NADH:flavin oxidoreductase/NADH oxidase, N-terminal                                                                      | 0  | 1  |  |  |
| 183 | 5 | 1 | g5300.t1    | 2 | CORT_0B07250 | 2 | CPAR2_106020 | INO80 complex, subunit les4; Anticodon-binding; Aminoacyl-tRNA synthetase, class II; Aminoacyl-tRNA synthetase, class II (G/ H/ P/ S), conse       | -1 | -1 |  |  |
| 184 | 5 | 1 | g5131.t2    | 2 | CORT_0B05620 | 2 | CPAR2_104380 | Winged helix-turn-helix transcription repressor DNA-binding; SMAD/FHA domain; Transcription factor, fork head; Forkhead-associated (FHA) d         | -1 | -1 |  |  |
| 185 | 5 | 1 | g3335.t1    | 2 | CORT_0D02130 | 2 | CPAR2_202080 | U6 snRNA-associated Sm-like protein LSm2; p53-like transcription factor, DNA-binding; Ribonucleoprotein LSM domain, eukaryotic/archaea-ty          | -1 | -1 |  |  |
| 186 | 5 | 3 | g4475.t1 g5 | 1 | CORT_0C01070 | 1 | CPAR2_808070 | Epoxide hydrolase-like; Alpha/beta hydrolase fold-1                                                                                                | 2  | 2  |  |  |
| 187 | 5 | 1 | g137.t1     | 2 | CORT_0B10890 | 2 | CPAR2_109810 | Nucleic acid-binding, OB-fold-like; Kelch-type beta propeller; Exosome complex RNA-binding protein 1/RRP40/RRP4; Leucine carboxyl methyltr         | -1 | -1 |  |  |
| 188 | 5 | 2 | g5014.t1 g5 | 1 | CORT_0B04520 | 2 | CPAR2_103310 | Amino acid permease domain; Amino acid/polyamine transporter I                                                                                     | 0  | 1  |  |  |
| 189 | 5 | 1 | g5618.t1    | 2 | CORT_0B10480 | 2 | CPAR2_109420 | IGR protein motif; Succinyl-CoA synthetase-like; NAD(P)-binding domain; Succinyl-CoA ligase, alpha subunit; ATP-citrate lyase/succinyl-CoA li      | -1 | -1 |  |  |
| 190 | 5 | 1 | g4642.t1    | 2 | CORT_0A03410 | 2 | CPAR2_803390 | Ribosomal S11, conserved site; Ribosomal protein S11                                                                                               | -1 | -1 |  |  |
| 191 | 5 | 2 | g3217.t1 g3 | 1 | CORT_0D01200 | 2 | CPAR2_200900 | Carbon-nitrogen hydrolase; Uncharacterised protein family UPF0012, conserved site                                                                  | 0  | 1  |  |  |
| 192 | 5 | 1 | g810.t1     | 2 | CORT_0D06930 | 2 | CPAR2_503460 | Telomerase holoenzyme, Est3 subunit                                                                                                                | -1 | -1 |  |  |
| 193 | 5 | 1 | g5467.t1    | 2 | CORT_0B08960 | 2 | CPAR2_107770 | Small GTPase superfamily, Rab type; Small GTPase superfamily, Ras type; PAP/25A-associated; Small GTPase superfamily, Rho type; Nucleo             | -1 | -1 |  |  |
| 194 | 5 | 1 | g609.t1     | 2 | CORT_0E01200 | 2 | CPAR2_401160 | Density-regulated protein DRP1; Tetratricopeptide-like helical; Translation initiation factor SUI1                                                 | -1 | -1 |  |  |
| 195 | 5 | 1 | g3038.t1    | 2 | CORT_0F00890 | 2 | CPAR2_100790 | Manganese/iron superoxide dismutase, C-terminal; Manganese/iron superoxide dismutase; TIP41-like protein; Manganese/iron superoxide dis            | -1 | -1 |  |  |
| 196 | 5 | 1 | g1990.t1    | 2 | CORT_0C05690 | 2 | CPAR2_406290 | Protein kinase, ATP binding site; SMAD/FHA domain; Calcium/calmodulin-dependent/calcium-dependent protein kinase; Serine/threonine-prote           | -1 | -1 |  |  |
| 197 | 5 | 1 | g5461.t1    | 2 | CORT_0B08890 | 2 | CPAR2_107700 | Dcp1-like decapping; Spt20 family                                                                                                                  | -1 | -1 |  |  |
| 198 | 5 | 1 | g5064.t1    | 1 | CORT_0B04940 | 3 | CPAR2_103740 | NPL4, zinc-binding putative; Polyubiquitin-tagged protein recognition complex, Npl4 component; Nuclear pore localisation protein NPL4; Nuclea      | -2 | 0  |  |  |
| 199 | 5 | 1 | g3510.t1    | 2 | CORT_0D03970 | 2 | CPAR2_203860 | Major facilitator superfamily domain, general substrate transporter; Major facilitator superfamily; Cytochrome P450; Major facilitator superfamily | -1 | -1 |  |  |
| 200 | 5 | 1 | g4034.t1    | 2 | CORT_0B00130 | 2 | CPAR2_500040 | Helicase, superfamily 1/2, ATP-binding domain; Sec63 domain; Helicase, C-terminal; DNA/RNA helicase, DEAD/DEAH box type, N-terminal; Im            | -1 | -1 |  |  |
| 201 | 5 | 1 | g5183.t2    | 2 | CORT_0B06100 | 2 | CPAR2_104900 | MIR motif; Ribose-phosphate diphosphokinase; Phosphoribosyltransferase domain; Phosphoribosyl pyrophosphate synthetase, conserved site;            | -1 | -1 |  |  |
| 202 | 5 | 2 | g2073.t1 g2 | 1 | CORT_0C06600 | 2 | CPAR2_407230 | CPAR2_407280                                                                                                                                       | 0  | 1  |  |  |
| 203 | 5 | 1 | g1599.t1    | 2 | CORT_0G03900 | 2 | CPAR2_703740 | WD40/YVTN repeat-like-containing domain; Isy1-like splicing; WD40 repeat; WD40-repeat-containing domain; NUC153                                    | -1 | -1 |  |  |
| 204 | 5 | 1 | g2194.t1    | 2 | CORT_0A13110 | 2 | CPAR2_213850 | Protein of unknown function DUF3661, vacuolar transmembrane; Protein of unknown function DUF1752, fungi                                            | -1 | -1 |  |  |
| 205 | 5 | 1 | g4967.t2    | 2 | CORT_0B03990 | 2 | CPAR2_102730 | Ankyrin repeat; KIIA, N-terminal/APSES-type HTH, DNA-binding; Ankyrin repeat-containing domain; Transcription regulator HTH, APSES-type            | -1 | -1 |  |  |
| 206 | 5 | 1 | g109.t1     | 2 | CORT_0B08560 | 2 | CPAR2_107360 | 3-oxo-5-alpha-steroid 4-dehydrogenase, C-terminal                                                                                                  | -1 | -1 |  |  |
| 207 | 5 | 1 | g4121.t1    | 2 | CORT_0F01850 | 2 | CPAR2_600790 | Cytochrome d ubiquinol oxidase, 14kDa subunit; HIT-like domain; ATP adenyllyltransferase, C-terminal; ATP adenyllyltransferase                     | -1 | -1 |  |  |

|     |   |   |              |   |              |   |              |                                                                                                                                                   |    |    |  |  |
|-----|---|---|--------------|---|--------------|---|--------------|---------------------------------------------------------------------------------------------------------------------------------------------------|----|----|--|--|
| 208 | 5 | 2 | g570.t1 g57  | 1 | CORT_0E01590 | 2 | CPAR2_401540 | Peptidase M20; Peptidase M20, carboxypeptidase S; ArgE/DapE/ACY1/CPG2/YscS, conserved site; Peptidase M20, dimerisation                           | 0  | 1  |  |  |
| 209 | 5 | 1 | g2068.t1     | 2 | CORT_0C06550 | 2 | CPAR2_407180 | Protein kinase, ATP binding site; WWW/Rsp5/WWP; Histone-lysine N-methyltransferase, SET2, fungi; Protein kinase, catalytic domain; Transcript     | -1 | -1 |  |  |
| 210 | 5 | 1 | g5687.t1     | 2 | CORT_0C02920 | 2 | CPAR2_806210 | Pyridine nucleotide-disulphide oxidoreductase, FAD/NAD(P)-binding domain; Pyridine nucleotide-disulphide oxidoreductase, NAD-binding dom          | -1 | -1 |  |  |
| 211 | 5 | 1 | g623.t1      | 2 | CORT_0E01040 | 2 | CPAR2_401000 | Eukaryotic translation initiation factor 3 subunit 8, N-terminal; tRNA(Ile)-lysine/2-thiocytidine synthase; Uncharacterised protein family UPF002 | -1 | -1 |  |  |
| 212 | 5 | 1 | g5173.t1     | 2 | CORT_0B05980 | 2 | CPAR2_104780 | Phosphoserine aminotransferase, subgroup; Phosphoserine aminotransferase; Pyridoxal phosphate-dependent transferase, major region, subd           | -1 | -1 |  |  |
| 213 | 5 | 1 | g5885.t1     | 2 | CORT_0C00890 | 2 | CPAR2_808250 | CPAR2_808260                                                                                                                                      | -1 | -1 |  |  |
| 214 | 5 | 1 | g73.t1       | 2 | CORT_0B11520 | 2 | CPAR2_110410 | Cystinosin/ERS1p repeat; Gamma-glutamyltranspeptidase                                                                                             | -1 | -1 |  |  |
| 215 | 4 | 1 | g1111.t1     | 2 | CORT_0E06220 | 1 | CPAR2_304040 | Concanavalin A-like lectin/glucanases superfamily; Beta-glucan synthesis-associated, SKN1; Concanavalin A-like lectin/glucanase, subgroup         | 0  | -1 |  |  |
| 216 | 4 | 2 | g4207.t1 g4  | 1 | CORT_0F02660 | 1 | CPAR2_601650 | Endonuclease/exonuclease/phosphatase                                                                                                              | 1  | 1  |  |  |
| 217 | 4 | 2 | g3775.t1 g3  | 1 | CORT_0B02910 | 1 | CPAR2_502650 | GPI mannosyltransferase                                                                                                                           | 1  | 1  |  |  |
| 218 | 4 | 2 | g1023.t1 g1  | 1 | CORT_0H00580 | 1 | CPAR2_300510 | ATP11                                                                                                                                             | 1  | 1  |  |  |
| 219 | 4 | 2 | g226.t1 g22  | 1 | CORT_0A00890 | 1 | CPAR2_800820 | Protein of unknown function DUF726                                                                                                                | 1  | 1  |  |  |
| 220 | 4 | 1 | g5892.t1     | 2 | CORT_0C00820 | 1 | CPAR2_808340 |                                                                                                                                                   | 0  | -1 |  |  |
| 221 | 4 | 2 | g2864.t1 g2  | 1 | CORT_0A06340 | 1 | CPAR2_206980 |                                                                                                                                                   | 1  | 1  |  |  |
| 222 | 4 | 1 | g3241.t1     | 1 | CORT_0D01190 | 2 | CPAR2_200910 | Nuclear pore assembly and biogenesis protein, APQ12                                                                                               | -1 | 0  |  |  |
| 223 | 4 | 2 | g4333.t1 g4  | 1 | CORT_0F03890 | 1 | CPAR2_602920 | Heme A synthase, type 2; Heme A synthase                                                                                                          | 1  | 1  |  |  |
| 224 | 4 | 1 | g4739.t1     | 1 | CORT_0A04320 | 2 | CPAR2_804230 | Alkaline-phosphatase-like, core domain; Alkaline phosphatase-like, alpha/beta/alpha; Alkaline phosphatase; Alkaline phosphatase, active site      | -1 | 0  |  |  |
| 225 | 4 | 2 | g4433.t1 g4  | 1 | CORT_0A01570 | 1 | CPAR2_801500 | Major facilitator superfamily domain, general substrate transporter; Major facilitator superfamily                                                | 1  | 1  |  |  |
| 226 | 4 | 2 | g2000.t1 g4  | 1 | CORT_0F02360 | 1 | CPAR2_601360 | DnaJ homologue, subfamily C, member 28, conserved domain                                                                                          | 1  | 1  |  |  |
| 227 | 4 | 2 | g10.t1 g305  | 1 | CORT_0F00840 | 1 | CPAR2_100720 | Metallophosphoesterase domain                                                                                                                     | 1  | 1  |  |  |
| 228 | 4 | 2 | g1818.t1 g1  | 1 | CORT_0C04090 | 1 | CPAR2_404660 | Sin3 binding protein                                                                                                                              | 1  | 1  |  |  |
| 229 | 4 | 1 | g2661.t1     | 1 | CORT_0A08510 | 2 | CPAR2_209220 | 6-phosphofructo-2-kinase; Fructose-2,6-bisphosphatase                                                                                             | -1 | 0  |  |  |
| 230 | 4 | 2 | g4352.t1 g4  | 1 | CORT_0F04060 | 1 | CPAR2_603090 | SUN                                                                                                                                               | 1  | 1  |  |  |
| 231 | 4 | 2 | g2944.t1 g3  | 1 | CORT_0A05730 | 1 | CPAR2_206380 | Nucleic acid-binding, OB-fold; Nucleic acid-binding, OB-fold-like; Tetratricopeptide repeat-containing domain; RNA-processing protein, HAT heli   | 1  | 1  |  |  |
| 232 | 4 | 2 | g4542.t1 g4  | 1 | CORT_0A02400 | 1 | CPAR2_802350 |                                                                                                                                                   | 1  | 1  |  |  |
| 233 | 4 | 2 | g4885.t1 g4  | 1 | CORT_0B03190 | 1 | CPAR2_101900 | Helicase, C-terminal; SNF2-related; Helicase, superfamily 1/2, ATP-binding domain                                                                 | 1  | 1  |  |  |
| 234 | 4 | 2 | g2501.t1 g2  | 1 | CORT_0A09880 | 1 | CPAR2_210550 | Transcriptional adaptor 2; Zinc finger, ZZ-type; Homeodomain-like; SANT/Myb domain; SWIRM domain; SANT domain                                     | 1  | 1  |  |  |
| 235 | 4 | 1 | g3960.t1     | 2 | CORT_0B00920 | 1 | CPAR2_500770 | Small GTP-binding protein domain; Small GTPase superfamily, Rho type; Small GTPase superfamily, Rab type; Small GTPase superfamily, Ra            | 0  | -1 |  |  |
| 236 | 4 | 1 | g5558.t1     | 1 | CORT_0B09870 | 2 | CPAR2_108150 | Monoxygenase, FAD-binding; Ubiquinone biosynthesis hydroxylase, UbiH/UbiF/VisC/COQ6, conserved site; Ubiquinone biosynthesis hydroxyl             | -1 | 0  |  |  |
| 237 | 4 | 1 | g5043.t1     | 1 | CORT_0E04800 | 2 | CPAR2_100750 | Peptidase aspartic, catalytic; Peptidase aspartic; Peptidase A1                                                                                   | -1 | 0  |  |  |
| 238 | 4 | 2 | g3180.t1 g3  | 1 | CORT_0D00650 | 1 | CPAR2_200570 | Ribosomal RNA large subunit methyltransferase E; Ribosomal RNA methyltransferase FtsJ domain                                                      | 1  | 1  |  |  |
| 239 | 4 | 2 | g2663.t1 g2  | 1 | CORT_0A08490 | 1 | CPAR2_209190 | RmlC-like cupin domain; Acireductone dioxxygenase ARD family; RmlC-like jelly roll fold                                                           | 1  | 1  |  |  |
| 240 | 4 | 1 | g3857.t1     | 1 | CORT_0B01960 | 2 | CPAR2_501800 | Protein of unknown function DUF3112                                                                                                               | -1 | 0  |  |  |
| 241 | 4 | 2 | g5405.t1 g5  | 1 | CORT_0B08330 | 1 | CPAR2_107130 | WD40/YVTN repeat-like-containing domain; WD40 repeat; WD40-repeat-containing domain; BOP1, N-terminal domain; WD40 repeat, conserve               | 1  | 1  |  |  |
| 242 | 4 | 1 | g5147.t1     | 1 | CORT_0B05695 | 2 | CPAR2_104510 | CPAR2_104640                                                                                                                                      | -1 | 0  |  |  |
| 243 | 4 | 1 | g3155.t1     | 2 | CORT_0C05110 | 1 | CPAR2_200220 | Major facilitator superfamily domain, general substrate transporter; Major facilitator superfamily                                                | 0  | -1 |  |  |
| 244 | 4 | 2 | g177.t1 g17  | 1 | CORT_0E03810 | 1 | CPAR2_403800 | Exoribonuclease, phosphorolytic domain 1; Exoribonuclease, phosphorolytic domain 2; Ribosomal protein S5 domain 2-type fold                       | 1  | 1  |  |  |
| 245 | 4 | 2 | g4105.t1 g4  | 1 | CORT_0H02190 | 1 | CPAR2_600610 | CRAL-TRIO domain; CRAL/TRIO, N-terminal domain                                                                                                    | 1  | 1  |  |  |
| 246 | 4 | 2 | g1158.t1 g1  | 1 | CORT_0E05730 | 1 | CPAR2_303580 | Phosphatidylinositol 4-kinase; Phosphatidylinositol Kinase; Armadillo-type fold; Phosphoinositide 3-kinase, accessory (PIK) domain; Phosphatid    | 1  | 1  |  |  |
| 247 | 4 | 1 | g3679.t1     | 1 | CORT_0D05690 | 2 | CPAR2_205560 | Crotonase, core                                                                                                                                   | -1 | 0  |  |  |
| 248 | 4 | 2 | g2140.t1 g2  | 1 | CORT_0C07290 | 1 | CPAR2_407940 | Armadillo-type fold; Domain of unknown function DUF3554; HEAT, type 2; Armadillo-like helical; Proteasome component ECM29/Translational           | 1  | 1  |  |  |
| 249 | 4 | 1 | g2575.t1     | 2 | CORT_0A09400 | 1 | CPAR2_210120 | Ferredoxin reductase-type FAD-binding domain; Ferric reductase transmembrane component-like domain; FAD-binding 8; Ferric reductase, NA           | 0  | -1 |  |  |
| 250 | 4 | 2 | g3606.t1 g3  | 1 | CORT_0D04960 | 1 | CPAR2_204850 | ATPase domain, prokaryote; Kinesin, motor domain                                                                                                  | 1  | 1  |  |  |
| 251 | 4 | 2 | g178.t1 g18  | 1 | CORT_0E03820 | 1 | CPAR2_403810 | Armadillo-type fold; tRNA/rRNA methyltransferase, SpoU                                                                                            | 1  | 1  |  |  |
| 252 | 4 | 2 | g4784.t1 g4  | 1 | CORT_0A04780 | 1 | CPAR2_804770 | Pleckstrin homology-like domain; Pleckstrin homology domain; Oxysterol-binding protein; Oxysterol-binding protein, conserved site; Ankyrin rep    | 1  | 1  |  |  |
| 253 | 4 | 2 | g3370.t1 g3  | 1 | CORT_0D02530 | 1 | CPAR2_202460 |                                                                                                                                                   | 1  | 1  |  |  |
| 254 | 4 | 2 | g5721.t1 g5  | 1 | CORT_0C02620 | 1 | CPAR2_806530 | DNA mismatch repair protein MutS-like, N-terminal; DNA mismatch repair protein MutS, core; DNA mismatch repair protein MutS, connector; D         | 1  | 1  |  |  |
| 255 | 4 | 2 | g3503.t1 g3  | 1 | CORT_0D03830 | 1 | CPAR2_203720 | ATPase, P-type, K/Mg/Cd/Cu/Zn/Na/Ca/Na/H-transporter; ATPase, P-type phosphorylation site; ATPase, P-type, cytoplasmic domain N; ATPas            | 1  | 1  |  |  |
| 256 | 4 | 2 | g2913.t1 g2  | 1 | CORT_0A05880 | 1 | CPAR2_206520 | WD40/YVTN repeat-like-containing domain; Nucleoporin, Nup133/Nup155-like, N-terminal; Nucleoporin, Nup133/Nup155-like, C-terminal                 | 1  | 1  |  |  |
| 257 | 4 | 1 | g5569.t1     | 2 | CORT_0B10010 | 1 | CPAR2_108910 | D-amino-acid oxidase; NAD(P)-binding domain; FAD dependent oxidoreductase                                                                         | 0  | -1 |  |  |
| 258 | 4 | 2 | g30.t1 g31.t | 1 | CORT_0A05670 | 1 | CPAR2_206320 | ATPase, P-type, K/Mg/Cd/Cu/Zn/Na/Ca/Na/H-transporter; ATPase, P-type, cytoplasmic domain N; ATPase, P-type, unknown pump specificity (t           | 1  | 1  |  |  |
| 259 | 4 | 2 | g5641.t1 g5  | 1 | CORT_0E04020 | 1 | CPAR2_301930 | Armadillo-type fold; HEAT, type 2; Armadillo-like helical                                                                                         | 1  | 1  |  |  |

|     |   |   |              |   |              |   |              |                                                                                                                                                        |    |    |  |  |
|-----|---|---|--------------|---|--------------|---|--------------|--------------------------------------------------------------------------------------------------------------------------------------------------------|----|----|--|--|
| 260 | 4 | 1 | g3779.t1     | 2 | CORT_0B02720 | 1 | CPAR2_502520 | Membrane insertase OXA1/ALB3/YidC                                                                                                                      | 0  | -1 |  |  |
| 261 | 4 | 2 | g364.t1 g36  | 1 | CORT_0E03460 | 1 | CPAR2_403550 | Gamma-glutamyltranspeptidase                                                                                                                           | 1  | 1  |  |  |
| 262 | 4 | 2 | g1339.t1 g1  | 1 | CORT_0G02250 | 1 | CPAR2_702100 | Taurine catabolism dioxygenase TauD/TfdA                                                                                                               | 1  | 1  |  |  |
| 263 | 4 | 1 | g1240.t1     | 1 | CORT_0E04930 | 2 | CPAR2_302770 | Steryl acetyl hydrolase; Lipase, GDXG, active site                                                                                                     | -1 | 0  |  |  |
| 264 | 4 | 1 | g1870.t1     | 2 | CORT_0C04550 | 1 | CPAR2_405150 | Proteasome Inhibitor PI31; PI31 proteasome regulator                                                                                                   | 0  | -1 |  |  |
| 265 | 4 | 2 | g2500.t1 g2  | 1 | CORT_0A09870 | 1 | CPAR2_210540 | Ribosomal protein S17e, conserved site; Ribosomal protein S17e                                                                                         | 1  | 1  |  |  |
| 266 | 4 | 2 | g3764.t1 g3  | 1 | CORT_0B02790 | 1 | CPAR2_502750 | Chaperone, tailless complex polypeptide 1; T-complex protein 1, gamma subunit; Chaperonin TCP-1, conserved site; Chaperonin Cpn60/TCP-1                | 1  | 1  |  |  |
| 267 | 4 | 2 | g575.t1 g59  | 1 | CORT_0E01400 | 1 | CPAR2_401350 | Barwin-related endoglucanase; Barwin-like endoglucanase                                                                                                | 1  | 1  |  |  |
| 268 | 4 | 2 | g2865.t1 g2  | 1 | CORT_0A06350 | 1 | CPAR2_206990 | Cytochrome P450, E-class, CYP52; Cytochrome P450, E-class, group II; Cytochrome P450; Cytochrome P450, conserved site                                  | 1  | 1  |  |  |
| 269 | 4 | 2 | g3399.t1 g3  | 1 | CORT_0D02830 | 1 | CPAR2_202750 | Spa2 homology (SHD) of GIT                                                                                                                             | 1  | 1  |  |  |
| 270 | 4 | 2 | g3615.t1 g3  | 1 | CORT_0D05050 | 1 | CPAR2_204940 | Cation efflux protein                                                                                                                                  | 1  | 1  |  |  |
| 271 | 4 | 2 | g5534.t1 g5  | 1 | CORT_0B09630 | 1 | CPAR2_108540 | Phox-associated domain                                                                                                                                 | 1  | 1  |  |  |
| 272 | 4 | 2 | g5651.t1 g5  | 1 | CORT_0C03300 | 1 | CPAR2_805850 | SNF5/SMARCB1/INI1                                                                                                                                      | 1  | 1  |  |  |
| 273 | 4 | 1 | g3339.t1     | 2 | CORT_0D02080 | 1 | CPAR2_202130 | Major facilitator superfamily domain, general substrate transporter; Major facilitator superfamily; Major facilitator superfamily domain               | 0  | -1 |  |  |
| 274 | 4 | 2 | g4913.t1 g4  | 1 | CORT_0B03490 | 1 | CPAR2_102200 | Ribonuclease III domain                                                                                                                                | 1  | 1  |  |  |
| 275 | 4 | 1 | g1017.t1     | 1 | CORT_0H00640 | 2 | CPAR2_300570 | TM1410 hypothetical-related protein; Glycoside hydrolase, superfamily                                                                                  | -1 | 0  |  |  |
| 276 | 4 | 2 | g3759.t1 g3  | 1 | CORT_0F01710 | 1 | CPAR2_502630 | C2 calcium/lipid-binding domain, CaLB; Phosphatidylserine decarboxylase-related; C2 calcium-dependent membrane targeting; Phosphatidylse               | 1  | 1  |  |  |
| 277 | 4 | 1 | g349.t1      | 1 | CORT_0E03940 | 2 | CPAR2_301830 | Acyl-CoA N-acyltransferase; GNAT domain                                                                                                                | -1 | 0  |  |  |
| 278 | 4 | 1 | g1385.t1     | 2 | CORT_0G01730 | 1 | CPAR2_701590 | Peptidase S10, serine carboxypeptidase, active site; Peptidase S10, serine carboxypeptidase                                                            | 0  | -1 |  |  |
| 279 | 4 | 1 | g2009.t1     | 2 | CORT_0C05960 | 1 | CPAR2_406550 | Polyketide synthase, enoylreductase; Alcohol dehydrogenase superfamily, zinc-type; Alcohol dehydrogenase GroES-like; Alcohol dehydrogena               | 0  | -1 |  |  |
| 280 | 4 | 2 | g452.t1 g45  | 1 | CORT_0E02720 | 1 | CPAR2_402660 | Nucleoporin Nup120/160                                                                                                                                 | 1  | 1  |  |  |
| 281 | 4 | 1 | g2443.t1     | 1 | CORT_0A10620 | 2 | CPAR2_211230 | Polyketide synthase, enoylreductase; Alcohol dehydrogenase superfamily, zinc-type; NAD(P)-binding domain; GroES-like; Alcohol dehydrogen               | -1 | 0  |  |  |
| 282 | 4 | 1 | g1625.t1     | 1 | CORT_0G03670 | 2 | CPAR2_703480 | Regulatory subunit Dfp1/Him1, central region; Zinc finger, DBF-type                                                                                    | -1 | 0  |  |  |
| 283 | 4 | 2 | g93.t1 g94.t | 1 | CORT_0B11350 | 1 | CPAR2_110240 | Hid-1                                                                                                                                                  | 1  | 1  |  |  |
| 284 | 4 | 2 | g2542.t1 g2  | 1 | CORT_0A09740 | 1 | CPAR2_210420 | Globin; Globin-like; Globin, structural domain                                                                                                         | 1  | 1  |  |  |
| 285 | 4 | 2 | g4109.t1 g4  | 1 | CORT_0H02160 | 1 | CPAR2_600650 | Peptidase M16, core; Metalloenzyme, LuxS/M16 peptidase-like, metal-binding; Peptidase M16, N-terminal; Peptidase M16, C-terminal                       | 1  | 1  |  |  |
| 286 | 4 | 1 | g320.t1      | 1 | CORT_0A00120 | 2 | CPAR2_100010 | Bul1, N-terminal; Bul1, C-terminal                                                                                                                     | -1 | 0  |  |  |
| 287 | 4 | 2 | g87.t1 g88.t | 1 | CORT_0B11400 | 1 | CPAR2_110290 | Ribosomal protein S3Ae; Ribosomal protein S3Ae, conserved site                                                                                         | 1  | 1  |  |  |
| 288 | 4 | 2 | g3110.t1 g3  | 1 | CORT_0F00290 | 1 | CPAR2_100180 | WD40/YVTN repeat-like-containing domain; WD40-repeat-containing domain; WD40 repeat                                                                    | 1  | 1  |  |  |
| 289 | 4 | 2 | g2763.t1 g5  | 1 | CORT_0B07830 | 1 | CPAR2_106580 | LicD                                                                                                                                                   | 1  | 1  |  |  |
| 290 | 4 | 2 | g3415.t1 g3  | 1 | CORT_0D02990 | 1 | CPAR2_202910 | 5'-3' exoribonuclease 1; Putative 5-3 exonuclease                                                                                                      | 1  | 1  |  |  |
| 291 | 4 | 2 | g4415.t1 g4  | 1 | CORT_0F04650 | 1 | CPAR2_603690 | Na+/H+ exchanger; Cation/H+ exchanger, CPA1 family; Cation/H+ exchanger                                                                                | 1  | 1  |  |  |
| 292 | 4 | 2 | g4544.t1 g4  | 1 | CORT_0A02420 | 1 | CPAR2_802370 | Target SNARE coiled-coil domain                                                                                                                        | 1  | 1  |  |  |
| 293 | 4 | 1 | g5565.t1     | 1 | CORT_0B09950 | 2 | CPAR2_108860 | Major facilitator superfamily domain, general substrate transporter; Major facilitator superfamily; Major facilitator superfamily domain               | -1 | 0  |  |  |
| 294 | 4 | 2 | g3865.t1 g3  | 1 | CORT_0B01870 | 1 | CPAR2_501710 | ABC transporter-like; HEAT, type 2; ABC transporter, conserved site; Armadillo-like helical; Armadillo-type fold; Elongation Factor 3; AAA+ ATP        | 1  | 1  |  |  |
| 295 | 4 | 2 | g3736.t1 g3  | 1 | CORT_0B02930 | 1 | CPAR2_101770 | Pleckstrin homology-like domain                                                                                                                        | 1  | 1  |  |  |
| 296 | 4 | 2 | g595.t1 g59  | 1 | CORT_0E01350 | 1 | CPAR2_401300 | Acyltransferase ChoActase/COT/CPT                                                                                                                      | 1  | 1  |  |  |
| 297 | 4 | 2 | g3234.t1 g3  | 1 | CORT_0D01020 | 1 | CPAR2_200970 | Major facilitator superfamily domain, general substrate transporter; Major facilitator superfamily; Tetracycline resistance protein TetB/drug resist   | 1  | 1  |  |  |
| 298 | 4 | 1 | g2035.t1     | 1 | CORT_0C06210 | 2 | CPAR2_406800 | Peptidase S8, subtilisin, Ser-active site; Peptidase S8/S53, subtilisin/kexin/sedolisin; Proteinase inhibitor, propeptide; Peptidase S8, subtilisin, H | -1 | 0  |  |  |
| 299 | 4 | 2 | g1539.t1 g3  | 1 | CORT_0A00130 | 1 | CPAR2_800020 | Thiolase, conserved site; Thiolase-like, subgroup; Thiolase, active site; Thiolase-like; Thiolase, C-terminal; Thiolase; Thiolase, N-terminal; Thiol   | 1  | 1  |  |  |
| 300 | 4 | 2 | g3098.t1 g3  | 1 | CORT_0F00430 | 1 | CPAR2_100330 | Major facilitator superfamily domain, general substrate transporter; Major facilitator superfamily                                                     | 1  | 1  |  |  |
| 301 | 4 | 2 | g2936.t1 g2  | 1 | CORT_0A05790 | 1 | CPAR2_206430 | Ribosomal protein S35, mitochondrial                                                                                                                   | 1  | 1  |  |  |
| 302 | 4 | 1 | g1442.t1     | 1 | CORT_0G01100 | 2 | CPAR2_700940 | Alternative oxidase                                                                                                                                    | -1 | 0  |  |  |
| 303 | 4 | 1 | g4225.t1     | 1 | CORT_0F02920 | 2 | CPAR2_601840 | Polyketide synthase, enoylreductase; Alcohol dehydrogenase superfamily, zinc-type; GroES-like; Alcohol dehydrogenase GroES-like; Alcohol d             | -1 | 0  |  |  |
| 304 | 4 | 2 | g2498.t1 g4  | 1 | CORT_0A09850 | 1 | CPAR2_210520 | RNA-processing protein, HAT helix; Tetratricopeptide-like helical; U3 small nucleolar RNA-associated protein 6                                         | 1  | 1  |  |  |
| 305 | 4 | 2 | g550.t1 g55  | 1 | CORT_0E01790 | 1 | CPAR2_401740 | Ferredoxin reductase-type FAD-binding domain; Riboflavin synthase-like beta-barrel; Ferric reductase transmembrane component-like domain;              | 1  | 1  |  |  |
| 306 | 4 | 2 | g4312.t1 g4  | 1 | CORT_0F03710 | 1 | CPAR2_602730 | Peptidase aspartic, catalytic; Peptidase aspartic; Peptidase aspartic, active site; Peptidase A1                                                       | 1  | 1  |  |  |
| 307 | 4 | 2 | g5103.t1 g5  | 1 | CORT_0B05330 | 1 | CPAR2_104120 | WD40/YVTN repeat-like-containing domain; WD40 repeat; Histone-binding protein RBBP4; WD40-repeat-containing domain                                     | 1  | 1  |  |  |
| 308 | 4 | 2 | g3371.t1 g3  | 1 | CORT_0D02540 | 1 | CPAR2_202470 | Tetratricopeptide-like helical                                                                                                                         | 1  | 1  |  |  |
| 309 | 4 | 2 | g2977.t1 g2  | 1 | CORT_0F01600 | 1 | CPAR2_101510 |                                                                                                                                                        | 1  | 1  |  |  |
| 310 | 4 | 2 | g3307.t1 g3  | 1 | CORT_0D01860 | 1 | CPAR2_201800 | Bul1, N-terminal; Bul1, C-terminal                                                                                                                     | 1  | 1  |  |  |
| 311 | 4 | 1 | g4929.t1     | 2 | CORT_0A13080 | 1 | CPAR2_809010 |                                                                                                                                                        | 0  | -1 |  |  |

|     |   |   |             |   |              |   |              |                                                                                                                                                  |    |    |  |  |
|-----|---|---|-------------|---|--------------|---|--------------|--------------------------------------------------------------------------------------------------------------------------------------------------|----|----|--|--|
| 312 | 4 | 2 | g5369.t1 g5 | 1 | CORT_0B07990 | 1 | CPAR2_106760 | Cysteine synthase/cystathionine beta-synthase P-phosphate-binding site; Cystathionine beta-synthase, core; Cystathionine beta-synthase; Tryp     | 1  | 1  |  |  |
| 313 | 4 | 1 | g1621.t1    | 1 | CORT_0G03880 | 2 | CPAR2_703670 | Metallophosphoesterase domain                                                                                                                    | -1 | 0  |  |  |
| 314 | 4 | 2 | g2689.t1 g2 | 1 | CORT_0A08250 | 1 | CPAR2_208980 | Six-hairpin glycosidase; Six-hairpin glycosidase-like; Glycoside hydrolase, family 65, N-terminal; Glycoside hydrolase-type carbohydrate-binding | 1  | 1  |  |  |
| 315 | 4 | 2 | g1247.t1 g1 | 1 | CORT_0E04830 | 1 | CPAR2_302650 | Acyl transferase/acyl hydrolase/lysophospholipase; Acyl transferase; Fatty acid synthase; Domain of unknown function DUF1729; Fatty acid sy      | 1  | 1  |  |  |
| 316 | 4 | 2 | g3034.t1 g6 | 1 | CORT_0F01050 | 1 | CPAR2_100970 | HAD-like domain; Pyrimidine 5-nucleotidase                                                                                                       | 1  | 1  |  |  |
| 317 | 4 | 1 | g5837.t1    | 2 | CORT_0C01380 | 1 | CPAR2_807750 |                                                                                                                                                  | 0  | -1 |  |  |
| 318 | 4 | 2 | g1030.t1 g1 | 1 | CORT_0H00520 | 1 | CPAR2_300450 | Folypolyglutamate synthetase, conserved site; Mur ligase, C-terminal; Folypolyglutamate synthetase; Mur ligase, central                          | 1  | 1  |  |  |
| 319 | 4 | 1 | g2515.t1    | 2 | CORT_0A09980 | 1 | CPAR2_210650 | Phospholipid/glycerol acyltransferase                                                                                                            | 0  | -1 |  |  |
| 320 | 4 | 2 | g20.t1 g422 | 1 | CORT_0F02890 | 1 | CPAR2_601925 |                                                                                                                                                  | 1  | 1  |  |  |
| 321 | 4 | 2 | g1345.t1 g1 | 1 | CORT_0G02170 | 1 | CPAR2_702040 | Peptidase aspartic, catalytic; Peptidase aspartic; Peptidase A1                                                                                  | 1  | 1  |  |  |
| 322 | 4 | 2 | g554.t1 g55 | 1 | CORT_0E01750 | 1 | CPAR2_401700 | Alpha/gamma-adaptin-binding protein p34                                                                                                          | 1  | 1  |  |  |
| 323 | 4 | 2 | g1119.t1 g2 | 1 | CORT_0A12880 | 1 | CPAR2_213550 | Arginine-tRNA-protein transferase, C-terminal; Acyl-CoA N-acyltransferase; Arginine-tRNA-protein transferase 1, eukaryotic; Arginine-tRNA-prot   | 1  | 1  |  |  |
| 324 | 4 | 2 | g2226.t1 g2 | 1 | CORT_0A12810 | 1 | CPAR2_213500 | Zinc finger, RING-type; Zinc finger, RING/FYVE/PHD-type; Zinc finger, CCCH-type                                                                  | 1  | 1  |  |  |
| 325 | 4 | 1 | g2660.t1    | 1 | CORT_0A08520 | 2 | CPAR2_209230 | Heat shock protein DnaJ, N-terminal                                                                                                              | -1 | 0  |  |  |
| 326 | 4 | 2 | g4545.t1 g4 | 1 | CORT_0A02430 | 1 | CPAR2_802380 | GRIP                                                                                                                                             | 1  | 1  |  |  |
| 327 | 4 | 2 | g1386.t1 g3 | 1 | CORT_0D04740 | 1 | CPAR2_204630 | CheY-like superfamily; Signal transduction response regulator, receiver domain                                                                   | 1  | 1  |  |  |
| 328 | 4 | 2 | g3744.t1 g5 | 1 | CORT_0B03010 | 1 | CPAR2_101690 | ATPase, AAA-type, core; AAA+ ATPase domain; ATPase, AAA-type, conserved site                                                                     | 1  | 1  |  |  |
| 329 | 4 | 2 | g2693.t1 g2 | 1 | CORT_0A08220 | 1 | CPAR2_208950 |                                                                                                                                                  | 1  | 1  |  |  |
| 330 | 4 | 1 | g3750.t1    | 1 | CORT_0A05590 | 2 | CPAR2_101630 | Uracil-DNA glycosylase-like; DNA glycosylase, G/T mismatch                                                                                       | -1 | 0  |  |  |
| 331 | 4 | 2 | g1115.t1 g1 | 1 | CORT_0E06190 | 1 | CPAR2_304010 | Ras GTPase-activating protein; C2 membrane targeting protein; C2 calcium/lipid-binding domain, CaLB; Ras GTPase-activating protein, conser       | 1  | 1  |  |  |
| 332 | 4 | 2 | g4519.t1 g4 | 1 | CORT_0A02190 | 1 | CPAR2_802140 | GTP binding domain; GTP-binding protein, orthogonal bundle domain                                                                                | 1  | 1  |  |  |
| 333 | 4 | 2 | g1831.t1 g1 | 1 | CORT_0C04180 | 1 | CPAR2_404740 |                                                                                                                                                  | 1  | 1  |  |  |
| 334 | 4 | 2 | g5636.t1 g5 | 1 | CORT_0E04060 | 1 | CPAR2_301970 | Inositol-pentakisphosphate 2-kinase                                                                                                              | 1  | 1  |  |  |
| 335 | 4 | 2 | g460.t1 g46 | 1 | CORT_0E02640 | 1 | CPAR2_402580 | ATPase domain, prokaryote                                                                                                                        | 1  | 1  |  |  |
| 336 | 4 | 1 | g5003.t2    | 1 | CORT_0B04390 | 2 | CPAR2_103160 | ABC transporter, transmembrane domain; ABC transporter-like; ABC transporter, conserved site; ABC transporter, integral membrane type 1; A       | -1 | 0  |  |  |
| 337 | 4 | 1 | g4411.t1    | 2 | CORT_0F04600 | 1 | CPAR2_603630 | Like-Sm (LSM) domain; Rad52/22 double-strand break repair protein; Ribonucleoprotein LSM domain, eukaryotic/archaea-type; Ribonucleoprot         | 0  | -1 |  |  |
| 338 | 4 | 1 | g4700.t1    | 2 | CORT_0A03880 | 1 | CPAR2_803860 | Src homology-3 domain; Phox homologous domain                                                                                                    | 0  | -1 |  |  |
| 339 | 4 | 2 | g3035.t1 g5 | 1 | CORT_0F01040 | 1 | CPAR2_100960 |                                                                                                                                                  | 1  | 1  |  |  |
| 340 | 4 | 2 | g4635.t1 g4 | 1 | CORT_0A03260 | 1 | CPAR2_803210 | Armadillo-type fold                                                                                                                              | 1  | 1  |  |  |
| 341 | 4 | 2 | g3055.t1 g8 | 1 | CORT_0F00860 | 1 | CPAR2_100740 | Cyclin, N-terminal; Cyclin-like; Cyclin PHO80-like                                                                                               | 1  | 1  |  |  |
| 342 | 4 | 2 | g5127.t2 g5 | 1 | CORT_0B05580 | 1 | CPAR2_104340 | Zinc finger, PHD-type; Zinc finger, RING-type; Zinc finger, FYVE/PHD-type; Zinc finger, RING/FYVE/PHD-type; Zinc finger, PHD-finger; Zinc fin    | 1  | 1  |  |  |
| 343 | 4 | 2 | g4521.t1 g4 | 1 | CORT_0A02200 | 1 | CPAR2_802150 | Chromatin associated protein KTI12                                                                                                               | 1  | 1  |  |  |
| 344 | 4 | 1 | g5822.t1    | 2 | CORT_0C01510 | 1 | CPAR2_807620 | FAR-17a/AIG1-like protein                                                                                                                        | 0  | -1 |  |  |
| 345 | 4 | 2 | g4434.t1 g4 | 1 | CORT_0A01560 | 1 | CPAR2_801490 | Major facilitator superfamily domain, general substrate transporter; Major facilitator superfamily                                               | 1  | 1  |  |  |
| 346 | 4 | 2 | g5049.t1 g5 | 1 | CORT_0B04810 | 1 | CPAR2_103610 | Drug/metabolite transporter                                                                                                                      | 1  | 1  |  |  |
| 347 | 4 | 1 | g4591.t1    | 1 | CORT_0A02810 | 2 | CPAR2_100860 | WD40-repeat-containing domain; F-box domain, cyclin-like; WD40 repeat, conserved site; WD40/YVTN repeat-like-containing domain; G-protei         | -1 | 0  |  |  |
| 348 | 4 | 1 | g5150.t1    | 1 | CORT_0B05760 | 2 | CPAR2_104540 | NAD(P)-binding domain; NAD-dependent epimerase/dehydratase                                                                                       | -1 | 0  |  |  |
| 349 | 4 | 1 | g2525.t1    | 2 | CORT_0A10050 | 1 | CPAR2_210750 | Major facilitator superfamily domain, general substrate transporter; Major facilitator superfamily; Major facilitator superfamily domain         | 0  | -1 |  |  |
| 350 | 4 | 2 | g2502.t1 g2 | 1 | CORT_0A09890 | 1 | CPAR2_210560 |                                                                                                                                                  | 1  | 1  |  |  |
| 351 | 4 | 1 | g4934.t1    | 1 | CORT_0B03820 | 2 | CPAR2_102420 | Peptidase A1; Peptidase aspartic; Peptidase aspartic, active site; Peptidase aspartic, catalytic                                                 | -1 | 0  |  |  |
| 352 | 4 | 2 | g5134.t1 g5 | 1 | CORT_0B05650 | 1 | CPAR2_104420 | Guanine-nucleotide dissociation stimulator CDC25; Ras guanine nucleotide exchange factor, domain; Ras guanine-nucleotide exchange factor,        | 1  | 1  |  |  |
| 353 | 4 | 1 | g668.t1     | 1 | CORT_0E00580 | 2 | CPAR2_400430 | Clathrin light chain                                                                                                                             | -1 | 0  |  |  |
| 354 | 4 | 2 | g2388.t1 g2 | 1 | CORT_0A11230 | 1 | CPAR2_211890 | Domain of unknown function DUF1720; WH2 domain; Actin cytoskeleton-regulatory complex protein PAN1; EF-hand-like domain; EPS15 homol             | 1  | 1  |  |  |
| 355 | 4 | 2 | g4902.t1 g4 | 1 | CORT_0B03390 | 1 | CPAR2_102080 | Fatty acid/sphingolipid desaturase; Cytochrome b5; Fatty acid desaturase, type 1                                                                 | 1  | 1  |  |  |
| 356 | 4 | 2 | g1744.t1 g1 | 1 | CORT_0G02440 | 1 | CPAR2_702250 | CheY-like superfamily; AGC-kinase, C-terminal; Signal transduction response regulator, receiver domain; Serine/threonine-protein kinase, activ   | 1  | 1  |  |  |
| 357 | 4 | 2 | g2908.t1 g2 | 1 | CORT_0A05980 | 1 | CPAR2_206630 | Alcohol dehydrogenase superfamily, zinc-type; Alcohol dehydrogenase, C-terminal; NAD(P)-binding domain; GroES-like                               | 1  | 1  |  |  |
| 358 | 4 | 1 | g2940.t1    | 1 | CORT_0A05760 | 2 | CPAR2_206500 | Protein of unknown function DUF3445                                                                                                              | -1 | 0  |  |  |
| 359 | 4 | 1 | g685.t1     | 1 | CORT_0E00440 | 2 | CPAR2_400270 | Zinc finger, HIT-type                                                                                                                            | -1 | 0  |  |  |
| 360 | 4 | 1 | g1090.t1    | 1 | CORT_0E06470 | 2 | CPAR2_100480 | NAD(P)-binding domain; NAD-dependent epimerase/dehydratase                                                                                       | -1 | 0  |  |  |
| 361 | 4 | 2 | g5682.t1 g5 | 1 | CORT_0C02970 | 1 | CPAR2_806170 | Zinc finger, DNA-directed DNA polymerase, family B, alpha; DNA-directed DNA polymerase, family B, exonuclease domain; DNA polymerase, p          | 1  | 1  |  |  |
| 362 | 4 | 2 | g27.t1 g311 | 1 | CORT_0F00130 | 1 | CPAR2_100030 | BAR domain; Src homology-3 domain                                                                                                                | 1  | 1  |  |  |
| 363 | 4 | 2 | g2675.t1 g2 | 1 | CORT_0A08380 | 1 | CPAR2_209100 |                                                                                                                                                  | 1  | 1  |  |  |

|     |    |   |              |   |              |              |              |                                                                                                                                                  |    |    |  |  |
|-----|----|---|--------------|---|--------------|--------------|--------------|--------------------------------------------------------------------------------------------------------------------------------------------------|----|----|--|--|
| 364 | 4  | 2 | g3124.t1 g4  | 1 | CORT_0F00220 | 1            | CPAR2_100110 | Glycoside hydrolase, superfamily; Glucanosyltransferase; Glycoside hydrolase, catalytic domain                                                   | 1  | 1  |  |  |
| 365 | 4  | 1 | g1752.t1     | 1 | CORT_0C03500 | 2            | CPAR2_404060 | Cell wall beta-glucan synthesis; Yeast cell wall synthesis KRE9/KNH1                                                                             | -1 | 0  |  |  |
| 366 | 4  | 2 | g4756.t1 g4  | 1 | CORT_0A04510 | 1            | CPAR2_804520 | 6-phosphogluconate dehydrogenase, C-terminal-like; Ketopantoate reductase ApbA/PanE, C-terminal; Dehydrogenase, multihelical                     | 1  | 1  |  |  |
| 367 | 4  | 1 | g5232.t1     | 2 | CORT_0B06470 | 1            | CPAR2_105310 | Peptidyl-prolyl cis-trans isomerase, PpiC-type; WWW/Rsp5/WWP                                                                                     | 0  | -1 |  |  |
| 368 | 4  | 2 | g4296.t1 g4  | 1 | CORT_0F03540 | 1            | CPAR2_602570 | FMP27, GFWDK domain; FMP27, SW domain; FMP27, domain of unknown function DUF2405; FMP27, N-terminal; FMP27, WPPW domain; F                       | 1  | 1  |  |  |
| 369 | 4  | 2 | g75.t1 g77.t | 1 | CORT_0B11500 | 1            | CPAR2_110390 | Domain of unknown function DUF1708                                                                                                               | 1  | 1  |  |  |
| 370 | 4  | 2 | g4672.t1 g4  | 1 | CORT_0A03630 | 1            | CPAR2_803610 |                                                                                                                                                  | 1  | 1  |  |  |
| 371 | 4  | 2 | g1631.t1 g1  | 1 | CORT_0G03620 | 1            | CPAR2_703450 | Domain of unknown function DUF1212; Domain of unknown function DUF3815                                                                           | 1  | 1  |  |  |
| 372 | 4  | 2 | g5888.t1 g5  | 1 | CORT_0C00860 | 1            | CPAR2_808290 | GTP binding domain                                                                                                                               | 1  | 1  |  |  |
| 373 | 4  | 2 | g5126.t1 g5  | 1 | CORT_0B05570 | 1            | CPAR2_104330 | Actin-binding, cofilin/tropomyosin type                                                                                                          | 1  | 1  |  |  |
| 374 | 4  | 1 | g5498.t1     | 1 | CORT_0B09310 | 2            | CPAR2_108170 | Ribonuclease P, Rpm2, mitochondrial                                                                                                              | -1 | 0  |  |  |
| 375 | 4  | 1 | g3907.t1     | 1 | CORT_0B01440 | 2            | CPAR2_501280 | Zn(2)-C6 fungal-type DNA-binding domain                                                                                                          | -1 | 0  |  |  |
| 376 | 4  | 2 | g2072.t1 g2  | 1 | CORT_0C06590 | 1            | CPAR2_407220 | Oxoglutarate/iron-dependent dioxygenase; Non-haem dioxygenase N-terminal domain                                                                  | 1  | 1  |  |  |
| 377 | 4  | 2 | g2383.t1 g2  | 1 | CORT_0A11270 | 1            | CPAR2_211930 | Zinc finger, FYVE/PHD-type; Chaperonin Cpn60/TCP-1; Zinc finger, RING/FYVE/PHD-type; Zinc finger, FYVE-type; Phosphatidylinositol-4-pho          | 1  | 1  |  |  |
| 378 | 4  | 1 | g3884.t1     | 1 | CORT_0A07490 | 2            | CPAR2_208160 | Phosphate permease; Major facilitator superfamily domain, general substrate transporter; General substrate transporter; Major facilitator superf | -1 | 0  |  |  |
| 379 | 4  | 2 | g3426.t1 g3  | 1 | CORT_0D03090 | 1            | CPAR2_203010 | Kinesin, motor domain; Kinesin, motor region, conserved site                                                                                     | 1  | 1  |  |  |
| 380 | 4  | 2 | g4165.t1 g4  | 1 | CORT_0F02270 | 1            | CPAR2_601270 |                                                                                                                                                  | 1  | 1  |  |  |
| 381 | 4  | 2 | g4276.t1 g4  | 1 | CORT_0F03370 | 1            | CPAR2_602390 | Aldolase-type TIM barrel; NADH:flavin oxidoreductase/NADH oxidase, N-terminal                                                                    | 1  | 1  |  |  |
| 382 | 4  | 2 | g236.t1 g23  | 1 | CORT_0A00980 | 1            | CPAR2_800910 |                                                                                                                                                  | 1  | 1  |  |  |
| 383 | 4  | 2 | g4386.t1 g4  | 1 | CORT_0F04370 | 1            | CPAR2_603410 |                                                                                                                                                  | 1  | 1  |  |  |
| 384 | 4  | 2 | g2347.t1 g2  | 1 | CORT_0A11620 | 1            | CPAR2_212290 | Exportin/Importin, Cse1-like; Armadillo-type fold; Armadillo-like helical; Importin-beta, N-terminal                                             | 1  | 1  |  |  |
| 385 | 4  | 1 | g4838.t1     | 1 | CORT_0A05290 | 2            | CPAR2_301640 | Major facilitator superfamily domain, general substrate transporter; Major facilitator superfamily; Major facilitator superfamily domain         | -1 | 0  |  |  |
| 386 | 4  | 2 | g2984.t1 g2  | 1 | CORT_0F01460 | 1            | CPAR2_101370 | Rab-GTPase-TBC domain                                                                                                                            | 1  | 1  |  |  |
| 387 | 4  | 2 | g4543.t1 g4  | 1 | CORT_0A02410 | 1            | CPAR2_802360 | Vacuolar protein sorting 55                                                                                                                      | 1  | 1  |  |  |
| 388 | 4  | 2 | g2420.t1 g2  | 1 | CORT_0A10920 | 1            | CPAR2_211580 | Mitochondrial distribution and morphology family 33, fungi                                                                                       | 1  | 1  |  |  |
| 389 | 4  | 2 | g1950.t1 g1  | 1 | CORT_0C05390 | 1            | CPAR2_405990 |                                                                                                                                                  | 1  | 1  |  |  |
| 390 | 4  | 1 | g5497.t1     | 1 | CORT_0B09300 | 2            | CPAR2_108130 | WD40/YVTN repeat-like-containing domain; Ubiquitin interacting motif; Quinonprotein alcohol dehydrogenase-like; WD40-repeat-containing do        | -1 | 0  |  |  |
| 391 | 4  | 2 | g5040.t1 g5  | 1 | CORT_0B04750 | 1            | CPAR2_103540 |                                                                                                                                                  | 1  | 1  |  |  |
| 392 | 4  | 2 | g3272.t1 g3  | 1 | CORT_0D01490 | 1            | CPAR2_201440 | Major facilitator superfamily domain, general substrate transporter; Major facilitator superfamily; Major facilitator superfamily domain         | 1  | 1  |  |  |
| 393 | 4  | 2 | g2002.t1 g2  | 1 | CORT_0C05580 | 1            | CPAR2_406180 | Aldehyde dehydrogenase, N-terminal; Aldehyde dehydrogenase, conserved site; Aldehyde/histidinol dehydrogenase; Aldehyde dehydrogenase            | 1  | 1  |  |  |
| 394 | 4  | 2 | g1833.t1 g5  | 1 | CORT_0C01970 | 1            | CPAR2_807180 | Flavin monooxygenase-like; NAD(P)-binding domain                                                                                                 | 1  | 1  |  |  |
| 395 | 4  | 2 | g3899.t1 g3  | 1 | CORT_0B01530 | 1            | CPAR2_501390 | Tryptophan synthase beta chain/beta chain-like; Tryptophan synthase, alpha chain, active site; Aldolase-type TIM barrel; Tryptophan synthase,    | 1  | 1  |  |  |
| 396 | 4  | 2 | g4531.t1 g4  | 1 | CORT_0A02290 | 1            | CPAR2_802240 | Major facilitator superfamily domain, general substrate transporter; Major facilitator superfamily; Major facilitator superfamily domain         | 1  | 1  |  |  |
| 397 | 4  | 1 | g5504.t1     | 1 | CORT_0B09370 | 2            | CPAR2_108230 | Rhodopsin, archaeal/bacterial/fungal                                                                                                             | -1 | 0  |  |  |
| 398 | 4  | 1 | g2799.t1     | 2 | CORT_0A07110 | 1            | CPAR2_207760 | LicD                                                                                                                                             | 0  | -1 |  |  |
| 399 | 4  | 2 | g2270.t1 g2  | 1 | CORT_0A12410 | 1            | CPAR2_213100 | Zinc finger, C2H2                                                                                                                                | 1  | 1  |  |  |
| 400 | 4  | 2 | g2499.t1 g2  | 1 | CORT_0A09860 | 1            | CPAR2_210530 |                                                                                                                                                  | 1  | 1  |  |  |
| 401 | 10 | 9 | g1775.t1 g2  | 1 | CORT_0B02750 |              |              |                                                                                                                                                  | 9  | 8  |  |  |
| 402 | 5  | 3 | g5971.t1 g8  | 2 | CORT_0D06960 | CORT_0E04360 |              |                                                                                                                                                  | 3  | 1  |  |  |
| 403 | 3  | 2 | g2225.t1 g2  | 1 | CORT_0A12820 |              |              |                                                                                                                                                  | 2  | 1  |  |  |
| 404 | 3  | 2 | g4427.t1 g7  | 1 | CORT_0F04750 |              |              |                                                                                                                                                  | 2  | 1  |  |  |
| 405 | 3  | 1 | g1344.t1     | 2 | CORT_0F00880 | CORT_0G02030 |              | Peptidase aspartic, catalytic; Peptidase aspartic; Peptidase A1                                                                                  | 1  | -1 |  |  |
| 406 | 3  | 2 | g3999.t1 g6  | 1 | CORT_0B00510 |              |              | Leucine-rich repeat                                                                                                                              | 2  | 1  |  |  |
| 407 | 2  | 1 | g2342.t1     | 1 | CORT_0A11670 |              |              | CENP-A-nucleosome distal centromere subunit CENP-Q                                                                                               | 1  | 0  |  |  |
| 408 | 2  | 1 | g1215.t1     | 1 | CORT_0E05130 |              |              |                                                                                                                                                  | 1  | 0  |  |  |
| 409 | 2  | 1 | g1236.t1     | 1 | CORT_0E04900 |              |              | Steryl acetyl hydrolase                                                                                                                          | 1  | 0  |  |  |
| 410 | 2  | 1 | g2962.t1     | 1 | CORT_0F01800 |              |              |                                                                                                                                                  | 1  | 0  |  |  |
| 411 | 2  | 1 | g2951.t1     | 1 | CORT_0A05640 |              |              |                                                                                                                                                  | 1  | 0  |  |  |
| 412 | 2  | 1 | g2916.t1     | 1 | CORT_0A05900 |              |              |                                                                                                                                                  | 1  | 0  |  |  |
| 413 | 2  | 1 | g1866.t1     | 1 | CORT_0C04515 |              |              |                                                                                                                                                  | 1  | 0  |  |  |
| 414 | 2  | 1 | g1257.t1     | 1 | CORT_0E04740 |              |              | Bacterial transferase hexapeptide repeat; Trimeric LpxA-like; Hexapeptide transferase, conserved site                                            | 1  | 0  |  |  |
| 415 | 2  | 1 | g3731.t1     | 1 | CORT_0D06210 |              |              | Chromosome segregation protein Spc25                                                                                                             | 1  | 0  |  |  |



|     |   |   |                                   |   |                |              |  |                                                                                                                                                   |  |    |   |  |  |
|-----|---|---|-----------------------------------|---|----------------|--------------|--|---------------------------------------------------------------------------------------------------------------------------------------------------|--|----|---|--|--|
| 416 | 2 | 1 | g4559.t1                          | 1 | CORT_0A02500   |              |  |                                                                                                                                                   |  | 1  | 0 |  |  |
| 417 | 2 | 1 | g4912.t1                          | 1 | CORT_0B03480   |              |  | Nucleolar protein Dnt1-like, N-terminal                                                                                                           |  | 1  | 0 |  |  |
| 418 | 2 | 1 | g5908.t1                          | 1 | CORT_0G04050   |              |  | F-box domain, cyclin-like                                                                                                                         |  | 1  | 0 |  |  |
| 419 | 2 | 1 | g4175.t1                          | 1 | CORT_0E04090   |              |  | F-box domain, cyclin-like                                                                                                                         |  | 1  | 0 |  |  |
| 420 | 2 | 1 | g2022.t1                          | 1 | CORT_0C06090   |              |  | Leucine-rich repeat; Leucine-rich repeat, typical subtype; Leucine rich repeat 4                                                                  |  | 1  | 0 |  |  |
| 421 | 2 | 1 | g3930.t1                          | 1 | CORT_0B01240   |              |  |                                                                                                                                                   |  | 1  | 0 |  |  |
| 422 | 2 | 1 | g2242.t1                          | 1 | CORT_0A12680   |              |  | Peptidase A1; Peptidase aspartic; Peptidase aspartic, catalytic                                                                                   |  | 1  | 0 |  |  |
| 423 | 2 | 1 | g732.t1                           | 1 | CORT_0A00110   |              |  | Leucine-rich repeat; Leucine-rich repeat, typical subtype; Leucine rich repeat 4                                                                  |  | 1  | 0 |  |  |
| 424 | 2 | 1 | g5956.t1                          | 1 | CORT_0C00240   |              |  |                                                                                                                                                   |  | 1  | 0 |  |  |
| 425 | 2 | 1 | g5282.t1                          | 1 | CORT_0E04080   |              |  |                                                                                                                                                   |  | 1  | 0 |  |  |
| 426 | 2 | 1 | g2281.t1                          | 1 | CORT_0A12300   |              |  |                                                                                                                                                   |  | 1  | 0 |  |  |
| 427 | 2 | 1 | g1827.t1                          | 1 | CORT_0C04150   |              |  |                                                                                                                                                   |  | 1  | 0 |  |  |
| 428 | 2 | 1 | g3801.t1                          | 1 | CORT_0B02530   |              |  |                                                                                                                                                   |  | 1  | 0 |  |  |
| 429 | 2 | 1 | g5949.t2                          | 1 | CORT_0C00305   |              |  | Leucine-rich repeat                                                                                                                               |  | 1  | 0 |  |  |
| 430 | 7 | 6 | g1077.t1 g11.t1 g2153.t1 g4431.t1 | 1 | CPAR2_704330   |              |  | Major facilitator superfamily domain, general substrate transporter; Major facilitator superfamily; Major facilitator superfamily domain          |  | 5  | 6 |  |  |
| 431 | 7 | 6 | g1078.t1 g2152.t1 g4039.t1 g4430. | 1 | CPAR2_704340   |              |  | RmlC-like cupin domain; RmlC-like jelly roll fold; Cupin 2, conserved barrel                                                                      |  | 5  | 6 |  |  |
| 432 | 7 | 6 | g1079.t1 g2151.t1 g4038.t1 g4429. | 1 | CPAR2_704350   |              |  | Fumarylacetoacetase, C-terminal-related; Fumarylacetoacetase, C-terminal                                                                          |  | 5  | 6 |  |  |
| 433 | 6 | 5 | g1080.t1 g2150.t1 g4428.t1 g721.t | 1 | CPAR2_704360   |              |  | Mss4-like; Glutathione-dependent formaldehyde-activating enzyme/centromere protein V                                                              |  | 4  | 5 |  |  |
| 434 | 4 | 3 | g2497.t1 g4667.t1 g4675.t1        | 1 | CPAR2_807120   |              |  |                                                                                                                                                   |  | 2  | 3 |  |  |
| 435 | 4 | 2 | g280.t1 g281.t1                   | 2 | CPAR2_101750   | CPAR2_105740 |  |                                                                                                                                                   |  | 0  | 2 |  |  |
| 436 | 4 | 2 | g3538.t1 g3539.t1                 | 2 | CPAR2_204210   |              |  | Cytochrome P450, E-class, CYP52; Cytochrome P450, E-class, group II; Cytochrome P450; Cytochrome P450, conserved site                             |  | 0  | 2 |  |  |
| 437 | 4 | 2 | g3319.t1 g3324.t1                 | 2 | CPAR2_201910   | CPAR2_201960 |  |                                                                                                                                                   |  | 0  | 2 |  |  |
| 438 | 4 | 2 | g5363.t1 g5364.t1                 | 2 | CPAR2_106690   |              |  | Amino acid permease, conserved site; Amino acid permease domain; Amino acid/polyamine transporter I                                               |  | 0  | 2 |  |  |
| 439 | 4 | 2 | g344.t1 g345.t1                   | 2 | CPAR2_301850   |              |  | Thioredoxin-like fold; UAS; UBX                                                                                                                   |  | 0  | 2 |  |  |
| 440 | 4 | 2 | g3042.t1 g3051.t1                 | 2 | CPAR2_100850   |              |  | RNA recognition motif domain; Nucleotide-binding, alpha-beta plait                                                                                |  | 0  | 2 |  |  |
| 441 | 4 | 2 | g4483.t1 g4489.t1                 | 2 | CPAR2_801770   |              |  | Domain of unknown function DUF4149                                                                                                                |  | 0  | 2 |  |  |
| 442 | 4 | 2 | g585.t1 g589.t1                   | 2 | CPAR2_401460   |              |  | Thioredoxin-like fold; Glutathione S-transferase/chloride channel, C-terminal; Glutathione S-transferase, C-terminal; Glutathione S-transferase,  |  | 0  | 2 |  |  |
| 443 | 4 | 2 | g2117.t1 g2868.t1                 | 2 | CPAR2_207060   |              |  | Translation elongation/initiation factor/Ribosomal, beta-barrel; Translation elongation factor EF1A, eukaryotic/archaeal; Elongation factor, GTP- |  | 0  | 2 |  |  |
| 444 | 4 | 2 | g1690.t1 g1701.t1                 | 2 | CPAR2_702760   |              |  | Cytochrome C oxidase subunit II, transmembrane domain                                                                                             |  | 0  | 2 |  |  |
| 445 | 4 | 2 | g697.t1 g704.t1                   | 2 | CPAR2_400160   |              |  | Major facilitator superfamily domain, general substrate transporter; Major facilitator superfamily; Major facilitator superfamily domain          |  | 0  | 2 |  |  |
| 446 | 3 | 1 | g1361.t1                          | 2 | CPAR2_701870   |              |  | Peptidase aspartic, catalytic; Peptidase aspartic; Peptidase A1                                                                                   |  | -1 | 1 |  |  |
| 447 | 3 | 2 | g4088.t1 g4163.t1                 | 1 | CPAR2_806420   |              |  | Hyphally-regulated cell wall protein, N-terminal                                                                                                  |  | 1  | 2 |  |  |
| 448 | 3 | 1 | g4484.t1                          | 2 | CPAR2_801780   | CPAR2_801830 |  |                                                                                                                                                   |  | -1 | 1 |  |  |
| 449 | 3 | 2 | g2909.t1 g2920.t1                 | 1 | CPAR2_206620   |              |  | Alcohol dehydrogenase superfamily, zinc-type; Alcohol dehydrogenase, C-terminal; NAD(P)-binding domain; GroES-like                                |  | 1  | 2 |  |  |
| 450 | 3 | 2 | g4369.t1 g4370.t1                 | 1 | CPAR2_603250   |              |  |                                                                                                                                                   |  | 1  | 2 |  |  |
| 451 | 3 | 2 | g1249.t1 g1250.t1                 | 1 | CPAR2_302640   |              |  | Peptidase A1; Peptidase aspartic; Peptidase aspartic, active site; Peptidase aspartic, catalytic                                                  |  | 1  | 2 |  |  |
| 452 | 3 | 1 | g5446.t1                          | 2 | CPAR2_107350   |              |  | Pirin, N-terminal domain; RmlC-like jelly roll fold; Pirin, C-terminal domain; Pirin; RmlC-like cupin domain                                      |  | -1 | 1 |  |  |
| 453 | 3 | 1 | g2795.t1                          | 2 | CPAR2_207810   | CPAR2_207860 |  |                                                                                                                                                   |  | -1 | 1 |  |  |
| 454 | 2 | 1 | g3827.t1                          | 1 | CPAR2_502130   |              |  | Glycoside hydrolase, family 18, catalytic domain; Flocculin type 3 repeat; Glycoside hydrolase, superfamily; Glycoside hydrolase, catalytic doma  |  | 0  | 1 |  |  |
| 455 | 2 | 1 | g546.t1                           | 1 | CPAR2_401770   |              |  | Heat shock protein DnaJ, N-terminal; Heat shock protein DnaJ; RNA recognition motif domain; Nucleotide-binding, alpha-beta plait; Heat shock      |  | 0  | 1 |  |  |
| 456 | 2 | 1 | g1081.t1                          | 1 | CPAR2_704370   |              |  | Zn(2)-C6 fungal-type DNA-binding domain; Transcription factor, fungi                                                                              |  | 0  | 1 |  |  |
| 457 | 2 | 1 | g16.t1                            | 1 | CapafMp06      |              |  | Cytochrome c oxidase, subunit I domain; Cytochrome c oxidase, subunit I; Cytochrome c oxidase, subunit I, copper-binding site                     |  | 0  | 1 |  |  |
| 458 | 2 | 1 | g3604.t1                          | 1 | CPAR2_204830   |              |  | Cyclin-like; Cyclin PHO80-like                                                                                                                    |  | 0  | 1 |  |  |
| 459 | 2 | 1 | g15.t1                            | 1 | CapafMp10      |              |  | ATPase, FO/VO complex, subunit C; ATPase, F0 complex, subunit C; ATPase, F0 complex, subunit C, DCCD-binding site                                 |  | 0  | 1 |  |  |
| 460 | 2 | 1 | g5132.t1                          | 1 | CPAR2_104400   |              |  | Glycoside hydrolase, superfamily; Glycoside hydrolase, family 5; Glycoside hydrolase, catalytic domain                                            |  | 0  | 1 |  |  |
| 461 | 2 | 1 | g1702.t1                          | 1 | CPAR2_702750   |              |  | Thioredoxin-like fold; Redoxin                                                                                                                    |  | 0  | 1 |  |  |
| 462 | 2 | 1 | g4108.t1                          | 1 | CPAR2_600640   |              |  |                                                                                                                                                   |  | 0  | 1 |  |  |
| 463 | 2 | 1 | g376.t1                           | 1 | CPAR2_403420   |              |  | Peptidase S10, serine carboxypeptidase, active site; Peptidase S10, serine carboxypeptidase                                                       |  | 0  | 1 |  |  |
| 464 | 2 | 1 | g5047.t1                          | 1 | CPAR2_103590   |              |  |                                                                                                                                                   |  | 0  | 1 |  |  |
| 465 | 2 | 1 | g3043.t1                          | 1 | CPAR2_100850.1 |              |  |                                                                                                                                                   |  | 0  | 1 |  |  |
| 466 | 2 | 1 | g1272.t1                          | 1 | CPAR2_302450   |              |  |                                                                                                                                                   |  | 0  | 1 |  |  |
| 467 | 2 | 1 | g3048.t1                          | 1 | CPAR2_100900.1 |              |  |                                                                                                                                                   |  | 0  | 1 |  |  |

|     |    |   |          |   |              |   |              |                                                                                                                                                  |  |    |    |  |  |
|-----|----|---|----------|---|--------------|---|--------------|--------------------------------------------------------------------------------------------------------------------------------------------------|--|----|----|--|--|
| 468 | 2  | 1 | g1270.t1 |   |              | 1 | CPAR2_302470 | Ribosomal protein MRP10, mitochondrial; MTCP1                                                                                                    |  | 0  | 1  |  |  |
| 469 | 2  | 1 | g14.t1   |   |              | 1 | CapafMp12    | NADH:ubiquinone oxidoreductase, subunit 1, conserved site; NADH:ubiquinone oxidoreductase, subunit 1/F420H2 oxidoreductase subunit H             |  | 0  | 1  |  |  |
| 470 | 2  | 1 | g5460.t1 |   |              | 1 | CPAR2_107690 | SMAD/FHA domain; Forkhead-associated (FHA) domain                                                                                                |  | 0  | 1  |  |  |
| 471 | 2  | 1 | g13.t1   |   |              | 1 | CapafMp15    | NADH dehydrogenase subunit 5, C-terminal; NADH:ubiquinone oxidoreductase, chain 5/L, N-terminal; NADH:ubiquinone/plastoquinone oxidore           |  | 0  | 1  |  |  |
| 472 | 2  | 1 | g1256.t1 |   |              | 1 | CPAR2_302580 | Phosphatidic acid phosphatase type 2/haloperoxidase; Phosphatidic acid phosphatase/chloroperoxidase, N-terminal                                  |  | 0  | 1  |  |  |
| 473 | 2  | 1 | g2070.t1 |   |              | 1 | CPAR2_407200 | Zinc finger, C2H2                                                                                                                                |  | 0  | 1  |  |  |
| 474 | 11 |   |          | 6 | CORT_0D00770 | 5 | CPAR2_105750 | Homeodomain-like                                                                                                                                 |  | -5 | -6 |  |  |
| 475 | 4  |   |          | 2 | CORT_0G01470 | 2 | CPAR2_701300 | Amine oxidase                                                                                                                                    |  | -2 | -2 |  |  |
| 476 | 4  |   |          | 1 | CORT_0B03750 | 3 | CPAR2_102490 | CPAR2_102510 CPAR2_102520                                                                                                                        |  | -3 | -1 |  |  |
| 477 | 4  |   |          | 2 | CORT_0C01410 | 2 | CPAR2_404720 | CPAR2_500700                                                                                                                                     |  | -2 | -2 |  |  |
| 478 | 4  |   |          | 1 | CORT_0D00100 | 3 | CPAR2_300020 | CPAR2_504210 CPAR2_603790                                                                                                                        |  | -3 | -1 |  |  |
| 479 | 3  |   |          | 2 | CORT_0B07390 | 1 | CPAR2_106150 | Sybindin-like protein; Longin-like domain                                                                                                        |  | -1 | -2 |  |  |
| 480 | 3  |   |          | 1 | CORT_0E03030 | 2 | CPAR2_403000 | Amino acid transporter, transmembrane                                                                                                            |  | -2 | -1 |  |  |
| 481 | 3  |   |          | 1 | CORT_0E00560 | 2 | CPAR2_400450 | CPAR2_400530                                                                                                                                     |  | -2 | -1 |  |  |
| 482 | 3  |   |          | 1 | CORT_0D00600 | 2 | CPAR2_200510 | Dynactin p62                                                                                                                                     |  | -2 | -1 |  |  |
| 483 | 2  |   |          | 1 | CORT_0F00360 | 1 | CPAR2_100250 |                                                                                                                                                  |  | -1 | -1 |  |  |
| 484 | 2  |   |          | 1 | CORT_0B04530 | 1 | CPAR2_103300 |                                                                                                                                                  |  | -1 | -1 |  |  |
| 485 | 2  |   |          | 1 | CORT_0H02200 | 1 | CPAR2_600600 |                                                                                                                                                  |  | -1 | -1 |  |  |
| 486 | 2  |   |          | 1 | CORT_0C04470 | 1 | CPAR2_405060 |                                                                                                                                                  |  | -1 | -1 |  |  |
| 487 | 2  |   |          | 1 | CORT_0D02950 | 1 | CPAR2_202870 |                                                                                                                                                  |  | -1 | -1 |  |  |
| 488 | 2  |   |          | 1 | CORT_0B10620 | 1 | CPAR2_109545 |                                                                                                                                                  |  | -1 | -1 |  |  |
| 489 | 2  |   |          | 1 | CORT_0D03780 | 1 | CPAR2_203670 | GTP binding domain                                                                                                                               |  | -1 | -1 |  |  |
| 490 | 2  |   |          | 1 | CORT_0B02230 | 1 | CPAR2_502070 |                                                                                                                                                  |  | -1 | -1 |  |  |
| 491 | 2  |   |          | 1 | CORT_0E01140 | 1 | CPAR2_401100 |                                                                                                                                                  |  | -1 | -1 |  |  |
| 492 | 2  |   |          | 1 | CORT_0C06170 | 1 | CPAR2_406750 | Gtr1/RagA G protein                                                                                                                              |  | -1 | -1 |  |  |
| 493 | 2  |   |          | 1 | CORT_0E05960 | 1 | CPAR2_303800 |                                                                                                                                                  |  | -1 | -1 |  |  |
| 494 | 2  |   |          | 1 | CORT_0F04335 | 1 | CPAR2_603375 | Uncharacterised protein family YNL211C                                                                                                           |  | -1 | -1 |  |  |
| 495 | 2  |   |          | 1 | CORT_0F00400 | 1 | CPAR2_100290 |                                                                                                                                                  |  | -1 | -1 |  |  |
| 496 | 2  |   |          | 1 | CORT_0G00700 | 1 | CPAR2_702530 |                                                                                                                                                  |  | -1 | -1 |  |  |
| 497 | 2  |   |          | 1 | CORT_0C02210 | 1 | CPAR2_806960 | EF-hand-like domain; EPS15 homology (EH)                                                                                                         |  | -1 | -1 |  |  |
| 498 | 2  |   |          | 1 | CORT_0A00460 | 1 | CPAR2_800380 |                                                                                                                                                  |  | -1 | -1 |  |  |
| 499 | 2  |   |          | 1 | CORT_0B11590 | 1 | CPAR2_110490 | Leucine-rich repeat; Leucine-rich repeat, typical subtype; Leucine rich repeat 4                                                                 |  | -1 | -1 |  |  |
| 500 | 2  |   |          | 1 | CORT_0D03910 | 1 | CPAR2_203800 | Nucleotide excision repair, TFIIH, subunit TTDA                                                                                                  |  | -1 | -1 |  |  |
| 501 | 2  |   |          | 1 | CORT_0B09070 | 1 | CPAR2_107880 | RNA recognition motif domain; Nucleotide-binding, alpha-beta plait                                                                               |  | -1 | -1 |  |  |
| 502 | 2  |   |          | 1 | CORT_0A04490 | 1 | CPAR2_804500 | Adaptor protein complex, sigma subunit; AP complex, mu/sigma subunit; Longin-like domain                                                         |  | -1 | -1 |  |  |
| 503 | 2  |   |          | 1 | CORT_0A03440 | 1 | CPAR2_803420 | Ribosomal protein L39e domain; Ribosomal protein L39e, conserved site; Ribosomal protein L39e                                                    |  | -1 | -1 |  |  |
| 504 | 2  |   |          | 1 | CORT_0G01245 | 1 | CPAR2_701090 | Translation machinery associated TMA7                                                                                                            |  | -1 | -1 |  |  |
| 505 | 2  |   |          | 1 | CORT_0E05240 | 1 | CPAR2_303100 |                                                                                                                                                  |  | -1 | -1 |  |  |
| 506 | 2  |   |          | 1 | CORT_0F03110 | 1 | CPAR2_602135 |                                                                                                                                                  |  | -1 | -1 |  |  |
| 507 | 2  |   |          | 1 | CORT_0B01500 | 1 | CPAR2_501340 | Cation efflux protein                                                                                                                            |  | -1 | -1 |  |  |
| 508 | 2  |   |          | 1 | CORT_0C01630 | 1 | CPAR2_807510 | Proteolipid membrane potential modulator                                                                                                         |  | -1 | -1 |  |  |
| 509 | 2  |   |          | 1 | CORT_0D04190 | 1 | CPAR2_204090 |                                                                                                                                                  |  | -1 | -1 |  |  |
| 510 | 2  |   |          | 1 | CORT_0B07940 | 1 | CPAR2_106710 | SET domain                                                                                                                                       |  | -1 | -1 |  |  |
| 511 | 2  |   |          | 1 | CORT_0C05160 | 1 | CPAR2_405750 |                                                                                                                                                  |  | -1 | -1 |  |  |
| 512 | 2  |   |          | 1 | CORT_0B02290 | 1 | CPAR2_502120 | Glycoside hydrolase, family 18, catalytic domain; Flocculin type 3 repeat; Glycoside hydrolase, superfamily; Glycoside hydrolase, catalytic doma |  | -1 | -1 |  |  |
| 513 | 2  |   |          | 1 | CORT_0A06200 | 1 | CPAR2_206850 | Mitochondrial outer membrane translocase complex, subunit Tom5                                                                                   |  | -1 | -1 |  |  |
| 514 | 2  |   |          | 1 | CORT_0F04210 | 1 | CPAR2_603240 | Ribosomal protein L1; Ribosomal protein L1, 3-layer alpha/beta-sandwich; Ribosomal protein L1, superfamily                                       |  | -1 | -1 |  |  |
| 515 | 2  |   |          | 1 | CORT_0B07290 | 1 | CPAR2_106060 | G-patch domain                                                                                                                                   |  | -1 | -1 |  |  |
| 516 | 2  |   |          | 1 | CORT_0H01110 | 1 | CPAR2_301090 | Nucleotide binding protein, PINc                                                                                                                 |  | -1 | -1 |  |  |
| 517 | 2  |   |          | 1 | CORT_0F04010 | 1 | CPAR2_603040 |                                                                                                                                                  |  | -1 | -1 |  |  |
| 518 | 2  |   |          | 1 | CORT_0A10230 | 1 | CPAR2_210880 |                                                                                                                                                  |  | -1 | -1 |  |  |
| 519 | 2  |   |          | 1 | CORT_0D04040 | 1 | CPAR2_203930 | Terpenoid cyclases/protein prenyltransferase alpha-alpha toroid; Prenyltransferase/squalene oxidase                                              |  | -1 | -1 |  |  |

|     |   |  |   |              |   |                |                                                                                                                                        |  |  |    |    |  |
|-----|---|--|---|--------------|---|----------------|----------------------------------------------------------------------------------------------------------------------------------------|--|--|----|----|--|
| 520 | 2 |  | 1 | CORT_0D02960 | 1 | CPAR2_202880   |                                                                                                                                        |  |  | -1 | -1 |  |
| 521 | 2 |  | 1 | CORT_0A01680 | 1 | CPAR2_801610   |                                                                                                                                        |  |  | -1 | -1 |  |
| 522 | 2 |  | 1 | CORT_0B02380 | 1 | CPAR2_502200   | Cyclin-dependent kinase, regulatory subunit                                                                                            |  |  | -1 | -1 |  |
| 523 | 2 |  | 1 | CORT_0A11950 | 1 | CPAR2_212660   |                                                                                                                                        |  |  | -1 | -1 |  |
| 524 | 2 |  | 1 | CORT_0F00877 | 1 | CPAR2_100780   |                                                                                                                                        |  |  | -1 | -1 |  |
| 525 | 2 |  | 1 | CORT_0G02210 | 1 | CPAR2_701980   | Proteasome chaperone 3/4, fungi                                                                                                        |  |  | -1 | -1 |  |
| 526 | 2 |  | 1 | CORT_0A13370 | 1 | CPAR2_214050   |                                                                                                                                        |  |  | -1 | -1 |  |
| 527 | 2 |  | 1 | CORT_0B11560 | 1 | CPAR2_110460   | Actin cortical patch SUR7/pH-response regulator Pall                                                                                   |  |  | -1 | -1 |  |
| 528 | 2 |  | 1 | CORT_0H02370 | 1 | CPAR2_600420   |                                                                                                                                        |  |  | -1 | -1 |  |
| 529 | 2 |  | 1 | CORT_0E03380 | 1 | CPAR2_403360   |                                                                                                                                        |  |  | -1 | -1 |  |
| 530 | 2 |  | 1 | CORT_0B06820 | 1 | CPAR2_105600   | Ribosomal protein L36                                                                                                                  |  |  | -1 | -1 |  |
| 531 | 2 |  | 1 | CORT_0G02550 | 1 | CPAR2_702370   | F-box domain, cyclin-like                                                                                                              |  |  | -1 | -1 |  |
| 532 | 2 |  | 1 | CORT_0E03040 | 1 | CPAR2_403010   | Mediator complex, subunit Med12                                                                                                        |  |  | -1 | -1 |  |
| 533 | 2 |  | 1 | CORT_0A09180 | 1 | CPAR2_209920   |                                                                                                                                        |  |  | -1 | -1 |  |
| 534 | 2 |  | 1 | CORT_0A09470 | 1 | CPAR2_210190   |                                                                                                                                        |  |  | -1 | -1 |  |
| 535 | 2 |  | 1 | CORT_0C07170 | 1 | CPAR2_407830   | DNA-directed RNA polymerase, M/15kDa subunit; DNA-directed RNA polymerase, subunit C11/M/9; Zinc finger, TFIIIS-type                   |  |  | -1 | -1 |  |
| 536 | 2 |  | 1 | CORT_0G02970 | 1 | CPAR2_702860   | C-CAP/cofactor C-like domain; Tubulin binding cofactor C                                                                               |  |  | -1 | -1 |  |
| 537 | 2 |  | 1 | CORT_0A07970 | 1 | CPAR2_208690   | WD40/YVTN repeat-like-containing domain; WD40 repeat; WD40-repeat-containing domain                                                    |  |  | -1 | -1 |  |
| 538 | 2 |  | 1 | CORT_0F02140 | 1 | CPAR2_601140   |                                                                                                                                        |  |  | -1 | -1 |  |
| 539 | 2 |  | 1 | CORT_0E01380 | 1 | CPAR2_401330   | Complex 1 LYR protein                                                                                                                  |  |  | -1 | -1 |  |
| 540 | 2 |  | 1 | CORT_0F03450 | 1 | CPAR2_602480   |                                                                                                                                        |  |  | -1 | -1 |  |
| 541 | 2 |  | 1 | CORT_0E06540 | 1 | CPAR2_304340   | Armadillo-type fold; Armadillo-like helical; Ataxin-10 domain                                                                          |  |  | -1 | -1 |  |
| 542 | 2 |  | 1 | CORT_0D04880 | 1 | CPAR2_204770   | UBA/THIF-type NAD/FAD binding fold; NAD(P)-binding domain; Molybdenum cofactor biosynthesis, MoeB; E1-like protein-activating enzyme G |  |  | -1 | -1 |  |
| 543 | 2 |  | 1 | CORT_0B01990 | 1 | CPAR2_501840   | GSKIP/TIF31 domain; Protein of unknown function DUF727                                                                                 |  |  | -1 | -1 |  |
| 544 | 2 |  | 1 | CORT_0E03890 | 1 | CPAR2_403870   |                                                                                                                                        |  |  | -1 | -1 |  |
| 545 | 2 |  | 1 | CORT_0D05410 | 1 | CPAR2_205290   |                                                                                                                                        |  |  | -1 | -1 |  |
| 546 | 2 |  | 1 | CORT_0E05780 | 1 | CPAR2_303630   |                                                                                                                                        |  |  | -1 | -1 |  |
| 547 | 2 |  | 1 | CORT_0F04070 | 1 | CPAR2_603100   | Zinc finger C2H2-type/integrase DNA-binding domain                                                                                     |  |  | -1 | -1 |  |
| 548 | 2 |  | 1 | CORT_0E05040 | 1 | CPAR2_302900   | Zn(2)-C6 fungal-type DNA-binding domain                                                                                                |  |  | -1 | -1 |  |
| 549 | 2 |  | 1 | CORT_0A07495 | 1 | CPAR2_208200   |                                                                                                                                        |  |  | -1 | -1 |  |
| 550 | 2 |  | 1 | CORT_0A03220 | 1 | CPAR2_803245   |                                                                                                                                        |  |  | -1 | -1 |  |
| 551 | 2 |  | 1 | CORT_0H01050 | 1 | CPAR2_301030   |                                                                                                                                        |  |  | -1 | -1 |  |
| 552 | 2 |  | 1 | CORT_0B10000 | 1 | CPAR2_108900   | GRASP55/65; GRASP55/65 PDZ-like domain                                                                                                 |  |  | -1 | -1 |  |
| 553 | 2 |  | 1 | CORT_0A09930 | 1 | CPAR2_210600   | Allergen V5/Tpx-1-related, conserved site; Allergen V5/Tpx-1-related; CAP domain                                                       |  |  | -1 | -1 |  |
| 554 | 2 |  | 1 | CORT_0G01920 | 1 | CPAR2_701770   | H/ACA ribonucleoprotein complex, subunit Nop10                                                                                         |  |  | -1 | -1 |  |
| 555 | 2 |  | 1 | CORT_0H00270 | 1 | CPAR2_300210   |                                                                                                                                        |  |  | -1 | -1 |  |
| 556 | 2 |  | 1 | CORT_0A07730 | 1 | CPAR2_208450   |                                                                                                                                        |  |  | -1 | -1 |  |
| 557 | 2 |  | 1 | CORT_0B09530 | 1 | CPAR2_108440   | Uncharacterised protein family SERF                                                                                                    |  |  | -1 | -1 |  |
| 558 | 2 |  | 1 | CORT_0G02520 | 1 | CPAR2_702340   | Vacuolar protein sorting 55                                                                                                            |  |  | -1 | -1 |  |
| 559 | 2 |  | 1 | CORT_0E01550 | 1 | CPAR2_401500   |                                                                                                                                        |  |  | -1 | -1 |  |
| 560 | 2 |  | 1 | CORT_0D02630 | 1 | CPAR2_202550   | Ribosomal protein S30                                                                                                                  |  |  | -1 | -1 |  |
| 561 | 2 |  | 1 | CORT_0B04310 | 1 | CPAR2_103040   |                                                                                                                                        |  |  | -1 | -1 |  |
| 562 | 2 |  | 1 | CORT_0F00874 | 1 | CPAR2_100770   |                                                                                                                                        |  |  | -1 | -1 |  |
| 563 | 2 |  | 1 | CORT_0A13130 | 1 | CPAR2_213840   | Cytochrome c oxidase copper chaperone; MTCP1                                                                                           |  |  | -1 | -1 |  |
| 564 | 2 |  | 1 | CORT_0B06570 | 1 | CPAR2_105360   |                                                                                                                                        |  |  | -1 | -1 |  |
| 565 | 2 |  | 1 | CORT_0C01440 | 1 | CPAR2_807690   |                                                                                                                                        |  |  | -1 | -1 |  |
| 566 | 2 |  | 1 | CORT_0F00110 | 1 | CPAR2_200010   | Leucine-rich repeat; Leucine-rich repeat, typical subtype; Leucine rich repeat 4                                                       |  |  | -1 | -1 |  |
| 567 | 2 |  | 1 | CORT_0B01560 | 1 | CPAR2_501415   | Protein of unknown function DUF3743                                                                                                    |  |  | -1 | -1 |  |
| 568 | 2 |  | 1 | CORT_0H00210 | 1 | CPAR2_300150   | Adenosine deaminase/editase                                                                                                            |  |  | -1 | -1 |  |
| 569 | 2 |  | 1 | CORT_0F02420 | 1 | CPAR2_601420   |                                                                                                                                        |  |  | -1 | -1 |  |
| 570 | 2 |  | 1 | CORT_0G03650 | 1 | CPAR2_703460.1 |                                                                                                                                        |  |  | -1 | -1 |  |
| 571 | 2 |  | 1 | CORT_0B07810 | 1 | CPAR2_106560   | Proteolipid membrane potential modulator                                                                                               |  |  | -1 | -1 |  |

|     |   |  |   |              |   |              |                                                                                                                                              |    |    |  |  |
|-----|---|--|---|--------------|---|--------------|----------------------------------------------------------------------------------------------------------------------------------------------|----|----|--|--|
| 572 | 2 |  | 1 | CORT_0E01480 | 1 | CPAR2_401430 | Ribosomal protein, zinc-binding domain; Ribosomal protein L40e                                                                               | -1 | -1 |  |  |
| 573 | 2 |  | 1 | CORT_0D01375 | 1 | CPAR2_201330 | Micro-fibrillar-associated protein 1, C-terminal                                                                                             | -1 | -1 |  |  |
| 574 | 2 |  | 1 | CORT_0B07540 | 1 | CPAR2_106300 | EKC/KEOPS complex, subunit Gon7                                                                                                              | -1 | -1 |  |  |
| 575 | 2 |  | 1 | CORT_0A07640 | 1 | CPAR2_208350 | Acyl-CoA N-acyltransferase; GNAT domain                                                                                                      | -1 | -1 |  |  |
| 576 | 2 |  | 1 | CORT_0B06040 | 1 | CPAR2_104840 |                                                                                                                                              | -1 | -1 |  |  |
| 577 | 2 |  | 1 | CORT_0E06090 | 1 | CPAR2_303910 | Appr-1-p processing                                                                                                                          | -1 | -1 |  |  |
| 578 | 2 |  | 1 | CORT_0F00550 | 1 | CPAR2_100450 | Peptidase S26A, signal peptidase I; Peptidase S26A, signal peptidase I, conserved site; Peptidase S24/S26A/S26B/S26C, beta-ribbon domain;    | -1 | -1 |  |  |
| 579 | 2 |  | 1 | CORT_0A06270 | 1 | CPAR2_206910 |                                                                                                                                              | -1 | -1 |  |  |
| 580 | 2 |  | 1 | CORT_0C03230 | 1 | CPAR2_805920 |                                                                                                                                              | -1 | -1 |  |  |
| 581 | 2 |  | 1 | CORT_0A10515 | 1 | CPAR2_211170 |                                                                                                                                              | -1 | -1 |  |  |
| 582 | 2 |  | 1 | CORT_0D00940 | 1 | CPAR2_200850 | Prefoldin; Prefoldin beta-like                                                                                                               | -1 | -1 |  |  |
| 583 | 2 |  | 1 | CORT_0C03510 | 1 | CPAR2_404080 |                                                                                                                                              | -1 | -1 |  |  |
| 584 | 2 |  | 1 | CORT_0A04360 | 1 | CPAR2_804320 |                                                                                                                                              | -1 | -1 |  |  |
| 585 | 2 |  | 1 | CORT_0A08640 | 1 | CPAR2_209370 | RNA recognition motif domain; Nucleotide-binding, alpha-beta plait                                                                           | -1 | -1 |  |  |
| 586 | 2 |  | 1 | CORT_0A08810 | 1 | CPAR2_209540 | GRIP                                                                                                                                         | -1 | -1 |  |  |
| 587 | 2 |  | 1 | CORT_0A11570 | 1 | CPAR2_212240 | Nucleotide-binding, alpha-beta plait; RNA recognition motif domain                                                                           | -1 | -1 |  |  |
| 588 | 2 |  | 1 | CORT_0C04270 | 1 | CPAR2_404850 |                                                                                                                                              | -1 | -1 |  |  |
| 589 | 2 |  | 1 | CORT_0B08100 | 1 | CPAR2_106870 | Zinc finger, DHHC-type, palmitoyltransferase                                                                                                 | -1 | -1 |  |  |
| 590 | 2 |  | 1 | CORT_0F00850 | 1 | CPAR2_100730 |                                                                                                                                              | -1 | -1 |  |  |
| 591 | 2 |  | 1 | CORT_0E02080 | 1 | CPAR2_402030 |                                                                                                                                              | -1 | -1 |  |  |
| 592 | 2 |  | 1 | CORT_0B02730 | 1 | CPAR2_502530 | Transcription initiation Spt4-like; Transcription initiation Spt4; Spt4/RpoE2 zinc finger                                                    | -1 | -1 |  |  |
| 593 | 2 |  | 1 | CORT_0B05590 | 1 | CPAR2_104350 | PHF5-like                                                                                                                                    | -1 | -1 |  |  |
| 594 | 2 |  | 1 | CORT_0G04240 | 1 | CPAR2_704060 | HSP20-like chaperone; Alpha crystallin/Hsp20 domain                                                                                          | -1 | -1 |  |  |
| 595 | 2 |  | 1 | CORT_0D00260 | 1 | CPAR2_200180 | Zinc finger, RING-type; Zinc finger, RING/FYVE/PHD-type; Anaphase-promoting complex subunit 11                                               | -1 | -1 |  |  |
| 596 | 2 |  | 1 | CORT_0C01530 | 1 | CPAR2_807610 | FAR-17a/AIG1-like protein                                                                                                                    | -1 | -1 |  |  |
| 597 | 2 |  | 1 | CORT_0E05600 | 1 | CPAR2_303460 | Non-classical export protein 1                                                                                                               | -1 | -1 |  |  |
| 598 | 2 |  | 1 | CORT_0C05105 | 1 | CPAR2_405695 |                                                                                                                                              | -1 | -1 |  |  |
| 599 | 2 |  | 1 | CORT_0A09130 | 1 | CPAR2_209870 | Cytochrome c oxidase, subunit VIIa, fungal                                                                                                   | -1 | -1 |  |  |
| 600 | 2 |  | 1 | CORT_0C02810 | 1 | CPAR2_806330 | Oligosacaryltransferase                                                                                                                      | -1 | -1 |  |  |
| 601 | 2 |  | 1 | CORT_0A00180 | 1 | CPAR2_800070 |                                                                                                                                              | -1 | -1 |  |  |
| 602 | 2 |  | 1 | CORT_0E00880 | 1 | CPAR2_400840 | Transmembrane protein 93                                                                                                                     | -1 | -1 |  |  |
| 603 | 2 |  | 1 | CORT_0B05420 | 1 | CPAR2_104195 |                                                                                                                                              | -1 | -1 |  |  |
| 604 | 2 |  | 1 | CORT_0B06790 | 1 | CPAR2_105570 | RNA recognition motif domain; Nucleotide-binding, alpha-beta plait                                                                           | -1 | -1 |  |  |
| 605 | 2 |  | 1 | CORT_0B04710 | 1 | CPAR2_103500 | Ribonuclease P/MRP protein subunit                                                                                                           | -1 | -1 |  |  |
| 606 | 2 |  | 1 | CORT_0A04090 | 1 | CPAR2_804060 | Acetyl-coenzyme A carboxyltransferase, N-terminal; Single hybrid motif; Biotin carboxylation domain; Acetyl-CoA carboxylase, central domain; | -1 | -1 |  |  |
| 607 | 2 |  | 1 | CORT_0A04420 | 1 | CPAR2_804260 | Ornithine cyclodeaminase/mu-crystallin; NAD(P)-binding domain                                                                                | -1 | -1 |  |  |
| 608 | 2 |  | 1 | CORT_0B01630 | 1 | CPAR2_501480 | Histone deacetylase domain; Histone deacetylase superfamily                                                                                  | -1 | -1 |  |  |
| 609 | 2 |  | 1 | CORT_0C06265 | 1 | CPAR2_406905 |                                                                                                                                              | -1 | -1 |  |  |
| 610 | 2 |  | 1 | CORT_0F00100 | 1 | CPAR2_100020 | Leucine-rich repeat; Leucine rich repeat 4                                                                                                   | -1 | -1 |  |  |
| 611 | 2 |  | 1 | CORT_0D02110 | 1 | CPAR2_202060 |                                                                                                                                              | -1 | -1 |  |  |
| 612 | 2 |  | 1 | CORT_0E01770 | 1 | CPAR2_401720 |                                                                                                                                              | -1 | -1 |  |  |
| 613 | 2 |  | 1 | CORT_0A00170 | 1 | CPAR2_800060 |                                                                                                                                              | -1 | -1 |  |  |
| 614 | 2 |  | 1 | CORT_0B03110 | 1 | CPAR2_101820 | Glutaredoxin-like; Thioredoxin-like fold                                                                                                     | -1 | -1 |  |  |
| 615 | 2 |  | 1 | CORT_0G02840 | 1 | CPAR2_702710 |                                                                                                                                              | -1 | -1 |  |  |
| 616 | 2 |  | 1 | CORT_0A04850 | 1 | CPAR2_804850 |                                                                                                                                              | -1 | -1 |  |  |
| 617 | 2 |  | 1 | CORT_0F00670 | 1 | CPAR2_100565 |                                                                                                                                              | -1 | -1 |  |  |
| 618 | 2 |  | 1 | CORT_0B06660 | 1 | CPAR2_105440 |                                                                                                                                              | -1 | -1 |  |  |
| 619 | 2 |  | 1 | CORT_0B03960 | 1 | CPAR2_801735 |                                                                                                                                              | -1 | -1 |  |  |
| 620 | 2 |  | 1 | CORT_0A03020 | 1 | CPAR2_802970 | GPI-GlcNAc transferase complex, PIG-H component, conserved domain                                                                            | -1 | -1 |  |  |
| 621 | 2 |  | 1 | CORT_0C02650 | 1 | CPAR2_806500 | Zinc finger C2H2-type/integrase DNA-binding domain; Zinc finger, C2H2-like; Zinc finger, C2H2                                                | -1 | -1 |  |  |
| 622 | 2 |  | 1 | CORT_0A11930 | 1 | CPAR2_212610 | ATPase, V0 complex, subunit E                                                                                                                | -1 | -1 |  |  |
| 623 | 2 |  | 1 | CORT_0D06010 | 1 | CPAR2_205880 | Ribosomal protein S14, conserved site; Ribosomal protein S14                                                                                 | -1 | -1 |  |  |

|     |    |    |                                                                                                                     |   |              |   |                |                                                                                                                                  |    |    |  |  |
|-----|----|----|---------------------------------------------------------------------------------------------------------------------|---|--------------|---|----------------|----------------------------------------------------------------------------------------------------------------------------------|----|----|--|--|
| 624 | 2  |    |                                                                                                                     | 1 | CORT_0B04300 | 1 | CPAR2_103030   | Ribosomal protein L30, ferredoxin-like fold domain; Ribosomal protein L30, conserved site; Ribosomal protein L30, bacterial-type | -1 | -1 |  |  |
| 625 | 2  |    |                                                                                                                     | 1 | CORT_0C06930 | 1 | CPAR2_407590   |                                                                                                                                  | -1 | -1 |  |  |
| 626 | 2  |    |                                                                                                                     | 1 | CORT_0G03420 | 1 | CPAR2_703250   |                                                                                                                                  | -1 | -1 |  |  |
| 627 | 2  |    |                                                                                                                     | 1 | CORT_0D02620 | 1 | CPAR2_202540   |                                                                                                                                  | -1 | -1 |  |  |
| 628 | 2  |    |                                                                                                                     | 1 | CORT_0B00830 | 1 | CPAR2_500680.1 |                                                                                                                                  | -1 | -1 |  |  |
| 629 | 2  |    |                                                                                                                     | 1 | CORT_0D03740 | 1 | CPAR2_203630   | Fat storage-inducing transmembrane protein                                                                                       | -1 | -1 |  |  |
| 630 | 2  |    |                                                                                                                     | 1 | CORT_0E04120 | 1 | CPAR2_302000   | Leucine-rich repeat; Leucine rich repeat 4                                                                                       | -1 | -1 |  |  |
| 631 | 2  |    |                                                                                                                     | 1 | CORT_0B07240 | 1 | CPAR2_106015   |                                                                                                                                  | -1 | -1 |  |  |
| 632 | 2  |    |                                                                                                                     | 1 | CORT_0E04300 | 1 | CPAR2_302200   |                                                                                                                                  | -1 | -1 |  |  |
| 633 | 2  |    |                                                                                                                     | 1 | CORT_0F01260 | 1 | CPAR2_101170   |                                                                                                                                  | -1 | -1 |  |  |
| 634 | 2  |    |                                                                                                                     | 1 | CORT_0F03580 | 1 | CPAR2_602610   | Uncharacterised domain Flo11-relatedl, N-terminal                                                                                | -1 | -1 |  |  |
| 635 | 2  |    |                                                                                                                     | 1 | CORT_0F04605 | 1 | CPAR2_603640   |                                                                                                                                  | -1 | -1 |  |  |
| 636 | 2  |    |                                                                                                                     | 1 | CORT_0D04140 | 1 | CPAR2_204040   |                                                                                                                                  | -1 | -1 |  |  |
| 637 | 2  |    |                                                                                                                     | 1 | CORT_0G03230 | 1 | CPAR2_703090   | Tetratricopeptide repeat; Tetratricopeptide-like helical; Tetratricopeptide repeat-containing domain; Tetratricopeptide TPR2     | -1 | -1 |  |  |
| 638 | 2  |    |                                                                                                                     | 1 | CORT_0D02600 | 1 | CPAR2_202520   |                                                                                                                                  | -1 | -1 |  |  |
| 639 | 2  |    |                                                                                                                     | 1 | CORT_0E06360 | 1 | CPAR2_304170   | Ribosomal protein L34                                                                                                            | -1 | -1 |  |  |
| 640 | 2  |    |                                                                                                                     | 1 | CORT_0C03700 | 1 | CPAR2_404350   |                                                                                                                                  | -1 | -1 |  |  |
| 641 | 2  |    |                                                                                                                     | 1 | CORT_0F03360 | 1 | CPAR2_602380   |                                                                                                                                  | -1 | -1 |  |  |
| 642 | 13 | 13 | g1708.t1 g1777.t1 g2963.t1 g3733.t2 g3751.t1 g3768.t1 g4126.t1 g4133.t1 g4138.t1 g4816.t2 g4817.t1 g4837.t1 g909.t1 |   |              |   |                |                                                                                                                                  | 13 | 13 |  |  |
| 643 | 10 | 10 | g1774.t1 g29.t1 g2935.t1 g2946.t1 g2994.t1 g326.t1 g333.t1 g3776.t1 g3791.t1 g4847.t1                               |   |              |   |                |                                                                                                                                  | 10 | 10 |  |  |
| 644 | 10 | 10 | g1072.t1 g2149.t1 g2155.t1 g3132.t1 g323.t1 g4041.t1 g4                                                             |   |              |   |                | Leucine-rich repeat; Leucine rich repeat 4                                                                                       | 10 | 10 |  |  |
| 645 | 8  | 8  | g1773.t1 g3713.t1 g5397.t1 g5701.t1 g5702.t1 g61.t1 g85                                                             |   |              |   |                | Protein of unknown function DUF3445                                                                                              | 8  | 8  |  |  |
| 646 | 7  | 7  | g1717.t1 g1737.t1 g2932.t1 g2948.t1 g2966.t1 g42.t1 g56.t1                                                          |   |              |   |                |                                                                                                                                  | 7  | 7  |  |  |
| 647 | 6  | 6  | g1538.t1 g2148.t1 g2156.t1 g3135.t3 g38.t1 g65.t1                                                                   |   |              |   |                | Leucine-rich repeat; Leucine rich repeat 4                                                                                       | 6  | 6  |  |  |
| 648 | 6  | 6  | g2224.t1 g278.t1 g308.t1 g4075.t1 g5622.t1 g5874.t1                                                                 |   |              |   |                | DDE superfamily endonuclease, CENP-B-like; HTH CenpB-type DNA-binding domain                                                     | 6  | 6  |  |  |
| 649 | 6  | 6  | g167.t1 g2941.t1 g2971.t1 g32.t1 g4848.t1 g58.t1                                                                    |   |              |   |                |                                                                                                                                  | 6  | 6  |  |  |
| 650 | 5  | 5  | g2310.t1 g3059.t1 g46.t1 g5275.t1 g856.t1                                                                           |   |              |   |                |                                                                                                                                  | 5  | 5  |  |  |
| 651 | 4  | 4  | g3822.t1 g3823.t1 g3824.t1 g3825.t1                                                                                 |   |              |   |                | Flocculin type 3 repeat; Cytadhesin P30P32                                                                                       | 4  | 4  |  |  |
| 652 | 4  | 4  | g1291.t1 g3758.t1 g4854.t1 g883.t                                                                                   |   |              |   |                |                                                                                                                                  | 4  | 4  |  |  |
| 653 | 4  | 4  | g1811.t1 g1821.t1 g1828.t1 g1829.t1                                                                                 |   |              |   |                |                                                                                                                                  | 4  | 4  |  |  |
| 654 | 3  | 3  | g4914.t1 g66.t1 g67.t1                                                                                              |   |              |   |                | Retrotransposon gag protein                                                                                                      | 3  | 3  |  |  |
| 655 | 3  | 3  | g2147.t1 g3136.t1 g321.t1                                                                                           |   |              |   |                | Peptidase S10, serine carboxypeptidase, active site; Peptidase S10, serine carboxypeptidase                                      | 3  | 3  |  |  |
| 656 | 3  | 3  | g4287.t1 g4288.t1 g4292.t1                                                                                          |   |              |   |                |                                                                                                                                  | 3  | 3  |  |  |
| 657 | 3  | 3  | g1753.t1 g1790.t1 g4881.t1                                                                                          |   |              |   |                | PT repeat                                                                                                                        | 3  | 3  |  |  |
| 658 | 3  | 3  | g26.t1 g3112.t1 g3114.t1                                                                                            |   |              |   |                | CDR ABC transporter                                                                                                              | 3  | 3  |  |  |
| 659 | 3  | 3  | g2200.t1 g2201.t1 g4004.t1                                                                                          |   |              |   |                |                                                                                                                                  | 3  | 3  |  |  |
| 660 | 3  | 3  | g4068.t1 g4323.t2 g637.t1                                                                                           |   |              |   |                |                                                                                                                                  | 3  | 3  |  |  |
| 661 | 3  | 3  | g3036.t1 g3054.t1 g4.t1                                                                                             |   |              |   |                | Peptidase A1; Peptidase aspartic; Peptidase aspartic, catalytic                                                                  | 3  | 3  |  |  |
| 662 | 3  | 3  | g1726.t1 g1767.t1 g1778.t1                                                                                          |   |              |   |                |                                                                                                                                  | 3  | 3  |  |  |
| 663 | 3  | 3  | g1295.t1 g3703.t1 g3796.t1                                                                                          |   |              |   |                |                                                                                                                                  | 3  | 3  |  |  |
| 664 | 2  | 2  | g4164.t1 g4169.t1                                                                                                   |   |              |   |                | Adhesion domain, bacterial; Agglutinin-like protein, N-terminal                                                                  | 2  | 2  |  |  |
| 665 | 2  | 2  | g446.t1 g450.t1                                                                                                     |   |              |   |                |                                                                                                                                  | 2  | 2  |  |  |
| 666 | 2  | 2  | g671.t1 g679.t1                                                                                                     |   |              |   |                |                                                                                                                                  | 2  | 2  |  |  |
| 667 | 2  | 2  | g1311.t1 g4872.t1                                                                                                   |   |              |   |                |                                                                                                                                  | 2  | 2  |  |  |
| 668 | 2  | 2  | g1278.t1 g350.t                                                                                                     |   |              |   |                |                                                                                                                                  | 2  | 2  |  |  |
| 669 | 2  | 2  | g1.t1 g4866.t1                                                                                                      |   |              |   |                |                                                                                                                                  | 2  | 2  |  |  |
| 670 | 2  | 2  | g4100.t1 g4477.t1                                                                                                   |   |              |   |                |                                                                                                                                  | 2  | 2  |  |  |
| 671 | 2  | 2  | g5015.t1 g5022.t1                                                                                                   |   |              |   |                |                                                                                                                                  | 2  | 2  |  |  |
| 672 | 2  | 2  | g2076.t1 g4481.t1                                                                                                   |   |              |   |                |                                                                                                                                  | 2  | 2  |  |  |
| 673 | 2  | 2  | g1638.t1 g783.t                                                                                                     |   |              |   |                | F-box domain, cyclin-like                                                                                                        | 2  | 2  |  |  |
| 674 | 2  | 2  | g903.t1 g922.t1                                                                                                     |   |              |   |                |                                                                                                                                  | 2  | 2  |  |  |
| 675 | 2  | 2  | g1614.t1 g5916.t1                                                                                                   |   |              |   |                |                                                                                                                                  | 2  | 2  |  |  |

|     |   |   |                   |  |  |  |                                                                                                                  |  |   |   |
|-----|---|---|-------------------|--|--|--|------------------------------------------------------------------------------------------------------------------|--|---|---|
| 676 | 2 | 2 | g361.t1 g63.t2    |  |  |  |                                                                                                                  |  | 2 | 2 |
| 677 | 2 | 2 | g1706.t1 g1707.t1 |  |  |  | Peptidase A1; Peptidase aspartic; Peptidase aspartic, catalytic                                                  |  | 2 | 2 |
| 678 | 2 | 2 | g1583.t1 g1584.t1 |  |  |  | Leucine-rich repeat; Leucine rich repeat 4                                                                       |  | 2 | 2 |
| 679 | 2 | 2 | g3056.t1 g9.t1    |  |  |  |                                                                                                                  |  | 2 | 2 |
| 680 | 2 | 2 | g2918.t1 g3073.t1 |  |  |  |                                                                                                                  |  | 2 | 2 |
| 681 | 2 | 2 | g2.t1 g3052.t1    |  |  |  | Nucleotide-binding, alpha-beta plait                                                                             |  | 2 | 2 |
| 682 | 2 | 2 | g2077.t1 g4482.t1 |  |  |  |                                                                                                                  |  | 2 | 2 |
| 683 | 2 | 2 | g2764.t1 g3883.t1 |  |  |  |                                                                                                                  |  | 2 | 2 |
| 684 | 2 | 2 | g2199.t1 g4005.t1 |  |  |  | F-box domain, cyclin-like                                                                                        |  | 2 | 2 |
| 685 | 2 | 2 | g1639.t1 g1650.t1 |  |  |  |                                                                                                                  |  | 2 | 2 |
| 686 | 2 | 2 | g1073.t1 g1075.t1 |  |  |  |                                                                                                                  |  | 2 | 2 |
| 687 | 1 | 1 | g4346.t1          |  |  |  |                                                                                                                  |  | 1 | 1 |
| 688 | 1 | 1 | g5215.t1          |  |  |  |                                                                                                                  |  | 1 | 1 |
| 689 | 1 | 1 | g520.t1           |  |  |  |                                                                                                                  |  | 1 | 1 |
| 690 | 1 | 1 | g347.t1           |  |  |  |                                                                                                                  |  | 1 | 1 |
| 691 | 1 | 1 | g5353.t1          |  |  |  |                                                                                                                  |  | 1 | 1 |
| 692 | 1 | 1 | g4104.t1          |  |  |  |                                                                                                                  |  | 1 | 1 |
| 693 | 1 | 1 | g4753.t1          |  |  |  |                                                                                                                  |  | 1 | 1 |
| 694 | 1 | 1 | g1126.t1          |  |  |  |                                                                                                                  |  | 1 | 1 |
| 695 | 1 | 1 | g377.t1           |  |  |  | DDE superfamily endonuclease, CENP-B-like                                                                        |  | 1 | 1 |
| 696 | 1 | 1 | g4407.t1          |  |  |  | Leucine-rich repeat; Leucine rich repeat 4                                                                       |  | 1 | 1 |
| 697 | 1 | 1 | g4063.t2          |  |  |  | Leucine-rich repeat                                                                                              |  | 1 | 1 |
| 698 | 1 | 1 | g5951.t1          |  |  |  |                                                                                                                  |  | 1 | 1 |
| 699 | 1 | 1 | g3719.t1          |  |  |  |                                                                                                                  |  | 1 | 1 |
| 700 | 1 | 1 | g76.t1            |  |  |  |                                                                                                                  |  | 1 | 1 |
| 701 | 1 | 1 | g21.t1            |  |  |  | Capsid/spike protein, ssDNA virus; Major spike protein G; Microvirus H protein (pilot protein); Capsid protein F |  | 1 | 1 |
| 702 | 1 | 1 | g1230.t1          |  |  |  |                                                                                                                  |  | 1 | 1 |
| 703 | 1 | 1 | g4040.t1          |  |  |  |                                                                                                                  |  | 1 | 1 |
| 704 | 1 | 1 | g2398.t1          |  |  |  |                                                                                                                  |  | 1 | 1 |
| 705 | 1 | 1 | g590.t1           |  |  |  |                                                                                                                  |  | 1 | 1 |
| 706 | 1 | 1 | g2451.t1          |  |  |  | F-box domain, cyclin-like                                                                                        |  | 1 | 1 |
| 707 | 1 | 1 | g1491.t1          |  |  |  |                                                                                                                  |  | 1 | 1 |
| 708 | 1 | 1 | g2761.t1          |  |  |  | Small ubiquitin-related modifier, SUMO                                                                           |  | 1 | 1 |
| 709 | 1 | 1 | g2452.t1          |  |  |  |                                                                                                                  |  | 1 | 1 |
| 710 | 1 | 1 | g2809.t1          |  |  |  | Kinetochores subunit NKP2                                                                                        |  | 1 | 1 |
| 711 | 1 | 1 | g3412.t1          |  |  |  |                                                                                                                  |  | 1 | 1 |
| 712 | 1 | 1 | g322.t1           |  |  |  |                                                                                                                  |  | 1 | 1 |
| 713 | 1 | 1 | g68.t1            |  |  |  | Reverse transcriptase                                                                                            |  | 1 | 1 |
| 714 | 1 | 1 | g4853.t1          |  |  |  |                                                                                                                  |  | 1 | 1 |
| 715 | 1 | 1 | g383.t1           |  |  |  |                                                                                                                  |  | 1 | 1 |
| 716 | 1 | 1 | g429.t1           |  |  |  |                                                                                                                  |  | 1 | 1 |
| 717 | 1 | 1 | g4147.t1          |  |  |  |                                                                                                                  |  | 1 | 1 |
| 718 | 1 | 1 | g789.t1           |  |  |  | Zn(2)-C6 fungal-type DNA-binding domain                                                                          |  | 1 | 1 |
| 719 | 1 | 1 | g5211.t1          |  |  |  |                                                                                                                  |  | 1 | 1 |
| 720 | 1 | 1 | g5021.t1          |  |  |  | Ribonuclease H-like domain                                                                                       |  | 1 | 1 |
| 721 | 1 | 1 | g1477.t1          |  |  |  |                                                                                                                  |  | 1 | 1 |
| 722 | 1 | 1 | g4037.t1          |  |  |  |                                                                                                                  |  | 1 | 1 |
| 723 | 1 | 1 | g5608.t1          |  |  |  | PINIT domain; DNA-binding SAP; Zinc finger, MIZ-type                                                             |  | 1 | 1 |
| 724 | 1 | 1 | g4941.t1          |  |  |  |                                                                                                                  |  | 1 | 1 |
| 725 | 1 | 1 | g5527.t1          |  |  |  | Spo11/DNA topoisomerase VI, subunit A                                                                            |  | 1 | 1 |
| 726 | 1 | 1 | g4368.t1          |  |  |  |                                                                                                                  |  | 1 | 1 |
| 727 | 1 | 1 | g684.t1           |  |  |  |                                                                                                                  |  | 1 | 1 |



|     |   |   |          |  |  |  |  |                                                                                                            |  |   |   |  |
|-----|---|---|----------|--|--|--|--|------------------------------------------------------------------------------------------------------------|--|---|---|--|
| 780 | 1 | 1 | g2104.t1 |  |  |  |  |                                                                                                            |  | 1 | 1 |  |
| 781 | 1 | 1 | g1704.t1 |  |  |  |  |                                                                                                            |  | 1 | 1 |  |
| 782 | 1 | 1 | g519.t1  |  |  |  |  |                                                                                                            |  | 1 | 1 |  |
| 783 | 1 | 1 | g1195.t1 |  |  |  |  |                                                                                                            |  | 1 | 1 |  |
| 784 | 1 | 1 | g1287.t1 |  |  |  |  |                                                                                                            |  | 1 | 1 |  |
| 785 | 1 | 1 | g5060.t1 |  |  |  |  |                                                                                                            |  | 1 | 1 |  |
| 786 | 1 | 1 | g3133.t1 |  |  |  |  |                                                                                                            |  | 1 | 1 |  |
| 787 | 1 | 1 | g2649.t1 |  |  |  |  | RNA recognition motif domain; Nucleotide-binding, alpha-beta plait                                         |  | 1 | 1 |  |
| 788 | 1 | 1 | g5019.t1 |  |  |  |  |                                                                                                            |  | 1 | 1 |  |
| 789 | 1 | 1 | g540.t1  |  |  |  |  | Hyphally-regulated cell wall protein, N-terminal                                                           |  | 1 | 1 |  |
| 790 | 1 | 1 | g1629.t1 |  |  |  |  |                                                                                                            |  | 1 | 1 |  |
| 791 | 1 | 1 | g3134.t1 |  |  |  |  |                                                                                                            |  | 1 | 1 |  |
| 792 | 1 | 1 | g4896.t1 |  |  |  |  |                                                                                                            |  | 1 | 1 |  |
| 793 | 1 | 1 | g1633.t1 |  |  |  |  |                                                                                                            |  | 1 | 1 |  |
| 794 | 1 | 1 | g4178.t1 |  |  |  |  |                                                                                                            |  | 1 | 1 |  |
| 795 | 1 | 1 | g2681.t1 |  |  |  |  | HTH CnpB-type DNA-binding domain                                                                           |  | 1 | 1 |  |
| 796 | 1 | 1 | g3101.t1 |  |  |  |  |                                                                                                            |  | 1 | 1 |  |
| 797 | 1 | 1 | g1712.t1 |  |  |  |  |                                                                                                            |  | 1 | 1 |  |
| 798 | 1 | 1 | g5731.t1 |  |  |  |  |                                                                                                            |  | 1 | 1 |  |
| 799 | 1 | 1 | g1601.t1 |  |  |  |  |                                                                                                            |  | 1 | 1 |  |
| 800 | 1 | 1 | g1581.t1 |  |  |  |  |                                                                                                            |  | 1 | 1 |  |
| 801 | 1 | 1 | g3631.t1 |  |  |  |  |                                                                                                            |  | 1 | 1 |  |
| 802 | 1 | 1 | g4930.t1 |  |  |  |  |                                                                                                            |  | 1 | 1 |  |
| 803 | 1 | 1 | g1546.t1 |  |  |  |  |                                                                                                            |  | 1 | 1 |  |
| 804 | 1 | 1 | g3551.t1 |  |  |  |  |                                                                                                            |  | 1 | 1 |  |
| 805 | 1 | 1 | g5020.t1 |  |  |  |  |                                                                                                            |  | 1 | 1 |  |
| 806 | 1 | 1 | g22.t1   |  |  |  |  | C-protein; Replication gene A protein                                                                      |  | 1 | 1 |  |
| 807 | 1 | 1 | g3632.t1 |  |  |  |  |                                                                                                            |  | 1 | 1 |  |
| 808 | 1 | 1 | g3701.t1 |  |  |  |  |                                                                                                            |  | 1 | 1 |  |
| 809 | 1 | 1 | g1334.t1 |  |  |  |  |                                                                                                            |  | 1 | 1 |  |
| 810 | 1 | 1 | g4184.t1 |  |  |  |  |                                                                                                            |  | 1 | 1 |  |
| 811 | 1 | 1 | g5819.t1 |  |  |  |  | Kinetochore Sim4 complex subunit Fta4                                                                      |  | 1 | 1 |  |
| 812 | 1 | 1 | g4556.t1 |  |  |  |  |                                                                                                            |  | 1 | 1 |  |
| 813 | 1 | 1 | g5913.t1 |  |  |  |  |                                                                                                            |  | 1 | 1 |  |
| 814 | 1 | 1 | g2559.t1 |  |  |  |  |                                                                                                            |  | 1 | 1 |  |
| 815 | 1 | 1 | g5154.t1 |  |  |  |  |                                                                                                            |  | 1 | 1 |  |
| 816 | 1 | 1 | g3923.t1 |  |  |  |  |                                                                                                            |  | 1 | 1 |  |
| 817 | 1 | 1 | g445.t1  |  |  |  |  |                                                                                                            |  | 1 | 1 |  |
| 818 | 1 | 1 | g5658.t1 |  |  |  |  |                                                                                                            |  | 1 | 1 |  |
| 819 | 1 | 1 | g884.t1  |  |  |  |  |                                                                                                            |  | 1 | 1 |  |
| 820 | 1 | 1 | g1263.t1 |  |  |  |  |                                                                                                            |  | 1 | 1 |  |
| 821 | 1 | 1 | g2237.t1 |  |  |  |  | Amidohydrolase 2                                                                                           |  | 1 | 1 |  |
| 822 | 1 | 1 | g5213.t1 |  |  |  |  |                                                                                                            |  | 1 | 1 |  |
| 823 | 1 | 1 | g449.t1  |  |  |  |  |                                                                                                            |  | 1 | 1 |  |
| 824 | 1 | 1 | g1183.t1 |  |  |  |  |                                                                                                            |  | 1 | 1 |  |
| 825 | 1 | 1 | g5646.t1 |  |  |  |  |                                                                                                            |  | 1 | 1 |  |
| 826 | 1 | 1 | g3832.t1 |  |  |  |  |                                                                                                            |  | 1 | 1 |  |
| 827 | 1 | 1 | g5577.t1 |  |  |  |  |                                                                                                            |  | 1 | 1 |  |
| 828 | 1 | 1 | g3952.t1 |  |  |  |  |                                                                                                            |  | 1 | 1 |  |
| 829 | 1 | 1 | g64.t1   |  |  |  |  | Reverse transcriptase; Integrase, catalytic core; Ribonuclease H-like domain; Retroviral aspartyl protease |  | 1 | 1 |  |
| 830 | 1 | 1 | g5208.t1 |  |  |  |  |                                                                                                            |  | 1 | 1 |  |
| 831 | 1 | 1 | g4074.t1 |  |  |  |  |                                                                                                            |  | 1 | 1 |  |





|     |   |  |   |              |  |                                                                 |   |    |  |
|-----|---|--|---|--------------|--|-----------------------------------------------------------------|---|----|--|
| 884 | 1 |  | 1 | CORT_0A00590 |  |                                                                 | 0 | -1 |  |
| 885 | 1 |  | 1 | CORT_0A00260 |  |                                                                 | 0 | -1 |  |
| 886 | 1 |  | 1 | CORT_0A06530 |  |                                                                 | 0 | -1 |  |
| 887 | 1 |  | 1 | CORT_0E02060 |  |                                                                 | 0 | -1 |  |
| 888 | 1 |  | 1 | CORT_0G01280 |  |                                                                 | 0 | -1 |  |
| 889 | 1 |  | 1 | CORT_0A03610 |  |                                                                 | 0 | -1 |  |
| 890 | 1 |  | 1 | CORT_0B00100 |  |                                                                 | 0 | -1 |  |
| 891 | 1 |  | 1 | CORT_0B01680 |  |                                                                 | 0 | -1 |  |
| 892 | 1 |  | 1 | CORT_0C02730 |  |                                                                 | 0 | -1 |  |
| 893 | 1 |  | 1 | CORT_0A01815 |  |                                                                 | 0 | -1 |  |
| 894 | 1 |  | 1 | CORT_0B05350 |  |                                                                 | 0 | -1 |  |
| 895 | 1 |  | 1 | CORT_0C02520 |  | Flocculin type 3 repeat                                         | 0 | -1 |  |
| 896 | 1 |  | 1 | CORT_0E04960 |  |                                                                 | 0 | -1 |  |
| 897 | 1 |  | 1 | CORT_0B09980 |  |                                                                 | 0 | -1 |  |
| 898 | 1 |  | 1 | CORT_0F01640 |  |                                                                 | 0 | -1 |  |
| 899 | 1 |  | 1 | CORT_0H02250 |  | F-box domain, cyclin-like                                       | 0 | -1 |  |
| 900 | 1 |  | 1 | CORT_0D07670 |  | Leucine-rich repeat; Leucine rich repeat 4                      | 0 | -1 |  |
| 901 | 1 |  | 1 | CORT_0G00710 |  |                                                                 | 0 | -1 |  |
| 902 | 1 |  | 1 | CORT_0B03430 |  |                                                                 | 0 | -1 |  |
| 903 | 1 |  | 1 | CORT_0B03310 |  |                                                                 | 0 | -1 |  |
| 904 | 1 |  | 1 | CORT_0F01610 |  | Histone H5                                                      | 0 | -1 |  |
| 905 | 1 |  | 1 | CORT_0H02500 |  |                                                                 | 0 | -1 |  |
| 906 | 1 |  | 1 | CORT_0F01920 |  |                                                                 | 0 | -1 |  |
| 907 | 1 |  | 1 | CORT_0A09810 |  | CsbD-like                                                       | 0 | -1 |  |
| 908 | 1 |  | 1 | CORT_0E00600 |  |                                                                 | 0 | -1 |  |
| 909 | 1 |  | 1 | CORT_0A09590 |  |                                                                 | 0 | -1 |  |
| 910 | 1 |  | 1 | CORT_0G03240 |  |                                                                 | 0 | -1 |  |
| 911 | 1 |  | 1 | CORT_0B08430 |  |                                                                 | 0 | -1 |  |
| 912 | 1 |  | 1 | CORT_0E04130 |  |                                                                 | 0 | -1 |  |
| 913 | 1 |  | 1 | CORT_0E03960 |  |                                                                 | 0 | -1 |  |
| 914 | 1 |  | 1 | CORT_0D04940 |  | Cyclin PHO80-like                                               | 0 | -1 |  |
| 915 | 1 |  | 1 | CORT_0C01560 |  | Kinetochore Sim4 complex subunit Fta4                           | 0 | -1 |  |
| 916 | 1 |  | 1 | CORT_0G04490 |  |                                                                 | 0 | -1 |  |
| 917 | 1 |  | 1 | CORT_0A04770 |  |                                                                 | 0 | -1 |  |
| 918 | 1 |  | 1 | CORT_0B05520 |  |                                                                 | 0 | -1 |  |
| 919 | 1 |  | 1 | CORT_0E00990 |  |                                                                 | 0 | -1 |  |
| 920 | 1 |  | 1 | CORT_0D06240 |  |                                                                 | 0 | -1 |  |
| 921 | 1 |  | 1 | CORT_0B02710 |  |                                                                 | 0 | -1 |  |
| 922 | 1 |  | 1 | CORT_0A04610 |  |                                                                 | 0 | -1 |  |
| 923 | 1 |  | 1 | CORT_0G04160 |  |                                                                 | 0 | -1 |  |
| 924 | 1 |  | 1 | CORT_0E05330 |  |                                                                 | 0 | -1 |  |
| 925 | 1 |  | 1 | CORT_0A11960 |  |                                                                 | 0 | -1 |  |
| 926 | 1 |  | 1 | CORT_0E02550 |  |                                                                 | 0 | -1 |  |
| 927 | 1 |  | 1 | CORT_0E03800 |  |                                                                 | 0 | -1 |  |
| 928 | 1 |  | 1 | CORT_0A01530 |  | Leucine-rich repeat                                             | 0 | -1 |  |
| 929 | 1 |  | 1 | CORT_0A08100 |  |                                                                 | 0 | -1 |  |
| 930 | 1 |  | 1 | CORT_0E04810 |  | Peptidase aspartic, catalytic; Peptidase aspartic; Peptidase A1 | 0 | -1 |  |
| 931 | 1 |  | 1 | CORT_0G00560 |  |                                                                 | 0 | -1 |  |
| 932 | 1 |  | 1 | CORT_0F01980 |  | Bul1, N-terminal; Bul1, C-terminal                              | 0 | -1 |  |
| 933 | 1 |  | 1 | CORT_0F00120 |  | Leucine-rich repeat; Leucine rich repeat 4                      | 0 | -1 |  |
| 934 | 1 |  | 1 | CORT_0G03250 |  |                                                                 | 0 | -1 |  |
| 935 | 1 |  | 1 | CORT_0B09290 |  |                                                                 | 0 | -1 |  |

|     |   |  |   |              |   |                                                                                                           |  |    |    |  |
|-----|---|--|---|--------------|---|-----------------------------------------------------------------------------------------------------------|--|----|----|--|
| 936 | 1 |  | 1 | CORT_0E00450 |   |                                                                                                           |  | 0  | -1 |  |
| 937 | 1 |  | 1 | CORT_0B01480 |   |                                                                                                           |  | 0  | -1 |  |
| 938 | 1 |  | 1 | CORT_0A09480 |   |                                                                                                           |  | 0  | -1 |  |
| 939 | 1 |  | 1 | CORT_0D05000 |   |                                                                                                           |  | 0  | -1 |  |
| 940 | 1 |  | 1 | CORT_0G01580 |   |                                                                                                           |  | 0  | -1 |  |
| 941 | 1 |  | 1 | CORT_0E02540 |   |                                                                                                           |  | 0  | -1 |  |
| 942 | 1 |  | 1 | CORT_0B07780 |   |                                                                                                           |  | 0  | -1 |  |
| 943 | 1 |  | 1 | CORT_0G02670 |   |                                                                                                           |  | 0  | -1 |  |
| 944 | 1 |  | 1 | CORT_0G04500 |   |                                                                                                           |  | 0  | -1 |  |
| 945 | 1 |  | 1 | CORT_0B10915 |   |                                                                                                           |  | 0  | -1 |  |
| 946 | 1 |  | 1 | CORT_0E04255 |   |                                                                                                           |  | 0  | -1 |  |
| 947 | 1 |  | 1 | CORT_0G03550 |   |                                                                                                           |  | 0  | -1 |  |
| 948 | 1 |  | 1 | CORT_0A09490 |   |                                                                                                           |  | 0  | -1 |  |
| 949 | 1 |  | 1 | CORT_0C00110 |   |                                                                                                           |  | 0  | -1 |  |
| 950 | 1 |  | 1 | CORT_0E02050 |   |                                                                                                           |  | 0  | -1 |  |
| 951 | 1 |  | 1 | CORT_0B10410 |   | PINIT domain; Zinc finger, MIZ-type                                                                       |  | 0  | -1 |  |
| 952 | 1 |  | 1 | CORT_0E04970 |   |                                                                                                           |  | 0  | -1 |  |
| 953 | 1 |  | 1 | CORT_0G01550 |   |                                                                                                           |  | 0  | -1 |  |
| 954 | 1 |  | 1 | CORT_0H02260 |   |                                                                                                           |  | 0  | -1 |  |
| 955 | 1 |  | 1 | CORT_0C01130 |   |                                                                                                           |  | 0  | -1 |  |
| 956 | 1 |  | 1 | CORT_0G02180 |   |                                                                                                           |  | 0  | -1 |  |
| 957 | 1 |  | 1 | CORT_0G02850 |   |                                                                                                           |  | 0  | -1 |  |
| 958 | 1 |  | 1 | CORT_0A03280 |   |                                                                                                           |  | 0  | -1 |  |
| 959 | 1 |  | 1 | CORT_0E00250 |   |                                                                                                           |  | 0  | -1 |  |
| 960 | 1 |  | 1 | CORT_0C03590 |   |                                                                                                           |  | 0  | -1 |  |
| 961 | 1 |  | 1 | CORT_0E06020 |   |                                                                                                           |  | 0  | -1 |  |
| 962 | 1 |  | 1 | CORT_0A08340 |   |                                                                                                           |  | 0  | -1 |  |
| 963 | 1 |  | 1 | CORT_0A09150 |   | RNA polymerase II, large subunit, CTD; ENTH/VHS                                                           |  | 0  | -1 |  |
| 964 | 1 |  | 1 | CORT_0D01700 |   |                                                                                                           |  | 0  | -1 |  |
| 965 | 1 |  | 1 | CORT_0G04060 |   | Leucine-rich repeat; Leucine rich repeat 4                                                                |  | 0  | -1 |  |
| 966 | 1 |  | 1 | CORT_0A12370 |   |                                                                                                           |  | 0  | -1 |  |
| 967 | 1 |  | 1 | CORT_0B02810 |   |                                                                                                           |  | 0  | -1 |  |
| 968 | 1 |  | 1 | CORT_0E01870 |   |                                                                                                           |  | 0  | -1 |  |
| 969 | 1 |  | 1 | CORT_0B02850 |   |                                                                                                           |  | 0  | -1 |  |
| 970 | 1 |  | 1 | CORT_0H02030 |   |                                                                                                           |  | 0  | -1 |  |
| 971 | 1 |  | 1 | CORT_0G03640 |   |                                                                                                           |  | 0  | -1 |  |
| 972 | 1 |  | 1 | CORT_0B09880 |   |                                                                                                           |  | 0  | -1 |  |
| 973 | 1 |  | 1 | CORT_0B08880 |   | SMAD/FHA domain; Forkhead-associated (FHA) domain                                                         |  | 0  | -1 |  |
| 974 | 1 |  | 1 | CORT_0H02530 |   |                                                                                                           |  | 0  | -1 |  |
| 975 | 4 |  |   |              | 4 | CPAR2_101640 CPAR2_301590 CPAR2_502600 CPAR2_600970                                                       |  | -4 | 0  |  |
| 976 | 2 |  |   |              | 2 | CPAR2_101780 CPAR2_600920                                                                                 |  | -2 | 0  |  |
| 977 | 2 |  |   |              | 2 | CPAR2_502970 CPAR2_702490                                                                                 |  | -2 | 0  |  |
| 978 | 2 |  |   |              | 2 | CPAR2_108120 CPAR2_109110                                                                                 |  | -2 | 0  |  |
| 979 | 2 |  |   |              | 2 | CPAR2_100840 Nucleotide-binding, alpha-beta plait                                                         |  | -2 | 0  |  |
| 980 | 2 |  |   |              | 2 | CPAR2_808310 CPAR2_808320                                                                                 |  | -2 | 0  |  |
| 981 | 2 |  |   |              | 2 | CapaffMp06.1 Ca Reverse transcriptase; HNH endonuclease; Group II intron, maturase-specific; HNH nuclease |  | -2 | 0  |  |
| 982 | 2 |  |   |              | 2 | CPAR2_200530 CPAR2_806630                                                                                 |  | -2 | 0  |  |
| 983 | 2 |  |   |              | 2 | CPAR2_400260 CPAR2_400370                                                                                 |  | -2 | 0  |  |
| 984 | 2 |  |   |              | 2 | CPAR2_101890 CPAR2_302130                                                                                 |  | -2 | 0  |  |
| 985 | 2 |  |   |              | 2 | CPAR2_502550 CPAR2_502640                                                                                 |  | -2 | 0  |  |
| 986 | 1 |  |   |              | 1 | CPAR2_803190                                                                                              |  | -1 | 0  |  |
| 987 | 1 |  |   |              | 1 | CPAR2_503010                                                                                              |  | -1 | 0  |  |

|      |   |  |  |  |   |                |                                                                                                                                         |    |   |  |
|------|---|--|--|--|---|----------------|-----------------------------------------------------------------------------------------------------------------------------------------|----|---|--|
| 988  | 1 |  |  |  | 1 | CPAR2_703370   |                                                                                                                                         | -1 | 0 |  |
| 989  | 1 |  |  |  | 1 | CPAR2_701380   |                                                                                                                                         | -1 | 0 |  |
| 990  | 1 |  |  |  | 1 | CPAR2_600990   |                                                                                                                                         | -1 | 0 |  |
| 991  | 1 |  |  |  | 1 | CPAR2_109320   | PINIT domain; Zinc finger, MIZ-type                                                                                                     | -1 | 0 |  |
| 992  | 1 |  |  |  | 1 | CPAR2_100950   |                                                                                                                                         | -1 | 0 |  |
| 993  | 1 |  |  |  | 1 | CPAR2_503280   |                                                                                                                                         | -1 | 0 |  |
| 994  | 1 |  |  |  | 1 | CPAR2_301870   |                                                                                                                                         | -1 | 0 |  |
| 995  | 1 |  |  |  | 1 | CPAR2_802450   |                                                                                                                                         | -1 | 0 |  |
| 996  | 1 |  |  |  | 1 | CPAR2_103320   |                                                                                                                                         | -1 | 0 |  |
| 997  | 1 |  |  |  | 1 | CPAR2_402020   |                                                                                                                                         | -1 | 0 |  |
| 998  | 1 |  |  |  | 1 | CapafMp03.2    | LAGLIDADG DNA endonuclease                                                                                                              | -1 | 0 |  |
| 999  | 1 |  |  |  | 1 | CPAR2_302810   |                                                                                                                                         | -1 | 0 |  |
| 1000 | 1 |  |  |  | 1 | CPAR2_104135   |                                                                                                                                         | -1 | 0 |  |
| 1001 | 1 |  |  |  | 1 | CPAR2_212640   |                                                                                                                                         | -1 | 0 |  |
| 1002 | 1 |  |  |  | 1 | CPAR2_600290   |                                                                                                                                         | -1 | 0 |  |
| 1003 | 1 |  |  |  | 1 | CPAR2_213890   |                                                                                                                                         | -1 | 0 |  |
| 1004 | 1 |  |  |  | 1 | CPAR2_402590   |                                                                                                                                         | -1 | 0 |  |
| 1005 | 1 |  |  |  | 1 | CPAR2_600940   | Bul1, N-terminal; Bul1, C-terminal                                                                                                      | -1 | 0 |  |
| 1006 | 1 |  |  |  | 1 | CapafMp05      | Copper centre Cu(A); Cytochrome c oxidase, subunit II; Cytochrome C oxidase subunit II-like, transmembrane domain; Cytochrome C oxidase | -1 | 0 |  |
| 1007 | 1 |  |  |  | 1 | CapafMp17      | ATPase, F0 complex, subunit A; ATPase, F0 complex, subunit A, active site                                                               | -1 | 0 |  |
| 1008 | 1 |  |  |  | 1 | CapafMp09      | NADH:ubiquinone oxidoreductase, chain 4, N-terminal; NADH:ubiquinone/plastoquinone oxidoreductase; NADH-quinone oxidoreductase, chain   | -1 | 0 |  |
| 1009 | 1 |  |  |  | 1 | CPAR2_502730   |                                                                                                                                         | -1 | 0 |  |
| 1010 | 1 |  |  |  | 1 | CPAR2_808630   |                                                                                                                                         | -1 | 0 |  |
| 1011 | 1 |  |  |  | 1 | CPAR2_602030   |                                                                                                                                         | -1 | 0 |  |
| 1012 | 1 |  |  |  | 1 | CPAR2_402490   |                                                                                                                                         | -1 | 0 |  |
| 1013 | 1 |  |  |  | 1 | CPAR2_805180   |                                                                                                                                         | -1 | 0 |  |
| 1014 | 1 |  |  |  | 1 | CPAR2_800140   |                                                                                                                                         | -1 | 0 |  |
| 1015 | 1 |  |  |  | 1 | CapafMp03.1    | Intron endonuclease, group I; UvrABC system subunit C, N-terminal                                                                       | -1 | 0 |  |
| 1016 | 1 |  |  |  | 1 | CPAR2_213060   |                                                                                                                                         | -1 | 0 |  |
| 1017 | 1 |  |  |  | 1 | CPAR2_303600   |                                                                                                                                         | -1 | 0 |  |
| 1018 | 1 |  |  |  | 1 | CPAR2_301890   |                                                                                                                                         | -1 | 0 |  |
| 1019 | 1 |  |  |  | 1 | CPAR2_503640   |                                                                                                                                         | -1 | 0 |  |
| 1020 | 1 |  |  |  | 1 | CPAR2_207870   |                                                                                                                                         | -1 | 0 |  |
| 1021 | 1 |  |  |  | 1 | CPAR2_702570   |                                                                                                                                         | -1 | 0 |  |
| 1022 | 1 |  |  |  | 1 | CPAR2_702470   |                                                                                                                                         | -1 | 0 |  |
| 1023 | 1 |  |  |  | 1 | CPAR2_807580   | Kinetochore Sim4 complex subunit Fta4                                                                                                   | -1 | 0 |  |
| 1024 | 1 |  |  |  | 1 | CPAR2_703890   |                                                                                                                                         | -1 | 0 |  |
| 1025 | 1 |  |  |  | 1 | CPAR2_212630   |                                                                                                                                         | -1 | 0 |  |
| 1026 | 1 |  |  |  | 1 | CPAR2_102340   |                                                                                                                                         | -1 | 0 |  |
| 1027 | 1 |  |  |  | 1 | CPAR2_212990   |                                                                                                                                         | -1 | 0 |  |
| 1028 | 1 |  |  |  | 1 | CPAR2_102380   | DDE superfamily endonuclease, CENP-B-like                                                                                               | -1 | 0 |  |
| 1029 | 1 |  |  |  | 1 | CPAR2_800500   |                                                                                                                                         | -1 | 0 |  |
| 1030 | 1 |  |  |  | 1 | CapafMp03      | Di-haem cytochrome, transmembrane; Cytochrome b/b6, C-terminal; Cytochrome b/b6, N-terminal; Cytochrome b/b6                            | -1 | 0 |  |
| 1031 | 1 |  |  |  | 1 | CPAR2_302720   |                                                                                                                                         | -1 | 0 |  |
| 1032 | 1 |  |  |  | 1 | CPAR2_702130   |                                                                                                                                         | -1 | 0 |  |
| 1033 | 1 |  |  |  | 1 | CPAR2_200020   | Leucine-rich repeat; Leucine-rich repeat, typical subtype                                                                               | -1 | 0 |  |
| 1034 | 1 |  |  |  | 1 | CapafMp02      | NADH:ubiquinone/plastoquinone oxidoreductase                                                                                            | -1 | 0 |  |
| 1035 | 1 |  |  |  | 1 | CapafMp13      | Cytochrome c/ubiquinol oxidase subunit III; Cytochrome c oxidase, subunit III; Cytochrome c oxidase, subunit III, 4-helical bundle      | -1 | 0 |  |
| 1036 | 1 |  |  |  | 1 | CPAR2_204130.1 |                                                                                                                                         | -1 | 0 |  |
| 1037 | 1 |  |  |  | 1 | CPAR2_400950   |                                                                                                                                         | -1 | 0 |  |
| 1038 | 1 |  |  |  | 1 | CPAR2_209890   | RNA polymerase II, large subunit, CTD; ENTH/VHS                                                                                         | -1 | 0 |  |
| 1039 | 1 |  |  |  | 1 | CPAR2_205090   |                                                                                                                                         | -1 | 0 |  |

|      |   |  |  |  |   |              |                                                       |    |   |  |
|------|---|--|--|--|---|--------------|-------------------------------------------------------|----|---|--|
| 1040 | 1 |  |  |  | 1 | CPAR2_603650 |                                                       | -1 | 0 |  |
| 1041 | 1 |  |  |  | 1 | CPAR2_302820 |                                                       | -1 | 0 |  |
| 1042 | 1 |  |  |  | 1 | CapafMp01    | NADH:ubiquinone/plastoquinone oxidoreductase, chain 3 | -1 | 0 |  |
| 1043 | 1 |  |  |  | 1 | CPAR2_600010 | Leucine-rich repeat; Leucine rich repeat 4            | -1 | 0 |  |
| 1044 | 1 |  |  |  | 1 | CPAR2_600910 |                                                       | -1 | 0 |  |
| 1045 | 1 |  |  |  | 1 | CPAR2_101540 |                                                       | -1 | 0 |  |
| 1046 | 1 |  |  |  | 1 | CPAR2_211330 |                                                       | -1 | 0 |  |
| 1047 | 1 |  |  |  | 1 | CPAR2_803840 |                                                       | -1 | 0 |  |
| 1048 | 1 |  |  |  | 1 | CPAR2_106530 |                                                       | -1 | 0 |  |
| 1049 | 1 |  |  |  | 1 | CPAR2_503270 |                                                       | -1 | 0 |  |
| 1050 | 1 |  |  |  | 1 | CPAR2_704280 |                                                       | -1 | 0 |  |
| 1051 | 1 |  |  |  | 1 | CPAR2_700440 |                                                       | -1 | 0 |  |
| 1052 | 1 |  |  |  | 1 | CPAR2_808910 |                                                       | -1 | 0 |  |
| 1053 | 1 |  |  |  | 1 | CPAR2_102190 | Nucleolar protein Dnt1-like, N-terminal               | -1 | 0 |  |
| 1054 | 1 |  |  |  | 1 | CPAR2_208830 |                                                       | -1 | 0 |  |
| 1055 | 1 |  |  |  | 1 | CPAR2_203960 | DDE superfamily endonuclease, CENP-B-like             | -1 | 0 |  |
| 1056 | 1 |  |  |  | 1 | CPAR2_207660 | Kinetochore subunit NKP2                              | -1 | 0 |  |
| 1057 | 1 |  |  |  | 1 | CPAR2_600860 |                                                       | -1 | 0 |  |
| 1058 | 1 |  |  |  | 1 | CPAR2_701840 |                                                       | -1 | 0 |  |
| 1059 | 1 |  |  |  | 1 | CPAR2_213370 |                                                       | -1 | 0 |  |
| 1060 | 1 |  |  |  | 1 | CPAR2_208410 |                                                       | -1 | 0 |  |
| 1061 | 1 |  |  |  | 1 | CPAR2_206070 | Chromosome segregation protein Spc25                  | -1 | 0 |  |
| 1062 | 1 |  |  |  | 1 | CPAR2_103110 |                                                       | -1 | 0 |  |
| 1063 | 1 |  |  |  | 1 | CPAR2_805490 |                                                       | -1 | 0 |  |
| 1064 | 1 |  |  |  | 1 | CPAR2_102120 |                                                       | -1 | 0 |  |
| 1065 | 1 |  |  |  | 1 | CPAR2_808850 |                                                       | -1 | 0 |  |
| 1066 | 1 |  |  |  | 1 | CPAR2_501370 |                                                       | -1 | 0 |  |
| 1067 | 1 |  |  |  | 1 | CPAR2_101650 |                                                       | -1 | 0 |  |
| 1068 | 1 |  |  |  | 1 | CPAR2_206100 |                                                       | -1 | 0 |  |
| 1069 | 1 |  |  |  | 1 | CPAR2_109330 |                                                       | -1 | 0 |  |
| 1070 | 1 |  |  |  | 1 | CapafMp16    | ATPase, F0 complex, subunit 8, mitochondrial, fungal  | -1 | 0 |  |
| 1071 | 1 |  |  |  | 1 | CPAR2_303190 |                                                       | -1 | 0 |  |
| 1072 | 1 |  |  |  | 1 | CPAR2_804470 | Proline racemase                                      | -1 | 0 |  |
| 1073 | 1 |  |  |  | 1 | CPAR2_208330 |                                                       | -1 | 0 |  |
| 1074 | 1 |  |  |  | 1 | CPAR2_208820 |                                                       | -1 | 0 |  |
| 1075 | 1 |  |  |  | 1 | CapafMp11    | NADH:ubiquinone/plastoquinone oxidoreductase, chain 6 | -1 | 0 |  |
| 1076 | 1 |  |  |  | 1 | CPAR2_102010 |                                                       | -1 | 0 |  |
| 1077 | 1 |  |  |  | 1 | CapafMp14    | NADH-ubiquinone oxidoreductase chain 4L/K             | -1 | 0 |  |
| 1078 | 1 |  |  |  | 1 | CPAR2_701410 |                                                       | -1 | 0 |  |
| 1079 | 1 |  |  |  | 1 | CPAR2_702050 |                                                       | -1 | 0 |  |
| 1080 | 1 |  |  |  | 1 | CPAR2_500010 |                                                       | -1 | 0 |  |
| 1081 | 1 |  |  |  | 1 | CPAR2_503060 |                                                       | -1 | 0 |  |
| 1082 | 1 |  |  |  | 1 | CPAR2_205875 |                                                       | -1 | 0 |  |
| 1083 | 1 |  |  |  | 1 | CPAR2_703380 | Major coat protein, L-A virus                         | -1 | 0 |  |
| 1084 | 1 |  |  |  | 1 | CPAR2_212650 |                                                       | -1 | 0 |  |
| 1085 | 1 |  |  |  | 1 | CPAR2_204890 |                                                       | -1 | 0 |  |
| 1086 | 1 |  |  |  | 1 | CPAR2_703440 |                                                       | -1 | 0 |  |
| 1087 | 1 |  |  |  | 1 | CPAR2_102170 |                                                       | -1 | 0 |  |
| 1088 | 1 |  |  |  | 1 | CapafMp06.4  | Homing endonuclease, LAGLIDADG/HNH                    | -1 | 0 |  |
| 1089 | 1 |  |  |  | 1 | CPAR2_207790 |                                                       | -1 | 0 |  |
| 1090 | 1 |  |  |  | 1 | CPAR2_503700 |                                                       | -1 | 0 |  |
| 1091 | 1 |  |  |  | 1 | CPAR2_102020 |                                                       | -1 | 0 |  |

|      |   |  |  |  |   |              |                                                    |    |   |  |  |
|------|---|--|--|--|---|--------------|----------------------------------------------------|----|---|--|--|
| 1092 | 1 |  |  |  | 1 | CPAR2_206540 |                                                    | -1 | 0 |  |  |
| 1093 | 1 |  |  |  | 1 | Capaf1Mp06.3 | Homing endonuclease, LAGLIDADG/HNH                 | -1 | 0 |  |  |
| 1094 | 1 |  |  |  | 1 | CPAR2_212340 | CENP-A-nucleosome distal centromere subunit CENP-Q | -1 | 0 |  |  |
| 1095 | 1 |  |  |  | 1 | CPAR2_501530 |                                                    | -1 | 0 |  |  |
| 1096 | 1 |  |  |  | 1 | CPAR2_703900 |                                                    | -1 | 0 |  |  |
| 1097 | 1 |  |  |  | 1 | CPAR2_104360 |                                                    | -1 | 0 |  |  |
| 1098 | 1 |  |  |  | 1 | CPAR2_405110 |                                                    | -1 | 0 |  |  |
