# Supplementary material for: The Genomic Aftermath of Hybridization in the Opportunistic Pathogen Candida metapsilosis
Source: PubMed Central journal article supplement (PMC4627764; doi:10.1371/journal.pgen.1005626), 2015-10-30
Supplement: pgen.1005626.s020.pdf [file pgen.1005626.s020.pdf]

| Taxon Id | Species Name                                 | PhylomeDB proteome code | Source                    | Date       |
|----------|----------------------------------------------|-------------------------|---------------------------|------------|
| 4922     | <i>Pichia pastoris</i>                       | PICPA.1                 | Ghent university          | 10/06/2009 |
| 4924     | <i>Pichia stipitis</i>                       | PICST.2                 | integr8                   | 12/09/2010 |
| 4929     | <i>Pichia guilliermondii</i>                 | PICGU.1                 | Broad_Institute           | 01/04/2007 |
| 4932     | <i>Saccharomyces cerevisiae</i>              | YEAST.8                 | YGOB                      | 28/10/2013 |
| 4952     | <i>Yarrowia lipolytica</i>                   | YARLI.2                 | integr8                   | 12/09/2010 |
| 4959     | <i>Debaryomyces hansenii</i>                 | DEBHA.3                 | Broad_Institute           | 11/11/2010 |
| 5476     | <i>Candida albicans</i>                      | CANAL.3                 | Broad_Institute           | 11/11/2010 |
| 5478     | <i>Candida glabrata</i>                      | CANGA.4                 | Genolevures               | 02/04/2011 |
| 5480     | <i>Candida parapsilosis</i>                  | CANPA.1                 | Broad_Institute           | 18/12/2008 |
| 5482     | <i>Candida tropicalis</i>                    | CANTR.1                 | Broad_Institute           | 01/04/2007 |
| 36911    | <i>Clavispora lusitaniae</i>                 | CLALS.1                 | Broad_Institute           | 01/04/2007 |
| 36914    | <i>Lodderomyces elongisporus</i>             | LODEL.2                 | Broad_Institute           | 11/11/2010 |
| 42374    | <i>Candida dubliniensis</i>                  | CANDU.2                 | Sanger Institute          | 07/04/2010 |
| 45596    | <i>Candida tenuis</i>                        | CANTE.1                 | JGI                       | 03/04/2013 |
| 46583    | <i>Candida tanzawaensis</i>                  | 46583.1                 | JGI                       | 03/04/2013 |
| 51930    | <i>Candida caseinolytica</i>                 | 51930.1                 | JGI                       | 03/04/2013 |
| 130810   | <i>Candida arabinofermentans</i>             | 130810.1                | JGI                       | 03/04/2013 |
| 273131   | <i>Candida bracarensis</i>                   | 273131.1                | Nakaseomyces sequencing   | 14/04/2011 |
| 273372   | <i>Candida metapsilosis</i>                  | 273372.1                | This work                 | 21/07/2014 |
| 284811   | <i>Ashbya gossypii</i> ATCC 10895            | ASHGO.3                 | integr8                   | 12/09/2010 |
| 418086   | <i>Candida nivariensis</i>                   | 418086.1                | Comparative genomics, CRG | 14/04/2011 |
| 561895   | <i>Candida subhashii</i>                     | 561895.3                | in preparation            | 21/07/2014 |
| 619300   | <i>Spathaspora passalidarum</i> NRRL Y-27907 | 619300.1                | JGI                       | 05/09/2011 |
| 638633   | <i>Pichia angusta</i> NCYC 495 leu1.1        | 638633.1                | JGI                       | 05/09/2011 |
| 763406   | <i>Pichia membranifaciens</i> NRRL Y-2026    | 763406.1                | JGI                       | 05/09/2011 |
| 1136231  | <i>Candida orthopsilosis</i> Co 90-125       | CANO9.1                 | UniProt                   | 03/04/2013 |
| 1382548  | <i>Candida orthopsilosis</i> MCO456          | 9999993.3               | Comparative genomics, CRG | 21/07/2014 |
